# Supplementary material for: Ribosome collisions trigger cis-acting feedback inhibition of translation initiation
Source: eLife. 2020 Jul 13;9:e60038. doi: 10.7554/eLife.60038 (PMC7381030; doi:10.7554/eLife.60038)
Supplement: Figure 1—source data 1. [file elife-60038-fig1-data1.xlsx]

## Sheet: WT cells
The table shows tandem mass tag (TMT) mass spectrometry data obtained from polysome analysis in WT cells. The quantitative value for each protein in each sample is indicated in the first set of columns. The next set of columns contains the average quantitative value of the two replicates. The third set of columns contains pairwise ratios.
Low eme = treatment with 1.8 µM emetine for 15 min
High eme = treatment with 360 µM emetine for 15 min
Unt = untreated cells (using DMSO vehicle only) for 15 min
The data are sorted in descending order by the "Low/Unt" column
Accession	Description	Low Eme 1	Low Eme 2	High Eme 1	High Eme 2	Unt 1	Unt 2	Low Avg	High Avg	Unt Avg	Low/Unt	Low/High	High/Unt
Q86UK7	ZNF598	69.7	66.3	19.6	23.6	22	17.3	68	21.6	19.7	3.46	3.15	1.1
Q96ST3	Paired amphipathic helix protein Sin3a OS=Homo sapiens GN=SIN3A PE=1 SV=2	112.5	190.2	103.3	77.2	57.1	58.4	151.4	90.3	57.8	2.62	1.68	1.56
Q2TAY7	WD40 repeat-containing protein SMU1 OS=Homo sapiens GN=SMU1 PE=1 SV=2	208.6	562.9	190.2	163	121.3	178.1	385.8	176.6	149.7	2.58	2.18	1.18
Q9UL40-2	Isoform 2 of Zinc finger protein 346 OS=Homo sapiens GN=ZNF346	253	517.1	195.6	164	148	203.6	385.1	179.8	175.8	2.19	2.14	1.02
O60869	Endothelial differentiation-related factor 1 OS=Homo sapiens GN=EDF1 PE=1 SV=1	5930.7	5090.5	2424.3	1917.5	2772	2695.2	5510.6	2170.9	2733.6	2.02	2.54	0.79
Q15393	Splicing factor 3B subunit 3 OS=Homo sapiens GN=SF3B3 PE=1 SV=4	184.8	349.6	143.4	150	110.5	155.2	267.2	146.7	132.9	2.01	1.82	1.1
O60832	H/ACA ribonucleoprotein complex subunit 4 OS=Homo sapiens GN=DKC1 PE=1 SV=3	215.3	520.6	196	207.6	233.7	186.9	368	201.8	210.3	1.75	1.82	0.96
Q6Y7W6	PERQ amino acid-rich with GYF domain-containing protein 2 OS=Homo sapiens GN=GIGYF2 PE=1 SV=1	3033.2	2872.8	1591.8	1548.1	1753.4	1697.5	2953	1570	1725.5	1.71	1.88	0.91
F8W727	60S ribosomal protein L32 OS=Homo sapiens GN=RPL32 PE=1 SV=1	11814.8	25359.9	10912.2	11786.7	10291.7	11722	18587.4	11349.5	11006.9	1.69	1.64	1.03
O75179	Ankyrin repeat domain-containing protein 17 OS=Homo sapiens GN=ANKRD17 PE=1 SV=3	107.2	165.1	97.3	86.4	84.5	78.5	136.2	91.9	81.5	1.67	1.48	1.13
P06576	ATP synthase subunit beta, mitochondrial OS=Homo sapiens GN=ATP5B PE=1 SV=3	189.8	180	128.4	111.9	97.8	124.1	184.9	120.2	111	1.67	1.54	1.08
P49755	Transmembrane emp24 domain-containing protein 10 OS=Homo sapiens GN=TMED10 PE=1 SV=2	145.9	291.5	112.9	99.8	143.2	118.8	218.7	106.4	131	1.67	2.06	0.81
Q53RG0	Eukaryotic translation initiation factor 4E member 2, isoform CRA_c OS=Homo sapiens GN=tmp_locus_9 PE=2 SV=1	849.6	748.1	579.1	460.1	467	509.4	798.9	519.6	488.2	1.64	1.54	1.06
Q659C4	La-related protein 1B OS=Homo sapiens GN=LARP1B PE=1 SV=2	230.7	389	252.7	206	188.4	194	309.9	229.4	191.2	1.62	1.35	1.2
P79522	Proline-rich protein 3 OS=Homo sapiens GN=PRR3 PE=1 SV=2	145.4	182.5	134.4	104	97.6	104.3	164	119.2	101	1.62	1.38	1.18
P13639	Elongation factor 2 OS=Homo sapiens GN=EEF2 PE=1 SV=4	30443.7	27558.9	41287.3	43158.7	15940.3	20073.7	29001.3	42223	18007	1.61	0.69	2.34
P52434-4	Isoform 4 of DNA-directed RNA polymerases I, II, and III subunit RPABC3 OS=Homo sapiens GN=POLR2H	107.2	60.9	56.7	59.6	53.3	57.4	84.1	58.2	55.4	1.52	1.45	1.05
Q06265-2	Isoform 2 of Exosome complex component RRP45 OS=Homo sapiens GN=EXOSC9	459.7	753.9	501.4	372.6	353.9	448	606.8	437	401	1.51	1.39	1.09
V9GZ56	U6 snRNA-associated Sm-like protein LSm4 (Fragment) OS=Homo sapiens GN=LSM4 PE=1 SV=1	231.6	366.6	236.3	191.8	185.4	212.6	299.1	214.1	199	1.5	1.4	1.08
P38935	DNA-binding protein SMUBP-2 OS=Homo sapiens GN=IGHMBP2 PE=1 SV=3	222.4	307	186.5	166	188.7	173.8	264.7	176.3	181.3	1.46	1.5	0.97
Q9NRA8-3	Isoform 3 of Eukaryotic translation initiation factor 4E transporter OS=Homo sapiens GN=EIF4ENIF1	518.7	675.8	505.5	486.7	405.8	413.1	597.3	496.1	409.5	1.46	1.2	1.21
Q6P158	Putative ATP-dependent RNA helicase DHX57 OS=Homo sapiens GN=DHX57 PE=1 SV=2	1940.6	1958.3	1793.9	1727.8	1321.9	1395.4	1949.5	1760.9	1358.7	1.43	1.11	1.3
Q7Z460	CLIP-associating protein 1 OS=Homo sapiens GN=CLASP1 PE=1 SV=1	119.4	137.9	128.8	80.7	83.3	101.7	128.7	104.8	92.5	1.39	1.23	1.13
Q9BTD8	RNA-binding protein 42 OS=Homo sapiens GN=RBM42 PE=1 SV=1	571.4	1181.6	654.3	640.8	623.2	636.6	876.5	647.6	629.9	1.39	1.35	1.03
Q9BQG0-2	Isoform 2 of Myb-binding protein 1A OS=Homo sapiens GN=MYBBP1A	343.3	551.7	368.1	391.8	230.6	420.9	447.5	380	325.8	1.37	1.18	1.17
P30153	Serine/threonine-protein phosphatase 2A 65 kDa regulatory subunit A alpha isoform OS=Homo sapiens GN=PPP2R1A PE=1 SV=4	135.5	184.7	133.9	115.5	90.8	143.8	160.1	124.7	117.3	1.36	1.28	1.06
Q9UNQ2	Probable dimethyladenosine transferase OS=Homo sapiens GN=DIMT1 PE=1 SV=1	819.4	1146	909	763.1	687	773.1	982.7	836.1	730.1	1.35	1.18	1.15
Q9NZM5	Glioma tumor suppressor candidate region gene 2 protein OS=Homo sapiens GN=GLTSCR2 PE=1 SV=2	106	99.1	97.8	75	61.5	91.2	102.6	86.4	76.4	1.34	1.19	1.13
P55010	Eukaryotic translation initiation factor 5 OS=Homo sapiens GN=EIF5 PE=1 SV=2	903.7	924.8	849.4	620.6	627.4	736.9	914.3	735	682.2	1.34	1.24	1.08
O75531	Barrier-to-autointegration factor OS=Homo sapiens GN=BANF1 PE=1 SV=1	808.3	847.8	557.7	584.8	680.1	587.7	828.1	571.3	633.9	1.31	1.45	0.9
Q9UII4	E3 ISG15--protein ligase HERC5 OS=Homo sapiens GN=HERC5 PE=1 SV=2	547.2	685.3	505.5	461.1	440.2	499	616.3	483.3	469.6	1.31	1.28	1.03
F8VZG9	RNA-binding protein fox-1 homolog 1 OS=Homo sapiens GN=RBFOX1 PE=4 SV=1	157.2	194.6	180.7	151.1	125.2	142.4	175.9	165.9	133.8	1.31	1.06	1.24
F8WB05	Ataxin-2 (Fragment) OS=Homo sapiens GN=ATXN2 PE=1 SV=2	39.5	40.2	33.9	29.8	26.9	34.5	39.9	31.9	30.7	1.3	1.25	1.04
P81605-2	Isoform 2 of Dermcidin OS=Homo sapiens GN=DCD	944.6	1185.3	1228.4	876.9	885.5	767.4	1065	1052.7	826.5	1.29	1.01	1.27
Q13618	Cullin-3 OS=Homo sapiens GN=CUL3 PE=1 SV=2	187.8	250.6	177.3	186.9	177.7	164.4	219.2	182.1	171.1	1.28	1.2	1.06
Q13144	Translation initiation factor eIF-2B subunit epsilon OS=Homo sapiens GN=EIF2B5 PE=1 SV=3	1653.3	2331.8	1711.2	1511.7	1384.5	1727.8	1992.6	1611.5	1556.2	1.28	1.24	1.04
Q9H074	Polyadenylate-binding protein-interacting protein 1 OS=Homo sapiens GN=PAIP1 PE=1 SV=1	64.8	61.6	79.9	84.2	42	57.8	63.2	82.1	49.9	1.27	0.77	1.64
P62263	40S ribosomal protein S14 OS=Homo sapiens GN=RPS14 PE=1 SV=3	13019.6	9455	9675.6	8695.3	8202.9	9526.4	11237.3	9185.5	8864.7	1.27	1.22	1.04
J3KTA4	Probable ATP-dependent RNA helicase DDX5 OS=Homo sapiens GN=DDX5 PE=1 SV=1	1010.7	1617.7	912.6	799.8	1116.2	963.9	1314.2	856.2	1040.1	1.26	1.53	0.82
Q9H0A0	RNA cytidine acetyltransferase OS=Homo sapiens GN=NAT10 PE=1 SV=2	146.1	143.1	126.1	97.8	101.4	128.8	144.6	112	115.1	1.26	1.29	0.97
O43172	U4/U6 small nuclear ribonucleoprotein Prp4 OS=Homo sapiens GN=PRPF4 PE=1 SV=2	301.9	413.3	275.2	248.5	297.1	276	357.6	261.9	286.6	1.25	1.37	0.91
A0A024RA52	Proteasome subunit alpha type OS=Homo sapiens GN=PSMA2 PE=1 SV=1	65.2	57	44.5	35.7	46.1	52.4	61.1	40.1	49.3	1.24	1.52	0.81
Q8WU90	Zinc finger CCCH domain-containing protein 15 OS=Homo sapiens GN=ZC3H15 PE=1 SV=1	389.4	750.1	357	342.9	433.4	487.2	569.8	350	460.3	1.24	1.63	0.76
Q9GZS3	WD repeat-containing protein 61 OS=Homo sapiens GN=WDR61 PE=1 SV=1	111.3	111.9	101.4	92.6	84.7	97.2	111.6	97	91	1.23	1.15	1.07
Q9Y3Z3	Deoxynucleoside triphosphate triphosphohydrolase SAMHD1 OS=Homo sapiens GN=SAMHD1 PE=1 SV=2	69.8	90.5	90.3	88.8	68.3	64	80.2	89.6	66.2	1.21	0.9	1.35
Q13523	Serine/threonine-protein kinase PRP4 homolog OS=Homo sapiens GN=PRPF4B PE=1 SV=3	135.7	132.2	100.8	103.5	115.6	106.6	134	102.2	111.1	1.21	1.31	0.92
P19388	DNA-directed RNA polymerases I, II, and III subunit RPABC1 OS=Homo sapiens GN=POLR2E PE=1 SV=4		227.7		153		189.3	227.7	153	189.3	1.2	1.49	0.81
O00505	Importin subunit alpha-4 OS=Homo sapiens GN=KPNA3 PE=1 SV=2	66.9	71.9	42.5	44.8	51.1	65	69.4	43.7	58.1	1.2	1.59	0.75
P35250	Replication factor C subunit 2 OS=Homo sapiens GN=RFC2 PE=1 SV=3	883.2	896.2	749.3	673	682.2	806.5	889.7	711.2	744.4	1.2	1.25	0.96
Q96T21	Selenocysteine insertion sequence-binding protein 2 OS=Homo sapiens GN=SECISBP2 PE=1 SV=2	81.4	71	78.1	71.5	61.2	66.1	76.2	74.8	63.7	1.2	1.02	1.18
Q9UBI9	Headcase protein homolog OS=Homo sapiens GN=HECA PE=1 SV=1	71	80.9	65.1	54.5	61.5	65.7	76	59.8	63.6	1.19	1.27	0.94
P08579	U2 small nuclear ribonucleoprotein B'' OS=Homo sapiens GN=SNRPB2 PE=1 SV=1	314.4	128.1	238.2	173.2	208.2	162.7	221.3	205.7	185.5	1.19	1.08	1.11
E7EQR4	Ezrin OS=Homo sapiens GN=EZR PE=1 SV=3	204.9	237.7	297.8	165.3	184.1	189.6	221.3	231.6	186.9	1.18	0.96	1.24
Q15363	Transmembrane emp24 domain-containing protein 2 OS=Homo sapiens GN=TMED2 PE=1 SV=1	74.1	80.6	59.3	51.9	57	74.1	77.4	55.6	65.6	1.18	1.39	0.85
Q6PGP7	Tetratricopeptide repeat protein 37 OS=Homo sapiens GN=TTC37 PE=1 SV=1	293.7	242	278.7	262.9	236.2	219.6	267.9	270.8	227.9	1.18	0.99	1.19
Q9H7E2-3	Isoform 3 of Tudor domain-containing protein 3 OS=Homo sapiens GN=TDRD3	413.2	609.9	475.6	402.2	408.7	463.1	511.6	438.9	435.9	1.17	1.17	1.01
Q8TDN6	Ribosome biogenesis protein BRX1 homolog OS=Homo sapiens GN=BRIX1 PE=1 SV=2	146.1	227.5	150.4	157.4	166.5	152.6	186.8	153.9	159.6	1.17	1.21	0.96
P31942	Heterogeneous nuclear ribonucleoprotein H3 OS=Homo sapiens GN=HNRNPH3 PE=1 SV=2	75.3	95	72.5	65.8	67.6	78.5	85.2	69.2	73.1	1.17	1.23	0.95
A0A0D9SGE8	PHD finger protein 6 OS=Homo sapiens GN=PHF6 PE=1 SV=1	49.1	35.2	41.4	32.3	31.8	40.5	42.2	36.9	36.2	1.17	1.14	1.02
A0A024R4E5	High density lipoprotein binding protein (Vigilin), isoform CRA_a OS=Homo sapiens GN=HDLBP PE=1 SV=1	95.3	119.9	102.7	97.9	102.3	82.8	107.6	100.3	92.6	1.16	1.07	1.08
Q7L2E3-2	Isoform 2 of Putative ATP-dependent RNA helicase DHX30 OS=Homo sapiens GN=DHX30	3037.5	3466.7	2819.3	2475.7	2679.6	2949	3252.1	2647.5	2814.3	1.16	1.23	0.94
P83731	60S ribosomal protein L24 OS=Homo sapiens GN=RPL24 PE=1 SV=1	12200.6	17699.9	12312	13672.6	13642.1	12211.7	14950.3	12992.3	12926.9	1.16	1.15	1.01
Q9UKZ1	CCR4-NOT transcription complex subunit 11 OS=Homo sapiens GN=CNOT11 PE=1 SV=1	289.2	393.8	275.7	259.6	285.2	306.7	341.5	267.7	296	1.15	1.28	0.9
Q8N3C0	Activating signal cointegrator 1 complex subunit 3 OS=Homo sapiens GN=ASCC3 PE=1 SV=3	382.8	424.7	353	324.2	361.4	342.9	403.8	338.6	352.2	1.15	1.19	0.96
O14654	Insulin receptor substrate 4 OS=Homo sapiens GN=IRS4 PE=1 SV=1	247.3	222.5	215.1	168.8	167.2	240.6	234.9	192	203.9	1.15	1.22	0.94
P05386	60S acidic ribosomal protein P1 OS=Homo sapiens GN=RPLP1 PE=1 SV=1	7847.4	6690.8	6883.5	7615.4	5214.2	7441	7269.1	7249.5	6327.6	1.15	1	1.15
Q9Y3U8	60S ribosomal protein L36 OS=Homo sapiens GN=RPL36 PE=1 SV=3	3481.9	3859.8	3282	2800	3225.4	3163.9	3670.9	3041	3194.7	1.15	1.21	0.95
P26368	Splicing factor U2AF 65 kDa subunit OS=Homo sapiens GN=U2AF2 PE=1 SV=4	32.8	51.8	38.9	30.7	37.8	36.4	42.3	34.8	37.1	1.14	1.22	0.94
P41208	Centrin-2 OS=Homo sapiens GN=CETN2 PE=1 SV=1	169.2	149	117	117.5	122.9	157.2	159.1	117.3	140.1	1.14	1.36	0.84
P26641	Elongation factor 1-gamma OS=Homo sapiens GN=EEF1G PE=1 SV=3	2231.4	3289.5	2182.7	2175.2	2531.6	2332.3	2760.5	2179	2432	1.14	1.27	0.9
P60842	Eukaryotic initiation factor 4A-I OS=Homo sapiens GN=EIF4A1 PE=1 SV=1	1877.1	2679.9	2268	2114.2	1885.5	2143.1	2278.5	2191.1	2014.3	1.13	1.04	1.09
Q15773	Myeloid leukemia factor 2 OS=Homo sapiens GN=MLF2 PE=1 SV=1	174.6	163.5	150	114.3	151.9	147.3	169.1	132.2	149.6	1.13	1.28	0.88
Q9HAN9	Nicotinamide/nicotinic acid mononucleotide adenylyltransferase 1 OS=Homo sapiens GN=NMNAT1 PE=1 SV=1	501.8	619.8	484	458.8	484.4	509.8	560.8	471.4	497.1	1.13	1.19	0.95
Q9BYG3	MKI67 FHA domain-interacting nucleolar phosphoprotein OS=Homo sapiens GN=NIFK PE=1 SV=1	610.9	586.4	510.2	523.8	560.3	504.2	598.7	517	532.3	1.12	1.16	0.97
P46063	ATP-dependent DNA helicase Q1 OS=Homo sapiens GN=RECQL PE=1 SV=3	336.1	383.4	325	308.1	313.7	330.3	359.8	316.6	322	1.12	1.14	0.98
A0A087WYN9	ATP-dependent RNA helicase DHX29 OS=Homo sapiens GN=DHX29 PE=1 SV=1	576	628.7	562.9	437.8	560.7	514.7	602.4	500.4	537.7	1.12	1.2	0.93
Q9NZT1	Calmodulin-like protein 5 OS=Homo sapiens GN=CALML5 PE=1 SV=2	90.6	98.8	118.4	84.7	61.8	107.5	94.7	101.6	84.7	1.12	0.93	1.2
P62081	40S ribosomal protein S7 OS=Homo sapiens GN=RPS7 PE=1 SV=1	9111.2	9649.1	9259.6	8889.6	8316.3	8496.6	9380.2	9074.6	8406.5	1.12	1.03	1.08
Q7L2H7	Eukaryotic translation initiation factor 3 subunit M OS=Homo sapiens GN=EIF3M PE=1 SV=1	1968.5	2174.7	2068	1922.1	1647.9	2068	2071.6	1995.1	1858	1.11	1.04	1.07
Q8N163	Cell cycle and apoptosis regulator protein 2 OS=Homo sapiens GN=CCAR2 PE=1 SV=2	596.8	609.6	536.6	451.5	605.6	481.7	603.2	494.1	543.7	1.11	1.22	0.91
P09661	U2 small nuclear ribonucleoprotein A' OS=Homo sapiens GN=SNRPA1 PE=1 SV=2	594.5	742.9	593.5	520.6	590.1	614.4	668.7	557.1	602.3	1.11	1.2	0.92
P13010	X-ray repair cross-complementing protein 5 OS=Homo sapiens GN=XRCC5 PE=1 SV=3	3512.6	4304.7	3382.1	3312.4	3801.6	3250.9	3908.7	3347.3	3526.3	1.11	1.17	0.95
P62829	60S ribosomal protein L23 OS=Homo sapiens GN=RPL23 PE=1 SV=1	13407.4	14274.7	13867.3	13590.4	10748.6	14277.7	13841.1	13728.9	12513.2	1.11	1.01	1.1
P61353	60S ribosomal protein L27 OS=Homo sapiens GN=RPL27 PE=1 SV=2	7740.5	7811.4	6560.1	5949.2	7394.2	6594.3	7776	6254.7	6994.3	1.11	1.24	0.89
Q02878	60S ribosomal protein L6 OS=Homo sapiens GN=RPL6 PE=1 SV=3	15467.9	17081.3	14824.1	14045.9	14658	14653.9	16274.6	14435	14656	1.11	1.13	0.98
P08195-4	Isoform 4 of 4F2 cell-surface antigen heavy chain OS=Homo sapiens GN=SLC3A2	167	190.6	167.6	132.8	173.4	150.1	178.8	150.2	161.8	1.11	1.19	0.93
Q9Y4Y9	U6 snRNA-associated Sm-like protein LSm5 OS=Homo sapiens GN=LSM5 PE=1 SV=3	462.9	457.2	420.5	367.6	377.9	454.3	460.1	394.1	416.1	1.11	1.17	0.95
E7EQ64	Trypsin-1 OS=Homo sapiens GN=PRSS1 PE=1 SV=1	1566.9	1058.4	1173.4	945.9	876.9	1504.7	1312.7	1059.7	1190.8	1.1	1.24	0.89
P60866	40S ribosomal protein S20 OS=Homo sapiens GN=RPS20 PE=1 SV=1	3848.2	4100.5	3963.6	3745.9	3338.2	3872.8	3974.4	3854.8	3605.5	1.1	1.03	1.07
P62854	40S ribosomal protein S26 OS=Homo sapiens GN=RPS26 PE=1 SV=3	2747.7	3485.8	3071.3	2947.8	3065.2	2591.9	3116.8	3009.6	2828.6	1.1	1.04	1.06
P62891	60S ribosomal protein L39 OS=Homo sapiens GN=RPL39 PE=1 SV=2	272.3	273.7	218.8	240.3	247.2	249.4	273	229.6	248.3	1.1	1.19	0.92
B3KSH1	Eukaryotic translation initiation factor 3 subunit F OS=Homo sapiens GN=EIF3F PE=2 SV=1	2244.3	2371.2	2250.8	2165.1	2012.6	2211.2	2307.8	2208	2111.9	1.09	1.05	1.05
B0QY89	Eukaryotic translation initiation factor 3 subunit L OS=Homo sapiens GN=EIF3L PE=1 SV=1	5940.7	6929.1	6244.8	5870.4	5787.8	5972.7	6434.9	6057.6	5880.3	1.09	1.06	1.03
Q9NUQ6-3	Isoform 3 of SPATS2-like protein OS=Homo sapiens GN=SPATS2L	319.1	323.7	266.7	276.3	315.8	272.9	321.4	271.5	294.4	1.09	1.18	0.92
P11586	C-1-tetrahydrofolate synthase, cytoplasmic OS=Homo sapiens GN=MTHFD1 PE=1 SV=3	6027.8	4984.7	5353.8	3800.3	4974.3	5168.6	5506.3	4577.1	5071.5	1.09	1.2	0.9
Q5SW79	Centrosomal protein of 170 kDa OS=Homo sapiens GN=CEP170 PE=1 SV=1	302.7	346.6	267.8	237.5	302	295	324.7	252.7	298.5	1.09	1.28	0.85
P78527	DNA-dependent protein kinase catalytic subunit OS=Homo sapiens GN=PRKDC PE=1 SV=3	11795.8	13662.4	12348.3	11104.6	11657.2	11773.5	12729.1	11726.5	11715.4	1.09	1.09	1
Q00839	Heterogeneous nuclear ribonucleoprotein U OS=Homo sapiens GN=HNRNPU PE=1 SV=6	11517.1	12481.6	12530.5	12328.6	11533.3	10545	11999.4	12429.6	11039.2	1.09	0.97	1.13
Q9UQ80	Proliferation-associated protein 2G4 OS=Homo sapiens GN=PA2G4 PE=1 SV=3	14643.4	14444	18177.7	18038.4	13070.1	13656	14543.7	18108.1	13363.1	1.09	0.8	1.36
P62244	40S ribosomal protein S15a OS=Homo sapiens GN=RPS15A PE=1 SV=2	6606.3	7156.1	6640.7	6107.6	6427.6	6211.4	6881.2	6374.2	6319.5	1.09	1.08	1.01
P51149	Ras-related protein Rab-7a OS=Homo sapiens GN=RAB7A PE=1 SV=1	139.8	174.1	147.1	103.3	180.1	109.7	157	125.2	144.9	1.08	1.25	0.86
P25786-2	Isoform Long of Proteasome subunit alpha type-1 OS=Homo sapiens GN=PSMA1	445.4	671.4	324.9	274.2	678.9	353.5	558.4	299.6	516.2	1.08	1.86	0.58
Q96HR8	H/ACA ribonucleoprotein complex non-core subunit NAF1 OS=Homo sapiens GN=NAF1 PE=1 SV=2	106	119.6	119.3	119.4	87.1	122.7	112.8	119.4	104.9	1.08	0.95	1.14
P62851	40S ribosomal protein S25 OS=Homo sapiens GN=RPS25 PE=1 SV=1	5108.8	6065.8	5116.2	5399	5283.4	5107.4	5587.3	5257.6	5195.4	1.08	1.06	1.01
Q7L2J0	7SK snRNA methylphosphate capping enzyme OS=Homo sapiens GN=MEPCE PE=1 SV=1	269.4	263.8	226.2	229.7	266.4	231	266.6	228	248.7	1.07	1.17	0.92
Q9GZR7	ATP-dependent RNA helicase DDX24 OS=Homo sapiens GN=DDX24 PE=1 SV=1	1628.8	1918.2	1501.4	1326.8	1666	1649.7	1773.5	1414.1	1657.9	1.07	1.25	0.85
P05198	Eukaryotic translation initiation factor 2 subunit 1 OS=Homo sapiens GN=EIF2S1 PE=1 SV=3	1689.1	2005.2	2050.7	1992.5	1717.1	1729.2	1847.2	2021.6	1723.2	1.07	0.91	1.17
Q9Y5Q9	General transcription factor 3C polypeptide 3 OS=Homo sapiens GN=GTF3C3 PE=1 SV=1	123.4	121.7	113.2	92.1	116.3	112.1	122.6	102.7	114.2	1.07	1.19	0.9
Q12905	Interleukin enhancer-binding factor 2 OS=Homo sapiens GN=ILF2 PE=1 SV=2	5608.8	5772.9	5510.8	5131.2	5717.3	4928.1	5690.9	5321	5322.7	1.07	1.07	1
P15880	40S ribosomal protein S2 OS=Homo sapiens GN=RPS2 PE=1 SV=2	28189.5	28781	28466.3	27520.4	26271.5	27011.7	28485.3	27993.4	26641.6	1.07	1.02	1.05
P46782	40S ribosomal protein S5 OS=Homo sapiens GN=RPS5 PE=1 SV=4	11840	13179.2	13744.9	14556.2	10665.9	12749.1	12509.6	14150.6	11707.5	1.07	0.88	1.21
Q13868	Exosome complex component RRP4 OS=Homo sapiens GN=EXOSC2 PE=1 SV=2	125.5	122.6	118.3	109.9	101.1	131.3	124.1	114.1	116.2	1.07	1.09	0.98
Q12986	Transcriptional repressor NF-X1 OS=Homo sapiens GN=NFX1 PE=1 SV=2	268.6	236.9	229.3	186.7	223	250.3	252.8	208	236.7	1.07	1.22	0.88
A0A0A0MRR7	U1 small nuclear ribonucleoprotein C OS=Homo sapiens GN=SNRPC PE=1 SV=1	356.5	443.7	412.8	293.8	365.7	383.9	400.1	353.3	374.8	1.07	1.13	0.94
Q13347	Eukaryotic translation initiation factor 3 subunit I OS=Homo sapiens GN=EIF3I PE=1 SV=1	2956.2	3707.3	2876.2	2662.3	3297	2973.8	3331.8	2769.3	3135.4	1.06	1.2	0.88
O43390	Heterogeneous nuclear ribonucleoprotein R OS=Homo sapiens GN=HNRNPR PE=1 SV=1	5055.7	5560.1	4881.5	4874.8	5031.3	4942.4	5307.9	4878.2	4986.9	1.06	1.09	0.98
P35268	60S ribosomal protein L22 OS=Homo sapiens GN=RPL22 PE=1 SV=2	5031	5652.4	5243.7	5296.8	4650.8	5410.7	5341.7	5270.3	5030.8	1.06	1.01	1.05
Q08211	ATP-dependent RNA helicase A OS=Homo sapiens GN=DHX9 PE=1 SV=4	7799.5	8759.6	7525.2	6563	8008.9	7672.2	8279.6	7044.1	7840.6	1.06	1.18	0.9
P18621-3	Isoform 3 of 60S ribosomal protein L17 OS=Homo sapiens GN=RPL17	21528.1	23144.7	23118.1	23071	19316.9	22902.8	22336.4	23094.6	21109.9	1.06	0.97	1.09
P05387	60S acidic ribosomal protein P2 OS=Homo sapiens GN=RPLP2 PE=1 SV=1	13786.8	14069.7	12650.3	12506.9	13250.1	13122	13928.3	12578.6	13186.1	1.06	1.11	0.95
P62750	60S ribosomal protein L23a OS=Homo sapiens GN=RPL23A PE=1 SV=1	20655.2	20663.5	20142.1	19804.9	19064.9	19902.3	20659.4	19973.5	19483.6	1.06	1.03	1.03
P42285	Superkiller viralicidic activity 2-like 2 OS=Homo sapiens GN=SKIV2L2 PE=1 SV=3	1342	1661.3	1320	1175.3	1494	1356.8	1501.7	1247.7	1425.4	1.05	1.2	0.88
P62269	40S ribosomal protein S18 OS=Homo sapiens GN=RPS18 PE=1 SV=3	9419.9	8865.8	9088.5	8814.5	8719.4	8620.3	9142.9	8951.5	8669.9	1.05	1.02	1.03
O43823	A-kinase anchor protein 8 OS=Homo sapiens GN=AKAP8 PE=1 SV=1	264.8	231.8	213.4	199.1	249.7	224.4	248.3	206.3	237.1	1.05	1.2	0.87
A5YKK6	CCR4-NOT transcription complex subunit 1 OS=Homo sapiens GN=CNOT1 PE=1 SV=2	4541.6	5587.4	4021.1	3652.8	4710.9	4939.8	5064.5	3837	4825.4	1.05	1.32	0.8
Q9UIV1	CCR4-NOT transcription complex subunit 7 OS=Homo sapiens GN=CNOT7 PE=1 SV=3	372.3	557.9	379.4	347.7	426	457.8	465.1	363.6	441.9	1.05	1.28	0.82
P42166	Lamina-associated polypeptide 2, isoform alpha OS=Homo sapiens GN=TMPO PE=1 SV=2	136.8	159.2	150.4	107.5	123.3	158.1	148	129	140.7	1.05	1.15	0.92
Q9UN86	Ras GTPase-activating protein-binding protein 2 OS=Homo sapiens GN=G3BP2 PE=1 SV=2	1562.4	1576.3	1455.9	1374.7	1533	1462.3	1569.4	1415.3	1497.7	1.05	1.11	0.95
P62277	40S ribosomal protein S13 OS=Homo sapiens GN=RPS13 PE=1 SV=2	9704.2	9369.8	9677.5	9420.5	8978.8	9169.1	9537	9549	9074	1.05	1	1.05
P05388	60S acidic ribosomal protein P0 OS=Homo sapiens GN=RPLP0 PE=1 SV=1	19355.7	18330.9	19869.1	20413.9	17436.8	18544.9	18843.3	20141.5	17990.9	1.05	0.94	1.12
P38919	Eukaryotic initiation factor 4A-III OS=Homo sapiens GN=EIF4A3 PE=1 SV=4	4623.4	4999.9	4772.1	3957.2	4622.9	4607.4	4811.7	4364.7	4615.2	1.04	1.1	0.95
Q1KMD3	Heterogeneous nuclear ribonucleoprotein U-like protein 2 OS=Homo sapiens GN=HNRNPUL2 PE=1 SV=1	2468.3	2674.7	2520.6	2174.3	2433.9	2503	2571.5	2347.5	2468.5	1.04	1.1	0.95
Q53GS9	U4/U6.U5 tri-snRNP-associated protein 2 OS=Homo sapiens GN=USP39 PE=1 SV=2	404.1	462.9	350.4	316.1	397	436	433.5	333.3	416.5	1.04	1.3	0.8
Q9UHI6	Probable ATP-dependent RNA helicase DDX20 OS=Homo sapiens GN=DDX20 PE=1 SV=2	1583	1909.3	1578	1393.4	1610.3	1758.4	1746.2	1485.7	1684.4	1.04	1.18	0.88
P50914	60S ribosomal protein L14 OS=Homo sapiens GN=RPL14 PE=1 SV=4	7139.6	7575.8	8242.3	8368.6	6393.6	7821.7	7357.7	8305.5	7107.7	1.04	0.89	1.17
P62736	Actin, aortic smooth muscle OS=Homo sapiens GN=ACTA2 PE=1 SV=1	522.8	430.4	465.6	343.7	475	446.1	476.6	404.7	460.6	1.03	1.18	0.88
O43760-2	Isoform 2 of Synaptogyrin-2 OS=Homo sapiens GN=SYNGR2	269.1	245	230.8	203.5	283.3	213.5	257.1	217.2	248.4	1.03	1.18	0.87
Q9UN81	LINE-1 retrotransposable element ORF1 protein OS=Homo sapiens GN=L1RE1 PE=1 SV=1	180	145.7	166.9	135.5	155.9	159.6	162.9	151.2	157.8	1.03	1.08	0.96
P35998	26S protease regulatory subunit 7 OS=Homo sapiens GN=PSMC2 PE=1 SV=3	188.7	202.7	164.3	130.8	219.7	159.9	195.7	147.6	189.8	1.03	1.33	0.78
P63261	Actin, cytoplasmic 2 OS=Homo sapiens GN=ACTG1 PE=1 SV=1	540.4	490.5	492	415.1	545.4	458.1	515.5	453.6	501.8	1.03	1.14	0.9
P53396	ATP-citrate synthase OS=Homo sapiens GN=ACLY PE=1 SV=3	280.4	282.1	330.8	324.9	276	270.3	281.3	327.9	273.2	1.03	0.86	1.2
A0A0D9SF53	ATP-dependent RNA helicase DDX3X OS=Homo sapiens GN=DDX3X PE=1 SV=1	109.3	97.2	100.2	86.7	85.1	116	103.3	93.5	100.6	1.03	1.1	0.93
Q14152	Eukaryotic translation initiation factor 3 subunit A OS=Homo sapiens GN=EIF3A PE=1 SV=1	11399.3	13202.2	11916.2	11484.7	12534.9	11434.6	12300.8	11700.5	11984.8	1.03	1.05	0.98
A0A087WUT6	Eukaryotic translation initiation factor 5B OS=Homo sapiens GN=EIF5B PE=1 SV=1	1681.6	1551.4	1449.7	1242.2	1672	1474.5	1616.5	1346	1573.3	1.03	1.2	0.86
H0YAR2	Polyadenylate-binding protein 1 (Fragment) OS=Homo sapiens GN=PABPC1 PE=1 SV=1	61.3	55.5	58.3	48.8	55.1	58.5	58.4	53.6	56.8	1.03	1.09	0.94
Q9UJA5	tRNA (adenine(58)-N(1))-methyltransferase non-catalytic subunit TRM6 OS=Homo sapiens GN=TRMT6 PE=1 SV=1	878.6	890	842.2	827.3	903.2	813	884.3	834.8	858.1	1.03	1.06	0.97
P68363	Tubulin alpha-1B chain OS=Homo sapiens GN=TUBA1B PE=1 SV=1	1043	1022.7	960	796.2	1081.8	927.3	1032.9	878.1	1004.6	1.03	1.18	0.87
P42677	40S ribosomal protein S27 OS=Homo sapiens GN=RPS27 PE=1 SV=3	2888.7	2948.4	2824.7	2781.3	2866.2	2824.7	2918.6	2803	2845.5	1.03	1.04	0.99
P61247	40S ribosomal protein S3a OS=Homo sapiens GN=RPS3A PE=1 SV=2	19862	19224.3	18226.6	17869.3	19571	18553.6	19543.2	18048	19062.3	1.03	1.08	0.95
A0A0C4DG17	40S ribosomal protein SA OS=Homo sapiens GN=RPSA PE=1 SV=1	18424.7	16877.5	17090.5	16593.3	16798.3	17597.9	17651.1	16841.9	17198.1	1.03	1.05	0.98
P18124	60S ribosomal protein L7 OS=Homo sapiens GN=RPL7 PE=1 SV=1	22687.7	20918.4	21346.9	21091.5	20680	21795.9	21803.1	21219.2	21238	1.03	1.03	1
P52272	Heterogeneous nuclear ribonucleoprotein M OS=Homo sapiens GN=HNRNPM PE=1 SV=3	9991.9	9756.4	10628.1	9969.8	10293.7	8975.8	9874.2	10299	9634.8	1.02	0.96	1.07
P63104	14-3-3 protein zeta/delta OS=Homo sapiens GN=YWHAZ PE=1 SV=1	2104	1998.5	2571.1	2250.3	1978.1	2046.6	2051.3	2410.7	2012.4	1.02	0.85	1.2
Q01780	Exosome component 10 OS=Homo sapiens GN=EXOSC10 PE=1 SV=2	298.9	312.7	240.5	209	319.1	278.6	305.8	224.8	298.9	1.02	1.36	0.75
P62847-4	Isoform 4 of 40S ribosomal protein S24 OS=Homo sapiens GN=RPS24	5803.1	5607.9	5775	5591.2	5685.5	5463.8	5705.5	5683.1	5574.7	1.02	1	1.02
Q9BZE4	Nucleolar GTP-binding protein 1 OS=Homo sapiens GN=GTPBP4 PE=1 SV=3	2784.7	2964.2	2930.9	2633.3	2914.1	2700.4	2874.5	2782.1	2807.3	1.02	1.03	0.99
Q9Y2X3	Nucleolar protein 58 OS=Homo sapiens GN=NOP58 PE=1 SV=1	121.7	150.5	139	104.9	126.8	140.3	136.1	122	133.6	1.02	1.12	0.91
P26196	Probable ATP-dependent RNA helicase DDX6 OS=Homo sapiens GN=DDX6 PE=1 SV=2	2978.8	3479.7	3299.4	3066.9	3289.1	3034.5	3229.3	3183.2	3161.8	1.02	1.01	1.01
O75940	Survival of motor neuron-related-splicing factor 30 OS=Homo sapiens GN=SMNDC1 PE=1 SV=1	148.1	131.6	143.3	113.6	112.5	160.6	139.9	128.5	136.6	1.02	1.09	0.94
P25398	40S ribosomal protein S12 OS=Homo sapiens GN=RPS12 PE=1 SV=3	13465.8	12986.9	14073.5	14961.8	11980.2	13925.1	13226.4	14517.7	12952.7	1.02	0.91	1.12
P62906	60S ribosomal protein L10a OS=Homo sapiens GN=RPL10A PE=1 SV=2	10668.3	11777.4	12739.6	13153.1	9222	12833	11222.9	12946.4	11027.5	1.02	0.87	1.17
P46778	60S ribosomal protein L21 OS=Homo sapiens GN=RPL21 PE=1 SV=2	9877.8	9645	9086.1	9010	9767.9	9419.3	9761.4	9048.1	9593.6	1.02	1.08	0.94
P47813	Eukaryotic translation initiation factor 1A, X-chromosomal OS=Homo sapiens GN=EIF1AX PE=1 SV=2	589.6	629	633.5	544.2	608.6	591.9	609.3	588.9	600.3	1.02	1.03	0.98
A0A087X2G6	Nucleolar protein 16 OS=Homo sapiens GN=NOP16 PE=1 SV=1	387.9	299	344.9	277.4	308.8	367.4	343.5	311.2	338.1	1.02	1.1	0.92
P27635	60S ribosomal protein L10 OS=Homo sapiens GN=RPL10 PE=1 SV=4	11217.8	10459	10288.9	10201.5	10904	10423.5	10838.4	10245.2	10663.8	1.02	1.06	0.96
D3DQV9	Eukaryotic translation initiation factor 4 gamma 2 (Fragment) OS=Homo sapiens GN=EIF4G2 PE=1 SV=1	2025.3	2449.3	2660.6	2426.6	2060.5	2365.8	2237.3	2543.6	2213.2	1.01	0.88	1.15
Q12906-7	Isoform 7 of Interleukin enhancer-binding factor 3 OS=Homo sapiens GN=ILF3	11046.9	11755.2	10817.2	10576.3	12366.2	10179.5	11401.1	10696.8	11272.9	1.01	1.07	0.95
P20290	Transcription factor BTF3 OS=Homo sapiens GN=BTF3 PE=1 SV=1	157.8	172.7	139.2	138.8	151.4	174.6	165.3	139	163	1.01	1.19	0.85
A0A087WV05	Uncharacterized protein OS=Homo sapiens PE=4 SV=1	672.8	715.5	648.3	681.5	712.7	658.7	694.2	664.9	685.7	1.01	1.04	0.97
P12956	X-ray repair cross-complementing protein 6 OS=Homo sapiens GN=XRCC6 PE=1 SV=2	3451.2	3990.8	3920.9	3652.1	3991.8	3361.9	3721	3786.5	3676.9	1.01	0.98	1.03
P36578	60S ribosomal protein L4 OS=Homo sapiens GN=RPL4 PE=1 SV=5	31631.5	32004.4	32104.1	32908.5	29802.9	32904.5	31818	32506.3	31353.7	1.01	0.98	1.04
O00148	ATP-dependent RNA helicase DDX39A OS=Homo sapiens GN=DDX39A PE=1 SV=2	362.8	410.4	337	275.2	428.1	337.5	386.6	306.1	382.8	1.01	1.26	0.8
A0A0A0MRX1	ELAV-like protein OS=Homo sapiens GN=ELAVL2 PE=1 SV=1	525.5	653.6	539.6	470.3	585.4	582.2	589.6	505	583.8	1.01	1.17	0.86
Q99613	Eukaryotic translation initiation factor 3 subunit C OS=Homo sapiens GN=EIF3C PE=1 SV=1	5658.4	6790.9	5955.6	5921.3	6513.1	5862.9	6224.7	5938.5	6188	1.01	1.05	0.96
F8W930	Insulin-like growth factor 2 mRNA-binding protein 2 OS=Homo sapiens GN=IGF2BP2 PE=1 SV=1	1278.3	1446.2	1284.6	1173.8	1438.4	1264.5	1362.3	1229.2	1351.5	1.01	1.11	0.91
Q13823	Nucleolar GTP-binding protein 2 OS=Homo sapiens GN=GNL2 PE=1 SV=1	655	741.6	637.9	506	638.6	748.6	698.3	572	693.6	1.01	1.22	0.82
P62249	40S ribosomal protein S16 OS=Homo sapiens GN=RPS16 PE=1 SV=2	10647.6	11062	10863.6	10355.9	11740.1	9776.3	10854.8	10609.8	10758.2	1.01	1.02	0.99
P32969	60S ribosomal protein L9 OS=Homo sapiens GN=RPL9 PE=1 SV=1	10054.5	9968.7	10454.9	10452.8	9280.9	10572.7	10011.6	10453.9	9926.8	1.01	0.96	1.05
O00567	Nucleolar protein 56 OS=Homo sapiens GN=NOP56 PE=1 SV=4	105.7	105.3	110.4	79.8	105	105.2	105.5	95.1	105.1	1	1.11	0.9
O75643	U5 small nuclear ribonucleoprotein 200 kDa helicase OS=Homo sapiens GN=SNRNP200 PE=1 SV=2	4420.3	4732.3	4080.2	3402.8	4565.2	4553.2	4576.3	3741.5	4559.2	1	1.22	0.82
P31946	14-3-3 protein beta/alpha OS=Homo sapiens GN=YWHAB PE=1 SV=3	1024.9	1017.1	1235.1	1130.4	953.6	1081.5	1021	1182.8	1017.6	1	0.86	1.16
Q92600	Cell differentiation protein RCD1 homolog OS=Homo sapiens GN=RQCD1 PE=1 SV=1	818.4	919.9	736	711.6	791.3	945.7	869.2	723.8	868.5	1	1.2	0.83
A0A0U1RQC9	Cellular tumor antigen p53 OS=Homo sapiens GN=TP53 PE=1 SV=1	84.3	94.8	84.7	59.5	83.9	95.6	89.6	72.1	89.8	1	1.24	0.8
Q14677-3	Isoform 3 of Clathrin interactor 1 OS=Homo sapiens GN=CLINT1	2505.7	3356.4	2582.7	2508.8	3147.7	2708.2	2931.1	2545.8	2928	1	1.15	0.87
Q04637-8	Isoform 8 of Eukaryotic translation initiation factor 4 gamma 1 OS=Homo sapiens GN=EIF4G1	7933.4	9550.8	10727.4	10647.8	8554.9	8965.2	8742.1	10687.6	8760.1	1	0.82	1.22
A0A087WXF8	Nucleolar protein of 40 kDa OS=Homo sapiens GN=ZCCHC17 PE=1 SV=1	114.5	104.5	95.2	86	112.9	106.4	109.5	90.6	109.7	1	1.21	0.83
Q8IZL8	Proline-, glutamic acid- and leucine-rich protein 1 OS=Homo sapiens GN=PELP1 PE=1 SV=2	1015.2	1266.6	1041.9	838.3	1095.9	1188.6	1140.9	940.1	1142.3	1	1.21	0.82
Q9UKV8	Protein argonaute-2 OS=Homo sapiens GN=AGO2 PE=1 SV=3	645.4	649.7	630.3	525.6	697.2	598.1	647.6	578	647.7	1	1.12	0.89
Q96A72	Protein mago nashi homolog 2 OS=Homo sapiens GN=MAGOHB PE=1 SV=1	1909.8	2248.9	2230.2	1916.8	1978.7	2192	2079.4	2073.5	2085.4	1	1	0.99
Q7Z2T5	TRMT1-like protein OS=Homo sapiens GN=TRMT1L PE=1 SV=2	1528.3	1671.4	1484.3	1534.4	1808.6	1395.1	1599.9	1509.4	1601.9	1	1.06	0.94
P46776	60S ribosomal protein L27a OS=Homo sapiens GN=RPL27A PE=1 SV=2	4614.5	4500.4	4318.7	4199.8	4772	4340.4	4557.5	4259.3	4556.2	1	1.07	0.93
Q9H0U9	Testis-specific Y-encoded-like protein 1 OS=Homo sapiens GN=TSPYL1 PE=1 SV=3	148.1	157.5	147.8	123.4	176.6	130.1	152.8	135.6	153.4	1	1.13	0.88
P60228	Eukaryotic translation initiation factor 3 subunit E OS=Homo sapiens GN=EIF3E PE=1 SV=1	3045.5	3152.5	3063.8	2961.6	3211.5	3038.7	3099	3012.7	3125.1	0.99	1.03	0.96
O15234	Protein CASC3 OS=Homo sapiens GN=CASC3 PE=1 SV=2	197.6	205.7	232.2	215.8	196.9	209.7	201.7	224	203.3	0.99	0.9	1.1
P63244	Receptor of activated protein C kinase 1 OS=Homo sapiens GN=RACK1 PE=1 SV=3	26080.9	25408.6	25428	24771.1	26466.7	25415.3	25744.8	25099.6	25941	0.99	1.03	0.97
M0R2Z9	SURP and G-patch domain-containing protein 2 OS=Homo sapiens GN=SUGP2 PE=1 SV=1	408.8	375	352.9	289.2	378.4	410	391.9	321.1	394.2	0.99	1.22	0.81
P61981	14-3-3 protein gamma OS=Homo sapiens GN=YWHAG PE=1 SV=2	544.1	583.5	718.1	630.2	582.8	559.2	563.8	674.2	571	0.99	0.84	1.18
O95793	Double-stranded RNA-binding protein Staufen homolog 1 OS=Homo sapiens GN=STAU1 PE=1 SV=2	9706.2	9464.9	9017.8	9089.3	9893.4	9513.2	9585.6	9053.6	9703.3	0.99	1.06	0.93
Q9UQ80-2	Isoform 2 of Proliferation-associated protein 2G4 OS=Homo sapiens GN=PA2G4	577	369.4	683.5	507.4	428.4	530.2	473.2	595.5	479.3	0.99	0.79	1.24
P14678-3	Isoform SM-B1 of Small nuclear ribonucleoprotein-associated proteins B and B' OS=Homo sapiens GN=SNRPB	281.2	384.7	250	202.1	389.7	283.4	333	226.1	336.6	0.99	1.47	0.67
Q92615	La-related protein 4B OS=Homo sapiens GN=LARP4B PE=1 SV=3	6111.8	6654.1	5945.7	5909.2	6895	6037.7	6383	5927.5	6466.4	0.99	1.08	0.92
Q9HCS7	Pre-mRNA-splicing factor SYF1 OS=Homo sapiens GN=XAB2 PE=1 SV=2	206.8	176.6	190.8	185.4	204.1	184.1	191.7	188.1	194.1	0.99	1.02	0.97
P46781	40S ribosomal protein S9 OS=Homo sapiens GN=RPS9 PE=1 SV=3	12744.5	13758.3	14582.8	13719	14162.9	12657.2	13251.4	14150.9	13410.1	0.99	0.94	1.06
Q9BVP2	Guanine nucleotide-binding protein-like 3 OS=Homo sapiens GN=GNL3 PE=1 SV=2	5299.8	5830.8	5391.2	4897.5	5982.5	5335.6	5565.3	5144.4	5659.1	0.98	1.08	0.91
Q99471	Prefoldin subunit 5 OS=Homo sapiens GN=PFDN5 PE=1 SV=2	102.2	97	81.2	86.4	89.7	112.8	99.6	83.8	101.3	0.98	1.19	0.83
P62917	60S ribosomal protein L8 OS=Homo sapiens GN=RPL8 PE=1 SV=2	10638.4	9877.7	10404.6	9965.3	10246.4	10616.6	10258.1	10185	10431.5	0.98	1.01	0.98
A0A087WVQ6	Clathrin heavy chain OS=Homo sapiens GN=CLTC PE=1 SV=1	10445.7	11006.2	9756.3	9118.1	11253.6	10585.3	10726	9437.2	10919.5	0.98	1.14	0.86
E9PAV3	Nascent polypeptide-associated complex subunit alpha, muscle-specific form OS=Homo sapiens GN=NACA PE=1 SV=1	895.2	787	759.5	688.3	746.9	971.3	841.1	723.9	859.1	0.98	1.16	0.84
A0A0C4DG89	Probable ATP-dependent RNA helicase DDX46 OS=Homo sapiens GN=DDX46 PE=1 SV=1	319.9	269.5	282.2	219.1	311.7	288.8	294.7	250.7	300.3	0.98	1.18	0.83
D6RF23	Receptor of-activated protein C kinase 1 OS=Homo sapiens GN=RACK1 PE=1 SV=1	469.4	414.8	501.3	345.7	388.6	512.4	442.1	423.5	450.5	0.98	1.04	0.94
Q96PK6	RNA-binding protein 14 OS=Homo sapiens GN=RBM14 PE=1 SV=2	436.5	367.1	393.4	306.5	455	365.4	401.8	350	410.2	0.98	1.15	0.85
P49458	Signal recognition particle 9 kDa protein OS=Homo sapiens GN=SRP9 PE=1 SV=2	897.1	1068.5	849.7	808.4	1109.6	899.9	982.8	829.1	1004.8	0.98	1.19	0.83
Q5R363	SRSF protein kinase 1 OS=Homo sapiens GN=SRPK1 PE=1 SV=2	3168.8	3574.3	3181.1	3130.8	3205.8	3684.7	3371.6	3156	3445.3	0.98	1.07	0.92
Q7KZF4	Staphylococcal nuclease domain-containing protein 1 OS=Homo sapiens GN=SND1 PE=1 SV=1	483.4	424.9	460.4	409.8	498	428.2	454.2	435.1	463.1	0.98	1.04	0.94
Q08J23	tRNA (cytosine(34)-C(5))-methyltransferase OS=Homo sapiens GN=NSUN2 PE=1 SV=2	4705.3	5689.4	5392.6	5174.6	5424.9	5151.7	5197.4	5283.6	5288.3	0.98	0.98	1
P39019	40S ribosomal protein S19 OS=Homo sapiens GN=RPS19 PE=1 SV=2	18881.9	19481.6	19012.1	21021.4	20178.3	18866.1	19181.8	20016.8	19522.2	0.98	0.96	1.03
P63220	40S ribosomal protein S21 OS=Homo sapiens GN=RPS21 PE=1 SV=1	1745.5	1438.6	1534.6	1468.4	1737.9	1511.4	1592.1	1501.5	1624.7	0.98	1.06	0.92
P26373	60S ribosomal protein L13 OS=Homo sapiens GN=RPL13 PE=1 SV=4	7258.7	6756.9	6569.2	6830.7	7359	6944.8	7007.8	6700	7151.9	0.98	1.05	0.94
J3QQ67	60S ribosomal protein L18 (Fragment) OS=Homo sapiens GN=RPL18 PE=1 SV=1	9047.8	8581.8	9741	9243	8508.1	9502.6	8814.8	9492	9005.4	0.98	0.93	1.05
Q02543	60S ribosomal protein L18a OS=Homo sapiens GN=RPL18A PE=1 SV=2	7011.1	7067.1	7407.9	7244.3	6678.1	7669.7	7039.1	7326.1	7173.9	0.98	0.96	1.02
Q9H4L4	Sentrin-specific protease 3 OS=Homo sapiens GN=SENP3 PE=1 SV=2	135.4	194.1	140.5	120.2	165.3	172.3	164.8	130.4	168.8	0.98	1.26	0.77
A0A0B4J220	Chromosome 11 open reading frame 48, isoform CRA_c OS=Homo sapiens GN=C11orf98 PE=1 SV=1	963.2	710.7	848.6	649.7	915	804.5	837	749.2	859.8	0.97	1.12	0.87
Q92522	Histone H1x OS=Homo sapiens GN=H1FX PE=1 SV=1	652.4	661.7	721.2	542.6	682.4	666.4	657.1	631.9	674.4	0.97	1.04	0.94
Q9NW64	Pre-mRNA-splicing factor RBM22 OS=Homo sapiens GN=RBM22 PE=1 SV=1	293.7	270.4	246.4	202.2	282.5	298.5	282.1	224.3	290.5	0.97	1.26	0.77
Q99832	T-complex protein 1 subunit eta OS=Homo sapiens GN=CCT7 PE=1 SV=2	733.5	683.7	639.4	582.4	792.4	665.7	708.6	610.9	729.1	0.97	1.16	0.84
P46783	40S ribosomal protein S10 OS=Homo sapiens GN=RPS10 PE=1 SV=1	10865.3	9770.1	9959	9116.7	11233.5	9946.1	10317.7	9537.9	10589.8	0.97	1.08	0.9
P08708	40S ribosomal protein S17 OS=Homo sapiens GN=RPS17 PE=1 SV=2	12475	10974.9	11813	12232.1	12103.1	11981.8	11725	12022.6	12042.5	0.97	0.98	1
P23396	40S ribosomal protein S3 OS=Homo sapiens GN=RPS3 PE=1 SV=2	24242.1	25025.7	25482.3	24753.3	26685.2	24003.9	24633.9	25117.8	25344.6	0.97	0.98	0.99
P62913	60S ribosomal protein L11 OS=Homo sapiens GN=RPL11 PE=1 SV=2	9509	9829.4	10103.3	10293.4	9227.5	10617.8	9669.2	10198.4	9922.7	0.97	0.95	1.03
P39023	60S ribosomal protein L3 OS=Homo sapiens GN=RPL3 PE=1 SV=2	21637.6	19817.8	21032.7	21489.1	20810.1	21924.8	20727.7	21260.9	21367.5	0.97	0.97	1
P62888	60S ribosomal protein L30 OS=Homo sapiens GN=RPL30 PE=1 SV=2	8605.6	9109.6	8721.2	8354.6	9361.2	8882.4	8857.6	8537.9	9121.8	0.97	1.04	0.94
B3KY60	cDNA FLJ16777 fis, clone BRHIP2029567, highly similar to Cell division cycle 5-like protein OS=Homo sapiens PE=2 SV=1	2038.7	2040.4	1883.6	1739.4	2114.9	2093.9	2039.6	1811.5	2104.4	0.97	1.13	0.86
P55884-2	Isoform 2 of Eukaryotic translation initiation factor 3 subunit B OS=Homo sapiens GN=EIF3B	6349.2	6602.5	6213.7	6044.7	6752.3	6647.2	6475.9	6129.2	6699.8	0.97	1.06	0.91
A0A0U1RRM4	Polypyrimidine tract-binding protein 1 OS=Homo sapiens GN=PTBP1 PE=1 SV=1	2118.2	2046.5	2006.8	1948.3	2259.7	2041	2082.4	1977.6	2150.4	0.97	1.05	0.92
Q5T1Z8	Pumilio homolog 1 OS=Homo sapiens GN=PUM1 PE=1 SV=1	1184.6	1498.8	1143.3	1095.5	1466.6	1302.9	1341.7	1119.4	1384.8	0.97	1.2	0.81
P62820	Ras-related protein Rab-1A OS=Homo sapiens GN=RAB1A PE=1 SV=3	521.6	697	510.7	396.4	756.8	502.3	609.3	453.6	629.6	0.97	1.34	0.72
Q14232	Translation initiation factor eIF-2B subunit alpha OS=Homo sapiens GN=EIF2B1 PE=1 SV=1	534.9	449.7	517.8	487.6	459.4	559	492.3	502.7	509.2	0.97	0.98	0.99
E7ERK9	Translation initiation factor eIF-2B subunit delta OS=Homo sapiens GN=EIF2B4 PE=1 SV=1	287.7	220.6	268	239.7	251.7	274.5	254.2	253.9	263.1	0.97	1	0.96
P62280	40S ribosomal protein S11 OS=Homo sapiens GN=RPS11 PE=1 SV=3	10815.8	11288.3	11168.1	11263.9	12368.8	10457.2	11052.1	11216	11413	0.97	0.99	0.98
P40429	60S ribosomal protein L13a OS=Homo sapiens GN=RPL13A PE=1 SV=2	12235.7	11502.5	11944.9	11797.1	12510.9	12077	11869.1	11871	12294	0.97	1	0.97
Q9BY77	Polymerase delta-interacting protein 3 OS=Homo sapiens GN=POLDIP3 PE=1 SV=2	735.6	700.8	585.2	534.2	689.4	802.3	718.2	559.7	745.9	0.96	1.28	0.75
Q9NY93	Probable ATP-dependent RNA helicase DDX56 OS=Homo sapiens GN=DDX56 PE=1 SV=1	95.7	75.5	78.1	69.8	99.7	78.1	85.6	74	88.9	0.96	1.16	0.83
Q9BRT6	Protein LLP homolog OS=Homo sapiens GN=LLPH PE=1 SV=1	563	454.3	533.7	441.8	572	484.1	508.7	487.8	528.1	0.96	1.04	0.92
P62273	40S ribosomal protein S29 OS=Homo sapiens GN=RPS29 PE=1 SV=2	1351.6	1140.5	1252.2	1158	1403.1	1180.3	1246.1	1205.1	1291.7	0.96	1.03	0.93
P62424	60S ribosomal protein L7a OS=Homo sapiens GN=RPL7A PE=1 SV=2	19357	17693	18965.6	18544.6	18470.2	19931.8	18525	18755.1	19201	0.96	0.99	0.98
O75821	Eukaryotic translation initiation factor 3 subunit G OS=Homo sapiens GN=EIF3G PE=1 SV=2	2284.3	2523.2	2414.6	2323	2618.1	2403.5	2403.8	2368.8	2510.8	0.96	1.01	0.94
Q08945	FACT complex subunit SSRP1 OS=Homo sapiens GN=SSRP1 PE=1 SV=1	182.7	178.5	178.3	151.1	177.9	199.7	180.6	164.7	188.8	0.96	1.1	0.87
O75934	Pre-mRNA-splicing factor SPF27 OS=Homo sapiens GN=BCAS2 PE=1 SV=1	460.5	461.2	499.4	380.5	489.8	472	460.9	440	480.9	0.96	1.05	0.91
P40937	Replication factor C subunit 5 OS=Homo sapiens GN=RFC5 PE=1 SV=1	218.7	235.5	232.7	197.3	248.2	223.8	227.1	215	236	0.96	1.06	0.91
Q00577	Transcriptional activator protein Pur-alpha OS=Homo sapiens GN=PURA PE=1 SV=2	1548.7	1507.9	1546.1	1466.9	1671.3	1514.5	1528.3	1506.5	1592.9	0.96	1.01	0.95
P08621	U1 small nuclear ribonucleoprotein 70 kDa OS=Homo sapiens GN=SNRNP70 PE=1 SV=2	897.6	973.2	786.4	795.3	966.5	982.5	935.4	790.9	974.5	0.96	1.18	0.81
P62753	40S ribosomal protein S6 OS=Homo sapiens GN=RPS6 PE=1 SV=1	17457.8	16635.3	17075.8	17414.7	18596.9	16932.6	17046.6	17245.3	17764.8	0.96	0.99	0.97
P47914	60S ribosomal protein L29 OS=Homo sapiens GN=RPL29 PE=1 SV=2	2209	2028.7	1910.4	1761.8	2406.2	2013.6	2118.9	1836.1	2209.9	0.96	1.15	0.83
Q9UBQ5	Eukaryotic translation initiation factor 3 subunit K OS=Homo sapiens GN=EIF3K PE=1 SV=1	1716.1	1644.1	2166.2	1700.4	1791.5	1724.4	1680.1	1933.3	1758	0.96	0.87	1.1
P62701	40S ribosomal protein S4, X isoform OS=Homo sapiens GN=RPS4X PE=1 SV=2	20290.6	19780.2	21628.1	20819	21612.4	20345.8	20035.4	21223.6	20979.1	0.96	0.94	1.01
P62258	14-3-3 protein epsilon OS=Homo sapiens GN=YWHAE PE=1 SV=1	2938.5	3431.9	4003.3	3546.9	3516.3	3186.6	3185.2	3775.1	3351.5	0.95	0.84	1.13
P13807	Glycogen [starch] synthase, muscle OS=Homo sapiens GN=GYS1 PE=1 SV=2	23407.6	14315	10704.4	9560.2	22156.3	17556.8	18861.3	10132.3	19856.6	0.95	1.86	0.51
A0A0G2JIW1	Heat shock 70 kDa protein 1B OS=Homo sapiens GN=HSPA1B PE=1 SV=1	1144.9	1248.1	1100.7	903.3	1397.8	1119.1	1196.5	1002	1258.5	0.95	1.19	0.8
Q15717-2	Isoform 2 of ELAV-like protein 1 OS=Homo sapiens GN=ELAVL1	2798.7	2878.3	2800.1	2604.4	3115.4	2862.9	2838.5	2702.3	2989.2	0.95	1.05	0.9
O43399-7	Isoform 7 of Tumor protein D54 OS=Homo sapiens GN=TPD52L2	493.1	411.5	448.5	315	442.7	505.8	452.3	381.8	474.3	0.95	1.18	0.8
Q09161	Nuclear cap-binding protein subunit 1 OS=Homo sapiens GN=NCBP1 PE=1 SV=1	322.7	328.4	394.9	341.1	331.2	354.2	325.6	368	342.7	0.95	0.88	1.07
Q9BZI7	Regulator of nonsense transcripts 3B OS=Homo sapiens GN=UPF3B PE=1 SV=1	290.7	271.1	315.8	289.5	299.4	289.4	280.9	302.7	294.4	0.95	0.93	1.03
O75533	Splicing factor 3B subunit 1 OS=Homo sapiens GN=SF3B1 PE=1 SV=3	880.3	965	867.3	717	905.7	1027.9	922.7	792.2	966.8	0.95	1.16	0.82
P62979	Ubiquitin-40S ribosomal protein S27a OS=Homo sapiens GN=RPS27A PE=1 SV=2	2706.4	2460.6	2595	2505.5	2971.5	2462.3	2583.5	2550.3	2716.9	0.95	1.01	0.94
Q96KR1	Zinc finger RNA-binding protein OS=Homo sapiens GN=ZFR PE=1 SV=2	1392.4	1320.3	1507.8	1138.9	1561	1293.9	1356.4	1323.4	1427.5	0.95	1.02	0.93
K7ELC2	40S ribosomal protein S15 OS=Homo sapiens GN=RPS15 PE=1 SV=1	10077.3	7757.3	8660.7	9000.9	9593.3	9130	8917.3	8830.8	9361.7	0.95	1.01	0.94
P61313	60S ribosomal protein L15 OS=Homo sapiens GN=RPL15 PE=1 SV=2	7102.8	6730.7	6991.6	7191.5	7285.5	7248.2	6916.8	7091.6	7266.9	0.95	0.98	0.98
P62899	60S ribosomal protein L31 OS=Homo sapiens GN=RPL31 PE=1 SV=1	7337.4	6700.9	7192.3	7147.2	7357.1	7400.6	7019.2	7169.8	7378.9	0.95	0.98	0.97
Q9H2U1	ATP-dependent RNA helicase DHX36 OS=Homo sapiens GN=DHX36 PE=1 SV=2	961.5	1048	1000.8	994.3	1047.8	1073.1	1004.8	997.6	1060.5	0.95	1.01	0.94
P62913-2	Isoform 2 of 60S ribosomal protein L11 OS=Homo sapiens GN=RPL11	96.5	87.3	122.6	124.7	76	118.4	91.9	123.7	97.2	0.95	0.74	1.27
B3KT93	Polyadenylate-binding protein OS=Homo sapiens PE=2 SV=1	17550.3	17843	19173.5	18743.9	19450.3	17895.2	17696.7	18958.7	18672.8	0.95	0.93	1.02
P35249	Replication factor C subunit 4 OS=Homo sapiens GN=RFC4 PE=1 SV=2	685.7	587.9	570.5	514.3	653.7	689.2	636.8	542.4	671.5	0.95	1.17	0.81
E9PAU2	Ribonucleoprotein PTB-binding 1 OS=Homo sapiens GN=RAVER1 PE=1 SV=1	363.8	460.3	363	305.3	503	366.6	412.1	334.2	434.8	0.95	1.23	0.77
Q6NZY4	Zinc finger CCHC domain-containing protein 8 OS=Homo sapiens GN=ZCCHC8 PE=1 SV=2	59.6	52.7	63.3	61.9	54.6	64	56.2	62.6	59.3	0.95	0.9	1.06
F8W7C6	60S ribosomal protein L10 OS=Homo sapiens GN=RPL10 PE=1 SV=2	2229.1	2148	2105.2	2185.8	2304.6	2315.2	2188.6	2145.5	2309.9	0.95	1.02	0.93
P46779	60S ribosomal protein L28 OS=Homo sapiens GN=RPL28 PE=1 SV=3	6906.8	5556.3	6073.9	5986.2	7006.4	6179.2	6231.6	6030.1	6592.8	0.95	1.03	0.91
P42766	60S ribosomal protein L35 OS=Homo sapiens GN=RPL35 PE=1 SV=2	5352.7	5424.5	5116.2	5107.2	6411.4	5002	5388.6	5111.7	5706.7	0.94	1.05	0.9
P04406	Glyceraldehyde-3-phosphate dehydrogenase OS=Homo sapiens GN=GAPDH PE=1 SV=3	2974.4	1505.2	1365.3	1122.2	3101.8	1652.3	2239.8	1243.8	2377.1	0.94	1.8	0.52
O60506	Heterogeneous nuclear ribonucleoprotein Q OS=Homo sapiens GN=SYNCRIP PE=1 SV=2	19778.1	22737.4	22672.9	23328.6	23132.7	22275	21257.8	23000.8	22703.9	0.94	0.92	1.01
A0A0A0MR39	Myelin expression factor 2 OS=Homo sapiens GN=MYEF2 PE=1 SV=1	151.3	176.8	174.4	145.1	178.7	169.5	164.1	159.8	174.1	0.94	1.03	0.92
Q9UMS4	Pre-mRNA-processing factor 19 OS=Homo sapiens GN=PRPF19 PE=1 SV=1	2617.4	2781.5	2639	2310.8	3047.3	2694.6	2699.5	2474.9	2871	0.94	1.09	0.86
Q8NI27	THO complex subunit 2 OS=Homo sapiens GN=THOC2 PE=1 SV=2	593.8	687.9	618.2	525.9	649	710.5	640.9	572.1	679.8	0.94	1.12	0.84
C9J6P4	Zinc finger CCCH-type antiviral protein 1 OS=Homo sapiens GN=ZC3HAV1 PE=1 SV=1	948	1076.8	956.8	926.7	1101.8	1054.8	1012.4	941.8	1078.3	0.94	1.08	0.87
Q9NUD5	Zinc finger CCHC domain-containing protein 3 OS=Homo sapiens GN=ZCCHC3 PE=1 SV=1	565.8	596	589.7	510.1	631.1	601.9	580.9	549.9	616.5	0.94	1.06	0.89
P61254	60S ribosomal protein L26 OS=Homo sapiens GN=RPL26 PE=1 SV=1	5566.6	4779.2	4937.7	4668.6	6069.1	4912.9	5172.9	4803.2	5491	0.94	1.08	0.87
A0A0U1RQK7	Eukaryotic translation initiation factor 4 gamma 3 OS=Homo sapiens GN=EIF4G3 PE=1 SV=1	745.6	599.3	678.7	544.3	687.2	749.6	672.5	611.5	718.4	0.94	1.1	0.85
Q13243	Serine/arginine-rich splicing factor 5 OS=Homo sapiens GN=SRSF5 PE=1 SV=1	129	141.5	133	119.8	155.6	133.9	135.3	126.4	144.8	0.93	1.07	0.87
Q9Y224	UPF0568 protein C14orf166 OS=Homo sapiens GN=C14orf166 PE=1 SV=1	3034.5	3582.1	3746.4	3518.4	3422.1	3673.3	3308.3	3632.4	3547.7	0.93	0.91	1.02
P30050	60S ribosomal protein L12 OS=Homo sapiens GN=RPL12 PE=1 SV=1	9327.4	8684.5	9465.1	9284.8	9949.3	9323.1	9006	9375	9636.2	0.93	0.96	0.97
P60709	Actin, cytoplasmic 1 OS=Homo sapiens GN=ACTB PE=1 SV=1	662.4	587.7	630	475	745	605.1	625.1	552.5	675.1	0.93	1.13	0.82
Q7Z6E9	E3 ubiquitin-protein ligase RBBP6 OS=Homo sapiens GN=RBBP6 PE=1 SV=1	96.3	83.4	91.7	76	91.9	102.1	89.9	83.9	97	0.93	1.07	0.86
P84090	Enhancer of rudimentary homolog OS=Homo sapiens GN=ERH PE=1 SV=1	1535.3	1756.7	1437.9	1064.9	1911.3	1645.5	1646	1251.4	1778.4	0.93	1.32	0.7
P11142	Heat shock cognate 71 kDa protein OS=Homo sapiens GN=HSPA8 PE=1 SV=1	1859.2	2174.6	1953.7	1673.3	2345.9	2007.9	2016.9	1813.5	2176.9	0.93	1.11	0.83
Q9BUJ2	Heterogeneous nuclear ribonucleoprotein U-like protein 1 OS=Homo sapiens GN=HNRNPUL1 PE=1 SV=2	213.8	195.4	229.3	260.4	242.2	198.6	204.6	244.9	220.4	0.93	0.84	1.11
Q8N5L8	Ribonuclease P protein subunit p25-like protein OS=Homo sapiens GN=RPP25L PE=1 SV=1	80.8	75.6	103	77.6	77.8	91.1	78.2	90.3	84.5	0.93	0.87	1.07
P46777	60S ribosomal protein L5 OS=Homo sapiens GN=RPL5 PE=1 SV=3	16668	15663.4	16912.7	17151.7	17017.4	17870.1	16165.7	17032.2	17443.8	0.93	0.95	0.98
Q13151	Heterogeneous nuclear ribonucleoprotein A0 OS=Homo sapiens GN=HNRNPA0 PE=1 SV=1	1400.9	1361	1403.8	1147.6	1594.6	1391.5	1381	1275.7	1493.1	0.92	1.08	0.85
P52597	Heterogeneous nuclear ribonucleoprotein F OS=Homo sapiens GN=HNRNPF PE=1 SV=3	526.6	546.1	459.8	403.3	631.7	528	536.4	431.6	579.9	0.92	1.24	0.74
P61513	60S ribosomal protein L37a OS=Homo sapiens GN=RPL37A PE=1 SV=2	5061.3	4793.8	5465.5	5110.1	5239	5427.7	4927.6	5287.8	5333.4	0.92	0.93	0.99
P12277	Creatine kinase B-type OS=Homo sapiens GN=CKB PE=1 SV=1	696.6	534.8	544.4	411.8	733.4	606	615.7	478.1	669.7	0.92	1.29	0.71
P06730-2	Isoform 2 of Eukaryotic translation initiation factor 4E OS=Homo sapiens GN=EIF4E	1189	1073.5	1307.2	1224.4	1255.3	1201.2	1131.3	1265.8	1228.3	0.92	0.89	1.03
Q15366-3	Isoform 3 of Poly(rC)-binding protein 2 OS=Homo sapiens GN=PCBP2	1047.8	1184.2	1187.3	1054.1	1282.2	1151	1116	1120.7	1216.6	0.92	1	0.92
Q13428-4	Isoform 4 of Treacle protein OS=Homo sapiens GN=TCOF1	2465.9	2181.8	2112.7	1942.5	2713.1	2323.5	2323.9	2027.6	2518.3	0.92	1.15	0.81
O75494	Serine/arginine-rich splicing factor 10 OS=Homo sapiens GN=SRSF10 PE=1 SV=1	344.1	351.8	326.6	287.6	372.5	384.2	348	307.1	378.4	0.92	1.13	0.81
P63173	60S ribosomal protein L38 OS=Homo sapiens GN=RPL38 PE=1 SV=2	11076.3	9089.8	9315.6	9232.5	12162.8	9698.2	10083.1	9274.1	10930.5	0.92	1.09	0.85
P78371	T-complex protein 1 subunit beta OS=Homo sapiens GN=CCT2 PE=1 SV=4	776.2	804.1	716.5	600.2	931.2	794.1	790.2	658.4	862.7	0.92	1.2	0.76
O43395	U4/U6 small nuclear ribonucleoprotein Prp3 OS=Homo sapiens GN=PRPF3 PE=1 SV=2	156.5	173.2	152.3	127.2	194.6	165.2	164.9	139.8	179.9	0.92	1.18	0.78
P84098	60S ribosomal protein L19 OS=Homo sapiens GN=RPL19 PE=1 SV=1	7527.4	6625.6	7071.6	6824.5	7873.6	7584.2	7076.5	6948.1	7728.9	0.92	1.02	0.9
Q6P2Q9	Pre-mRNA-processing-splicing factor 8 OS=Homo sapiens GN=PRPF8 PE=1 SV=2	3340.2	3499.9	3009.8	2660	4068.4	3433.1	3420.1	2834.9	3750.8	0.91	1.21	0.76
Q9Y2W1	Thyroid hormone receptor-associated protein 3 OS=Homo sapiens GN=THRAP3 PE=1 SV=2	1317.4	1461.2	1251.2	989.2	1672.5	1367.9	1389.3	1120.2	1520.2	0.91	1.24	0.74
P27348	14-3-3 protein theta OS=Homo sapiens GN=YWHAQ PE=1 SV=1	161.1	184	210.3	185.6	176.3	204.6	172.6	198	190.5	0.91	0.87	1.04
S4R3H4	Apoptotic chromatin condensation inducer in the nucleus OS=Homo sapiens GN=ACIN1 PE=1 SV=1	1556.7	1916.1	1433.9	1309.7	2034.3	1795	1736.4	1371.8	1914.7	0.91	1.27	0.72
Q9H9A5	CCR4-NOT transcription complex subunit 10 OS=Homo sapiens GN=CNOT10 PE=1 SV=1	691.5	702.5	626.6	594.9	767.6	770.1	697	610.8	768.9	0.91	1.14	0.79
O00425	Insulin-like growth factor 2 mRNA-binding protein 3 OS=Homo sapiens GN=IGF2BP3 PE=1 SV=2	6977.5	8049.1	7092	6867.5	8726.4	7857.9	7513.3	6979.8	8292.2	0.91	1.08	0.84
O60306	Intron-binding protein aquarius OS=Homo sapiens GN=AQR PE=1 SV=4	159.3	111.3	139.4	114.7	151.2	147.6	135.3	127.1	149.4	0.91	1.06	0.85
Q07666	KH domain-containing, RNA-binding, signal transduction-associated protein 1 OS=Homo sapiens GN=KHDRBS1 PE=1 SV=1	767.9	903.1	719.6	649.6	1006.6	835.9	835.5	684.6	921.3	0.91	1.22	0.74
Q5JSZ5	Protein PRRC2B OS=Homo sapiens GN=PRRC2B PE=1 SV=2	1069.4	1005.4	1085.6	1045.5	1190.8	1091.7	1037.4	1065.6	1141.3	0.91	0.97	0.93
O75817	Ribonuclease P protein subunit p20 OS=Homo sapiens GN=POP7 PE=1 SV=2	195.7	153.8	128.6	174.7	221	164.4	174.8	151.7	192.7	0.91	1.15	0.79
Q15287	RNA-binding protein with serine-rich domain 1 OS=Homo sapiens GN=RNPS1 PE=1 SV=1	462.5	388	384.5	348.3	431.9	507.4	425.3	366.4	469.7	0.91	1.16	0.78
Q15427	Splicing factor 3B subunit 4 OS=Homo sapiens GN=SF3B4 PE=1 SV=1	61.1	61.8	53.4	52.6	70.3	65	61.5	53	67.7	0.91	1.16	0.78
Q9Y4W2	Ribosomal biogenesis protein LAS1L OS=Homo sapiens GN=LAS1L PE=1 SV=2	402.8	380.9	364.3	302.3	424.9	441.2	391.9	333.3	433.1	0.9	1.18	0.77
Q15650	Activating signal cointegrator 1 OS=Homo sapiens GN=TRIP4 PE=1 SV=4	143.9	122.4	138.9	137.6	152	142.6	133.2	138.3	147.3	0.9	0.96	0.94
O15371	Eukaryotic translation initiation factor 3 subunit D OS=Homo sapiens GN=EIF3D PE=1 SV=1	3605.3	3761.1	3838.8	3770.7	4346	3845.9	3683.2	3804.8	4096	0.9	0.97	0.93
O14893	Gem-associated protein 2 OS=Homo sapiens GN=GEMIN2 PE=1 SV=1	762.3	737.8	729.9	645.2	824.9	845.2	750.1	687.6	835.1	0.9	1.09	0.82
P57678	Gem-associated protein 4 OS=Homo sapiens GN=GEMIN4 PE=1 SV=2	1703.8	1665.7	1717.6	1527.5	1763.5	1983.4	1684.8	1622.6	1873.5	0.9	1.04	0.87
P52292	Importin subunit alpha-1 OS=Homo sapiens GN=KPNA2 PE=1 SV=1	241.6	271.7	229.1	205.2	345	225.4	256.7	217.2	285.2	0.9	1.18	0.76
O43143	Pre-mRNA-splicing factor ATP-dependent RNA helicase DHX15 OS=Homo sapiens GN=DHX15 PE=1 SV=2	714.3	724.9	669.6	600.3	848.3	747.1	719.6	635	797.7	0.9	1.13	0.8
Q9UKM9	RNA-binding protein Raly OS=Homo sapiens GN=RALY PE=1 SV=1	1509.3	1646.4	1439.8	1240.5	1910.5	1582.6	1577.9	1340.2	1746.6	0.9	1.18	0.77
Q9Y3B4	Splicing factor 3B subunit 6 OS=Homo sapiens GN=SF3B6 PE=1 SV=1	142.3	125.9	128.6	120.6	138	160.3	134.1	124.6	149.2	0.9	1.08	0.84
P40227	T-complex protein 1 subunit zeta OS=Homo sapiens GN=CCT6A PE=1 SV=3	1039.3	1140.6	902.4	788.9	1454	968.8	1090	845.7	1211.4	0.9	1.29	0.7
Q96FX7	tRNA (adenine(58)-N(1))-methyltransferase catalytic subunit TRMT61A OS=Homo sapiens GN=TRMT61A PE=1 SV=1	75.1	69	81.7	87.2	78.4	81.5	72.1	84.5	80	0.9	0.85	1.06
J3KQN4	60S ribosomal protein L36a OS=Homo sapiens GN=RPL36A PE=3 SV=1	4425.1	3349.1	3603	3333.6	5099.7	3552.9	3887.1	3468.3	4326.3	0.9	1.12	0.8
Q5BKZ1	DBIRD complex subunit ZNF326 OS=Homo sapiens GN=ZNF326 PE=1 SV=2	186.7	199.4	182.9	149.9	227.8	203.1	193.1	166.4	215.5	0.9	1.16	0.77
Q99453	Paired mesoderm homeobox protein 2B OS=Homo sapiens GN=PHOX2B PE=1 SV=2	131.8	94.3	110.6	80.5	131.2	120.8	113.1	95.6	126	0.9	1.18	0.76
B3KMB1	Structural maintenance of chromosomes protein OS=Homo sapiens PE=2 SV=1	252.8	211.5	226.7	163.8	269.5	248.9	232.2	195.3	259.2	0.9	1.19	0.75
P62241	40S ribosomal protein S8 OS=Homo sapiens GN=RPS8 PE=1 SV=2	19161.6	18699.1	19101.6	18981.8	22808	19380.3	18930.4	19041.7	21094.2	0.9	0.99	0.9
P61927	60S ribosomal protein L37 OS=Homo sapiens GN=RPL37 PE=1 SV=2	3038.2	2615.4	3046.1	3043.9	3179.6	3133.2	2826.8	3045	3156.4	0.9	0.93	0.96
Q9NVU7	Protein SDA1 homolog OS=Homo sapiens GN=SDAD1 PE=1 SV=3	229.1	254.1	283.2	224.4	282.1	259.5	241.6	253.8	270.8	0.89	0.95	0.94
Q13435	Splicing factor 3B subunit 2 OS=Homo sapiens GN=SF3B2 PE=1 SV=2	1030.5	1112.3	921.4	822	1371.2	1025.5	1071.4	871.7	1198.4	0.89	1.23	0.73
Q9NXF1	Testis-expressed sequence 10 protein OS=Homo sapiens GN=TEX10 PE=1 SV=2	879.8	939.9	813.5	682.4	997.4	1041.1	909.9	748	1019.3	0.89	1.22	0.73
Q8IZH2	5'-3' exoribonuclease 1 OS=Homo sapiens GN=XRN1 PE=1 SV=1	373.6	393	331.3	310.1	464.4	399.3	383.3	320.7	431.9	0.89	1.2	0.74
Q99700	Ataxin-2 OS=Homo sapiens GN=ATXN2 PE=1 SV=2	1031.5	1091.6	1086.5	1074	1229.7	1152.4	1061.6	1080.3	1191.1	0.89	0.98	0.91
P80723	Brain acid soluble protein 1 OS=Homo sapiens GN=BASP1 PE=1 SV=2	102.7	82.8	91.6	58.4	107.4	100.8	92.8	75	104.1	0.89	1.24	0.72
A0A0A0MTC5	Double-stranded RNA-binding protein Staufen homolog 2 OS=Homo sapiens GN=STAU2 PE=1 SV=1	1215.2	1109	1047.7	1012.9	1431.1	1178.4	1162.1	1030.3	1304.8	0.89	1.13	0.79
Q9H840	Gem-associated protein 7 OS=Homo sapiens GN=GEMIN7 PE=1 SV=1	110.6	89.4	102.2	89.4	89.6	136	100	95.8	112.8	0.89	1.04	0.85
P14866	Heterogeneous nuclear ribonucleoprotein L OS=Homo sapiens GN=HNRNPL PE=1 SV=2	4729.1	7455.5	4428.8	4277.4	8027.3	5691.1	6092.3	4353.1	6859.2	0.89	1.4	0.63
X6RAL5	Histone deacetylase complex subunit SAP18 OS=Homo sapiens GN=SAP18 PE=1 SV=1	397	429.2	405.6	334.7	523.8	406.5	413.1	370.2	465.2	0.89	1.12	0.8
A8MXP9	Matrin-3 OS=Homo sapiens GN=MATR3 PE=1 SV=1	6844.2	7045.9	5990.7	5363.4	8395.9	7271.6	6945.1	5677.1	7833.8	0.89	1.22	0.72
B1AHD1	NHP2-like protein 1 OS=Homo sapiens GN=SNU13 PE=1 SV=1	125.2	133.2	147.6	120.1	145.7	145.2	129.2	133.9	145.5	0.89	0.97	0.92
Q15154	Pericentriolar material 1 protein OS=Homo sapiens GN=PCM1 PE=1 SV=4	1806.1	1862.6	1575.2	1369.7	2275.5	1841	1834.4	1472.5	2058.3	0.89	1.25	0.72
Q9NSD9	Phenylalanine--tRNA ligase beta subunit OS=Homo sapiens GN=FARSB PE=1 SV=3	1072.7	1259.9	1645	1407.4	1219	1398.7	1166.3	1526.2	1308.9	0.89	0.76	1.17
O76021	Ribosomal L1 domain-containing protein 1 OS=Homo sapiens GN=RSL1D1 PE=1 SV=3	1266.5	1262.8	1348.3	1340.1	1546.2	1299.7	1264.7	1344.2	1423	0.89	0.94	0.94
P62136-2	Isoform 2 of Serine/threonine-protein phosphatase PP1-alpha catalytic subunit OS=Homo sapiens GN=PPP1CA	143.9	170.2	157.9	158.9	171.6	185.4	157.1	158.4	178.5	0.88	0.99	0.89
Q8WYQ5	Microprocessor complex subunit DGCR8 OS=Homo sapiens GN=DGCR8 PE=1 SV=1	292.2	280.3	337.8	260	363.1	285	286.3	298.9	324.1	0.88	0.96	0.92
Q9BU76	Multiple myeloma tumor-associated protein 2 OS=Homo sapiens GN=MMTAG2 PE=1 SV=1	252.9	176.6	182.8	163.5	236.1	249.7	214.8	173.2	242.9	0.88	1.24	0.71
A0A087WX23	Retrotransposon-derived protein PEG10 OS=Homo sapiens GN=PEG10 PE=1 SV=1	264.8	286.9	251.3	240.5	327.6	296.7	275.9	245.9	312.2	0.88	1.12	0.79
Q9Y265	RuvB-like 1 OS=Homo sapiens GN=RUVBL1 PE=1 SV=1	1612.6	1758.2	1529.7	1351.2	2079.4	1736.4	1685.4	1440.5	1907.9	0.88	1.17	0.75
P35030	Trypsin-3 OS=Homo sapiens GN=PRSS3 PE=1 SV=2	1006.9	669.8	635.9	540.3	954.9	947	838.4	588.1	951	0.88	1.43	0.62
O75152	Zinc finger CCCH domain-containing protein 11A OS=Homo sapiens GN=ZC3H11A PE=1 SV=3	759	914.8	791.2	675.3	1029.3	869.8	836.9	733.3	949.6	0.88	1.14	0.77
Q13310-3	Isoform 3 of Polyadenylate-binding protein 4 OS=Homo sapiens GN=PABPC4	11484.3	10938.1	12617.7	12777.5	13718.4	11812.1	11211.2	12697.6	12765.3	0.88	0.88	0.99
Q13427	Peptidyl-prolyl cis-trans isomerase G OS=Homo sapiens GN=PPIG PE=1 SV=2	197.3	184.7	197	148.3	220.2	214.7	191	172.7	217.5	0.88	1.11	0.79
Q8ND56	Protein LSM14 homolog A OS=Homo sapiens GN=LSM14A PE=1 SV=3	1233.6	1199.7	1273.3	1216.1	1527.8	1250	1216.7	1244.7	1388.9	0.88	0.98	0.9
P48634	Protein PRRC2A OS=Homo sapiens GN=PRRC2A PE=1 SV=3	2184.8	2411.5	2309.2	2331.2	2867.3	2359.1	2298.2	2320.2	2613.2	0.88	0.99	0.89
P22087	rRNA 2'-O-methyltransferase fibrillarin OS=Homo sapiens GN=FBL PE=1 SV=2	2408	2248.5	2058.4	1899.7	2807.1	2504.3	2328.3	1979.1	2655.7	0.88	1.18	0.75
P62857	40S ribosomal protein S28 OS=Homo sapiens GN=RPS28 PE=1 SV=1	3506.4	2883.9	3320.7	3638.7	3665.5	3610.3	3195.2	3479.7	3637.9	0.88	0.92	0.96
P51991	Heterogeneous nuclear ribonucleoprotein A3 OS=Homo sapiens GN=HNRNPA3 PE=1 SV=2	1223.9	1481	1393.9	1299.4	1715.2	1395.3	1352.5	1346.7	1555.3	0.87	1	0.87
P78362-2	Isoform 2 of SRSF protein kinase 2 OS=Homo sapiens GN=SRPK2	374.8	393.8	422.4	332.2	456.3	425.9	384.3	377.3	441.1	0.87	1.02	0.86
O00410-3	Isoform 3 of Importin-5 OS=Homo sapiens GN=IPO5	63.8	86.1	77.4	73.4	66.8	105.2	75	75.4	86	0.87	0.99	0.88
P07195	L-lactate dehydrogenase B chain OS=Homo sapiens GN=LDHB PE=1 SV=2	198.4	192	122.3	117.4	294.9	154.5	195.2	119.9	224.7	0.87	1.63	0.53
Q13573	SNW domain-containing protein 1 OS=Homo sapiens GN=SNW1 PE=1 SV=1	395.6	416.1	361.9	337.9	494.5	440.7	405.9	349.9	467.6	0.87	1.16	0.75
P62266	40S ribosomal protein S23 OS=Homo sapiens GN=RPS23 PE=1 SV=3	7551	7297.7	8263.3	8398	8943.3	8087.4	7424.4	8330.7	8515.4	0.87	0.89	0.98
U3KQP1	Asparagine synthetase domain-containing protein 1 (Fragment) OS=Homo sapiens GN=ASNSD1 PE=1 SV=1	150.6	190.7	142.8	134.5	207.8	186	170.7	138.7	196.9	0.87	1.23	0.7
P16989	Y-box-binding protein 3 OS=Homo sapiens GN=YBX3 PE=1 SV=4	2800.7	2880.6	2791.4	2699.7	3610.7	2940.7	2840.7	2745.6	3275.7	0.87	1.03	0.84
Q96CT7	Coiled-coil domain-containing protein 124 OS=Homo sapiens GN=CCDC124 PE=1 SV=1	1725.8	1886.8	1621.4	1410.1	2166.5	2018.3	1806.3	1515.8	2092.4	0.86	1.19	0.72
Q14694-2	Isoform 2 of Ubiquitin carboxyl-terminal hydrolase 10 OS=Homo sapiens GN=USP10	2155.8	2302.4	2386.7	2222.7	2532.8	2623.1	2229.1	2304.7	2578	0.86	0.97	0.89
Q15365	Poly(rC)-binding protein 1 OS=Homo sapiens GN=PCBP1 PE=1 SV=2	445.7	413.9	459.3	401	453	540.9	429.8	430.2	497	0.86	1	0.87
Q9H6S0	Probable ATP-dependent RNA helicase YTHDC2 OS=Homo sapiens GN=YTHDC2 PE=1 SV=2	942.5	1026.2	972.5	955.2	1132.2	1148.9	984.4	963.9	1140.6	0.86	1.02	0.85
Q6ZN17	Protein lin-28 homolog B OS=Homo sapiens GN=LIN28B PE=1 SV=1	454.5	439.5	518.6	513.3	558.8	475.4	447	516	517.1	0.86	0.87	1
Q96MX6	WD repeat-containing protein 92 OS=Homo sapiens GN=WDR92 PE=1 SV=1	118.7	65.8	62.9	57.5	149.6	64.3	92.3	60.2	107	0.86	1.53	0.56
P22626	Heterogeneous nuclear ribonucleoproteins A2/B1 OS=Homo sapiens GN=HNRNPA2B1 PE=1 SV=2	2343.6	2618.3	2748.6	2051.2	3170.2	2607.8	2481	2399.9	2889	0.86	1.03	0.83
Q9NZI8	Insulin-like growth factor 2 mRNA-binding protein 1 OS=Homo sapiens GN=IGF2BP1 PE=1 SV=2	11122	11393	11873	11237	13833.3	12399.7	11257.5	11555	13116.5	0.86	0.97	0.88
Q99729-3	Isoform 3 of Heterogeneous nuclear ribonucleoprotein A/B OS=Homo sapiens GN=HNRNPAB	3043.2	4163.1	4257.4	4068.8	4400.4	3985	3603.2	4163.1	4192.7	0.86	0.87	0.99
Q9NZB2-6	Isoform F of Constitutive coactivator of PPAR-gamma-like protein 1 OS=Homo sapiens GN=FAM120A	3763.8	4218.8	3863.2	3503.8	4950.8	4357.3	3991.3	3683.5	4654.1	0.86	1.08	0.79
Q9H307	Pinin OS=Homo sapiens GN=PNN PE=1 SV=4	1309.2	1277.4	1202.8	1114.5	1551.5	1459.8	1293.3	1158.7	1505.7	0.86	1.12	0.77
H3BLZ8	Probable ATP-dependent RNA helicase DDX17 OS=Homo sapiens GN=DDX17 PE=1 SV=1	208.7	261.4	245.8	204.1	270.3	275.6	235.1	225	273	0.86	1.04	0.82
Q96GQ7	Probable ATP-dependent RNA helicase DDX27 OS=Homo sapiens GN=DDX27 PE=1 SV=2	402.1	427.2	419.3	365.1	506	462.5	414.7	392.2	484.3	0.86	1.06	0.81
J3QS41	Probable helicase with zinc finger domain OS=Homo sapiens GN=HELZ PE=1 SV=1	714.6	628.4	647.8	604.6	811	754.9	671.5	626.2	783	0.86	1.07	0.8
P49756	RNA-binding protein 25 OS=Homo sapiens GN=RBM25 PE=1 SV=3	488.3	472.5	411	371.3	613.9	507.8	480.4	391.2	560.9	0.86	1.23	0.7
Q15459	Splicing factor 3A subunit 1 OS=Homo sapiens GN=SF3A1 PE=1 SV=1	419.8	419.7	361.9	312.3	510	470.7	419.8	337.1	490.4	0.86	1.25	0.69
P26640	Valine--tRNA ligase OS=Homo sapiens GN=VARS PE=1 SV=4	198.7	201.5	222.9	196.5	235	230.4	200.1	209.7	232.7	0.86	0.95	0.9
P49207	60S ribosomal protein L34 OS=Homo sapiens GN=RPL34 PE=1 SV=3	8646.9	8208.6	8313.4	9258.5	11013.7	8664.8	8427.8	8786	9839.3	0.86	0.96	0.89
A0A087WW66	26S proteasome non-ATPase regulatory subunit 1 OS=Homo sapiens GN=PSMD1 PE=1 SV=1	40.3	30.2	34.3	32.4	40.9	41.5	35.3	33.4	41.2	0.86	1.06	0.81
P05556-3	Isoform 3 of Integrin beta-1 OS=Homo sapiens GN=ITGB1	197.8	227.5	224.2	158	307.9	189.3	212.7	191.1	248.6	0.86	1.11	0.77
H7C2Q8	EBNA1 binding protein 2, isoform CRA_d OS=Homo sapiens GN=EBNA1BP2 PE=1 SV=1	229.1	367.2	337.7	295.9	327.3	374.3	298.2	316.8	350.8	0.85	0.94	0.9
P46976	Glycogenin-1 OS=Homo sapiens GN=GYG1 PE=1 SV=4	2435.7	1994	1599.4	1312.3	2862.3	2345.7	2214.9	1455.9	2604	0.85	1.52	0.56
Q9NW13	RNA-binding protein 28 OS=Homo sapiens GN=RBM28 PE=1 SV=3	1111.8	1096.9	1439.7	1393.5	1367.9	1221.9	1104.4	1416.6	1294.9	0.85	0.78	1.09
Q12874	Splicing factor 3A subunit 3 OS=Homo sapiens GN=SF3A3 PE=1 SV=1	157.8	132.7	126.3	128.8	172.5	168.6	145.3	127.6	170.6	0.85	1.14	0.75
P51116	Fragile X mental retardation syndrome-related protein 2 OS=Homo sapiens GN=FXR2 PE=1 SV=2	1987.1	1892	1917.4	1883	2479.7	2095.6	1939.6	1900.2	2287.7	0.85	1.02	0.83
Q71RC2-4	Isoform 4 of La-related protein 4 OS=Homo sapiens GN=LARP4	2910.6	2827	2936.5	2752.4	3618.3	3147.5	2868.8	2844.5	3382.9	0.85	1.01	0.84
P09496-2	Isoform Non-brain of Clathrin light chain A OS=Homo sapiens GN=CLTA	1007.4	929.9	989.2	1064.2	1128.4	1153.8	968.7	1026.7	1141.1	0.85	0.94	0.9
Q8NCA5	Protein FAM98A OS=Homo sapiens GN=FAM98A PE=1 SV=1	1655.5	1641.7	1733.6	1529.3	1985.6	1911.2	1648.6	1631.5	1948.4	0.85	1.01	0.84
Q6I9Y2	THO complex subunit 7 homolog OS=Homo sapiens GN=THOC7 PE=1 SV=3	286	277.3	231.2	237.6	355	309.8	281.7	234.4	332.4	0.85	1.2	0.71
O75396	Vesicle-trafficking protein SEC22b OS=Homo sapiens GN=SEC22B PE=1 SV=4	135.1	139.8	103.2	81.9	175.4	148.9	137.5	92.6	162.2	0.85	1.49	0.57
E9PR30	40S ribosomal protein S30 OS=Homo sapiens GN=FAU PE=1 SV=1	4059.3	3605	4060.3	4552.1	5152.4	3899.3	3832.2	4306.2	4525.9	0.85	0.89	0.95
Q9NYF8	Bcl-2-associated transcription factor 1 OS=Homo sapiens GN=BCLAF1 PE=1 SV=2	1602.6	1454.8	1704.1	1224.9	1968.1	1673.9	1528.7	1464.5	1821	0.84	1.04	0.8
P20645	Cation-dependent mannose-6-phosphate receptor OS=Homo sapiens GN=M6PR PE=1 SV=1	1081.7	846.4	915.1	761	1252.4	1048.1	964.1	838.1	1150.3	0.84	1.15	0.73
P10412	Histone H1.4 OS=Homo sapiens GN=HIST1H1E PE=1 SV=2	3565.5	3363.4	2620.9	2012.9	4651.1	3564.8	3464.5	2316.9	4108	0.84	1.5	0.56
P07910-2	Isoform C1 of Heterogeneous nuclear ribonucleoproteins C1/C2 OS=Homo sapiens GN=HNRNPC	10380	12010.3	9763.2	8738.7	15285.8	11287.9	11195.2	9251	13286.9	0.84	1.21	0.7
Q8IY81	pre-rRNA processing protein FTSJ3 OS=Homo sapiens GN=FTSJ3 PE=1 SV=2	99.5	79.9	80.7	66.4	106.9	105.9	89.7	73.6	106.4	0.84	1.22	0.69
Q99436	Proteasome subunit beta type-7 OS=Homo sapiens GN=PSMB7 PE=1 SV=1	564.5	403.2	391	340.5	662.2	487.8	483.9	365.8	575	0.84	1.32	0.64
P18077	60S ribosomal protein L35a OS=Homo sapiens GN=RPL35A PE=1 SV=2	10735.6	10933.5	12708.4	14043.9	12420	13304.7	10834.6	13376.2	12862.4	0.84	0.81	1.04
Q8WWM7-3	Isoform 3 of Ataxin-2-like protein OS=Homo sapiens GN=ATXN2L	3945.4	4494.6	4206.8	4178.9	5445	4644	4220	4192.9	5044.5	0.84	1.01	0.83
Q06787	Synaptic functional regulator FMR1 OS=Homo sapiens GN=FMR1 PE=1 SV=1	1857.7	1749.4	1966.2	1860	2266.1	2042.9	1803.6	1913.1	2154.5	0.84	0.94	0.89
P09651	Heterogeneous nuclear ribonucleoprotein A1 OS=Homo sapiens GN=HNRNPA1 PE=1 SV=5	689.8	751.2	753.3	664.7	882	848.5	720.5	709	865.3	0.83	1.02	0.82
Q14103	Heterogeneous nuclear ribonucleoprotein D0 OS=Homo sapiens GN=HNRNPD PE=1 SV=1	1369.2	1854.9	2068.7	2008.4	1986.6	1877.5	1612.1	2038.6	1932.1	0.83	0.79	1.06
F8VZQ9	SAP domain-containing ribonucleoprotein OS=Homo sapiens GN=SARNP PE=1 SV=1	235.3	194.2	197.1	167.1	287.4	228.5	214.8	182.1	258	0.83	1.18	0.71
Q15029	116 kDa U5 small nuclear ribonucleoprotein component OS=Homo sapiens GN=EFTUD2 PE=1 SV=1	4360.6	3523.9	3338.8	2808.4	5743.4	3783.4	3942.3	3073.6	4763.4	0.83	1.28	0.65
E9PRY8	Elongation factor 1-delta OS=Homo sapiens GN=EEF1D PE=1 SV=1	179.9	170.7	193.8	172.2	203.8	218.8	175.3	183	211.3	0.83	0.96	0.87
P41091	Eukaryotic translation initiation factor 2 subunit 3 OS=Homo sapiens GN=EIF2S3 PE=1 SV=3	1600.8	1766.8	2074	2078.8	2193.2	1878	1683.8	2076.4	2035.6	0.83	0.81	1.02
Q8TEQ6	Gem-associated protein 5 OS=Homo sapiens GN=GEMIN5 PE=1 SV=3	2365.5	2445.1	2406.1	2205.8	2944.9	2860.8	2405.3	2306	2902.9	0.83	1.04	0.79
F8W8D3	Histone RNA hairpin-binding protein OS=Homo sapiens GN=SLBP PE=1 SV=1	79.6	60	61.8	70.3	86.9	81.1	69.8	66.1	84	0.83	1.06	0.79
O75569	Interferon-inducible double-stranded RNA-dependent protein kinase activator A OS=Homo sapiens GN=PRKRA PE=1 SV=1	458.9	447.4	496.9	463	591.2	498.8	453.2	480	545	0.83	0.94	0.88
O14979-2	Isoform 2 of Heterogeneous nuclear ribonucleoprotein D-like OS=Homo sapiens GN=HNRNPDL	1180.2	1453	1704.6	1576.6	1611.9	1566.4	1316.6	1640.6	1589.2	0.83	0.8	1.03
P61978-2	Isoform 2 of Heterogeneous nuclear ribonucleoprotein K OS=Homo sapiens GN=HNRNPK	2895.2	3384.1	3117.6	2930	4258.8	3328.3	3139.7	3023.8	3793.6	0.83	1.04	0.8
Q14157-5	Isoform 5 of Ubiquitin-associated protein 2-like OS=Homo sapiens GN=UBAP2L	1984.6	1765.8	2086.9	2149.1	2453.6	2082.3	1875.2	2118	2268	0.83	0.89	0.93
Q6PKG0	La-related protein 1 OS=Homo sapiens GN=LARP1 PE=1 SV=2	12117.3	10728.2	11533.2	11264.4	14546.7	12952.4	11422.8	11398.8	13749.6	0.83	1	0.83
Q9NPI6	mRNA-decapping enzyme 1A OS=Homo sapiens GN=DCP1A PE=1 SV=2	301	367.1	268.2	240.7	401	403.9	334.1	254.5	402.5	0.83	1.31	0.63
P84103	Serine/arginine-rich splicing factor 3 OS=Homo sapiens GN=SRSF3 PE=1 SV=1	1031.9	1238	962.9	803.6	1444.5	1294.8	1135	883.3	1369.7	0.83	1.28	0.64
E7EQZ4	Survival motor neuron protein OS=Homo sapiens GN=SMN1 PE=1 SV=1	614.7	534.3	559.2	543	728.1	663.3	574.5	551.1	695.7	0.83	1.04	0.79
B3KS98	Eukaryotic translation initiation factor 3 subunit H OS=Homo sapiens GN=EIF3H PE=1 SV=1	1266.5	1245	1452.8	1467.9	1751.3	1296.5	1255.8	1460.4	1523.9	0.82	0.86	0.96
Q9BQ67	Glutamate-rich WD repeat-containing protein 1 OS=Homo sapiens GN=GRWD1 PE=1 SV=1	283.6	271.9	296.3	272.4	352.4	322.5	277.8	284.4	337.5	0.82	0.98	0.84
Q9H361	Polyadenylate-binding protein 3 OS=Homo sapiens GN=PABPC3 PE=1 SV=2	578.1	482	624.2	613.8	729.3	557.8	530.1	619	643.6	0.82	0.86	0.96
P14618	Pyruvate kinase PKM OS=Homo sapiens GN=PKM PE=1 SV=4	2576.7	1585.4	1463.6	1199.3	3261.3	1785	2081.1	1331.5	2523.2	0.82	1.56	0.53
Q13769	THO complex subunit 5 homolog OS=Homo sapiens GN=THOC5 PE=1 SV=2	146.9	135.4	118.9	104.6	187.9	154.3	141.2	111.8	171.1	0.82	1.26	0.65
P49770	Translation initiation factor eIF-2B subunit beta OS=Homo sapiens GN=EIF2B2 PE=1 SV=3	224.8	230.6	275.3	292.3	258.5	294.7	227.7	283.8	276.6	0.82	0.8	1.03
P06733	Alpha-enolase OS=Homo sapiens GN=ENO1 PE=1 SV=2	4317.2	2636	2499.8	2178.2	5260.9	3246.5	3476.6	2339	4253.7	0.82	1.49	0.55
P05023	Sodium/potassium-transporting ATPase subunit alpha-1 OS=Homo sapiens GN=ATP1A1 PE=1 SV=1	1023.7	999.4	1204.9	903.6	1375.2	1096.5	1011.6	1054.3	1235.9	0.82	0.96	0.85
Q9Y3I0	tRNA-splicing ligase RtcB homolog OS=Homo sapiens GN=RTCB PE=1 SV=1	3869.7	4002.5	5084.3	4174	4930.7	4668.8	3936.1	4629.2	4799.8	0.82	0.85	0.96
Q8N6T3-2	Isoform 2 of ADP-ribosylation factor GTPase-activating protein 1 OS=Homo sapiens GN=ARFGAP1	202.2	165.4	199.3	156.2	243.6	209.5	183.8	177.8	226.6	0.81	1.03	0.78
Q9Y3Y2-3	Isoform 2 of Chromatin target of PRMT1 protein OS=Homo sapiens GN=CHTOP	800.9	854.2	821	708.1	1075	957.3	827.6	764.6	1016.2	0.81	1.08	0.75
O94906	Pre-mRNA-processing factor 6 OS=Homo sapiens GN=PRPF6 PE=1 SV=1	1265.6	1210.6	1114.7	993.6	1612.3	1441.7	1238.1	1054.2	1527	0.81	1.17	0.69
Q9HCE1	Putative helicase MOV-10 OS=Homo sapiens GN=MOV10 PE=1 SV=2	2408.6	2290.6	2399.6	2274.7	3027.1	2742.8	2349.6	2337.2	2885	0.81	1.01	0.81
Q13247	Serine/arginine-rich splicing factor 6 OS=Homo sapiens GN=SRSF6 PE=1 SV=2	354.9	295.4	305.5	275.9	473.1	326.6	325.2	290.7	399.9	0.81	1.12	0.73
Q92499	ATP-dependent RNA helicase DDX1 OS=Homo sapiens GN=DDX1 PE=1 SV=2	3714.9	3849.3	4193.5	4047.6	4758.7	4630.3	3782.1	4120.6	4694.5	0.81	0.92	0.88
A0A0J9YX62	DnaJ homolog subfamily B member 6 OS=Homo sapiens GN=DNAJB6 PE=1 SV=1	75.9	59.6	79.8	61.2	87.7	80.4	67.8	70.5	84.1	0.81	0.96	0.84
G8JLB6	Heterogeneous nuclear ribonucleoprotein H OS=Homo sapiens GN=HNRNPH1 PE=1 SV=1	1013.1	1033	1044.4	946.5	1419.8	1119.8	1023.1	995.5	1269.8	0.81	1.03	0.78
O15173-2	Isoform 2 of Membrane-associated progesterone receptor component 2 OS=Homo sapiens GN=PGRMC2	190.3	206.8	220.6	168.8	259.2	232.1	198.6	194.7	245.7	0.81	1.02	0.79
Q9Y520-7	Isoform 7 of Protein PRRC2C OS=Homo sapiens GN=PRRC2C	6710.4	7803.3	6496	6353.4	9223.1	8764.1	7256.9	6424.7	8993.6	0.81	1.13	0.71
J3KTL2	Serine/arginine-rich-splicing factor 1 OS=Homo sapiens GN=SRSF1 PE=1 SV=1	1269.3	1269.5	1335.7	949.3	1738.3	1413.8	1269.4	1142.5	1576.1	0.81	1.11	0.72
Q5VZU9	Tripeptidyl-peptidase 2 OS=Homo sapiens GN=TPP2 PE=1 SV=1	5134.4	4578.4	4262.1	3452.7	6388.5	5614	4856.4	3857.4	6001.3	0.81	1.26	0.64
P08670	Vimentin OS=Homo sapiens GN=VIM PE=1 SV=4	4719.5	5116.2	4745.3	3940.9	7189.2	4979.5	4917.9	4343.1	6084.4	0.81	1.13	0.71
Q9H0D6	5'-3' exoribonuclease 2 OS=Homo sapiens GN=XRN2 PE=1 SV=1	1142.3	1131.2	1224.3	1092	1503.2	1331.4	1136.8	1158.2	1417.3	0.8	0.98	0.82
Q9Y3X0	Coiled-coil domain-containing protein 9 OS=Homo sapiens GN=CCDC9 PE=1 SV=1	379	350.3	392.9	380.6	544.4	365.8	364.7	386.8	455.1	0.8	0.94	0.85
P55265-4	Isoform 4 of Double-stranded RNA-specific adenosine deaminase OS=Homo sapiens GN=ADAR	1989.4	1720.9	1753.7	1344.7	2539.5	2097	1855.2	1549.2	2318.3	0.8	1.2	0.67
P06748	Nucleophosmin OS=Homo sapiens GN=NPM1 PE=1 SV=2	4324.8	4503.5	5225.7	4811.3	5634.4	5374.4	4414.2	5018.5	5504.4	0.8	0.88	0.91
Q9Y3C6	Peptidyl-prolyl cis-trans isomerase-like 1 OS=Homo sapiens GN=PPIL1 PE=1 SV=1	113.5	99.5	117.3	81.6	137.7	128.4	106.5	99.5	133.1	0.8	1.07	0.75
Q9Y5S9	RNA-binding protein 8A OS=Homo sapiens GN=RBM8A PE=1 SV=1	1394.9	1767.8	1638.5	1627.3	2167.5	1779.2	1581.4	1632.9	1973.4	0.8	0.97	0.83
P54709	Sodium/potassium-transporting ATPase subunit beta-3 OS=Homo sapiens GN=ATP1B3 PE=1 SV=1	163.4	144.8	191	118.9	193.4	190.2	154.1	155	191.8	0.8	0.99	0.81
Q13200	26S proteasome non-ATPase regulatory subunit 2 OS=Homo sapiens GN=PSMD2 PE=1 SV=3	216.3	139.4	155.4	130.4	242.9	203.1	177.9	142.9	223	0.8	1.24	0.64
Q9UHX1	Poly(U)-binding-splicing factor PUF60 OS=Homo sapiens GN=PUF60 PE=1 SV=1	136.3	120.4	110	85.7	182.3	139.7	128.4	97.9	161	0.8	1.31	0.61
Q9BZK3	Putative nascent polypeptide-associated complex subunit alpha-like protein OS=Homo sapiens GN=NACAP1 PE=5 SV=1	145.5	148.5	147.5	155.2	195.3	173.1	147	151.4	184.2	0.8	0.97	0.82
P35251	Replication factor C subunit 1 OS=Homo sapiens GN=RFC1 PE=1 SV=4	327.9	311.2	341.9	315.5	451.7	349	319.6	328.7	400.4	0.8	0.97	0.82
P38159	RNA-binding motif protein, X chromosome OS=Homo sapiens GN=RBMX PE=1 SV=3	1721.5	1996.1	1573.9	1534.3	2840.9	1819.6	1858.8	1554.1	2330.3	0.8	1.2	0.67
P20042	Eukaryotic translation initiation factor 2 subunit 2 OS=Homo sapiens GN=EIF2S2 PE=1 SV=2	2888	3104.6	4226.9	4415.7	4019.8	3521.8	2996.3	4321.3	3770.8	0.79	0.69	1.15
P62805	Histone H4 OS=Homo sapiens GN=HIST1H4A PE=1 SV=2	50.7	75.8	60.9	60.8	78.4	81.1	63.3	60.9	79.8	0.79	1.04	0.76
Q9BUQ8	Probable ATP-dependent RNA helicase DDX23 OS=Homo sapiens GN=DDX23 PE=1 SV=3	663.3	559.3	580.5	531.1	799.7	739.8	611.3	555.8	769.8	0.79	1.1	0.72
A9Z1X7	Serine/arginine repetitive matrix protein 1 OS=Homo sapiens GN=SRRM1 PE=1 SV=1	841.6	850.9	820	696.1	1126.1	1006.2	846.3	758.1	1066.2	0.79	1.12	0.71
P68104	Elongation factor 1-alpha 1 OS=Homo sapiens GN=EEF1A1 PE=1 SV=1	1106.8	1190.6	1185.7	1189.9	1647.7	1265.1	1148.7	1187.8	1456.4	0.79	0.97	0.82
Q6P2E9	Enhancer of mRNA-decapping protein 4 OS=Homo sapiens GN=EDC4 PE=1 SV=1	3938.9	4364.5	3152.4	2812.9	5373.3	5120.6	4151.7	2982.7	5247	0.79	1.39	0.57
O15226-2	Isoform 2 of NF-kappa-B-repressing factor OS=Homo sapiens GN=NKRF	483.1	429.1	436	404.5	687.7	467	456.1	420.3	577.4	0.79	1.09	0.73
Q9BWF3	RNA-binding protein 4 OS=Homo sapiens GN=RBM4 PE=1 SV=1	172.4	157.9	167.2	143.2	244.7	174.2	165.2	155.2	209.5	0.79	1.06	0.74
P37108	Signal recognition particle 14 kDa protein OS=Homo sapiens GN=SRP14 PE=1 SV=2	786.9	1004.2	968.4	958.9	1310.2	960.7	895.6	963.7	1135.5	0.79	0.93	0.85
P62158	Calmodulin OS=Homo sapiens GN=CALM1 PE=1 SV=2	634.6	693.7	675.7	511.4	887.9	802.5	664.2	593.6	845.2	0.79	1.12	0.7
Q96I24	Far upstream element-binding protein 3 OS=Homo sapiens GN=FUBP3 PE=1 SV=2	109.6	93.4	99.8	99.3	137.3	120.9	101.5	99.6	129.1	0.79	1.02	0.77
P05455	Lupus La protein OS=Homo sapiens GN=SSB PE=1 SV=2	2426.7	2495.9	2718.7	2664.8	3042.4	3235.2	2461.3	2691.8	3138.8	0.78	0.91	0.86
Q15758	Neutral amino acid transporter B(0) OS=Homo sapiens GN=SLC1A5 PE=1 SV=2	384.3	328.8	388.9	359.3	537.4	373.2	356.6	374.1	455.3	0.78	0.95	0.82
P62191	26S protease regulatory subunit 4 OS=Homo sapiens GN=PSMC1 PE=1 SV=1	163.2	131.1	249.8	121.3	203.2	175.5	147.2	185.6	189.4	0.78	0.79	0.98
Q9NX58	Cell growth-regulating nucleolar protein OS=Homo sapiens GN=LYAR PE=1 SV=2	154.4	139	139.7	116.7	220.8	156.3	146.7	128.2	188.6	0.78	1.14	0.68
P09497-2	Isoform Non-brain of Clathrin light chain B OS=Homo sapiens GN=CLTB	345.4	392.3	358.8	368.7	549.7	397.5	368.9	363.8	473.6	0.78	1.01	0.77
Q9BXP5	Serrate RNA effector molecule homolog OS=Homo sapiens GN=SRRT PE=1 SV=1	232.7	236.8	239.4	233	326.6	275.7	234.8	236.2	301.2	0.78	0.99	0.78
P62306	Small nuclear ribonucleoprotein F OS=Homo sapiens GN=SNRPF PE=1 SV=1	162.9	204.2	191.9	175.4	250.3	219.4	183.6	183.7	234.9	0.78	1	0.78
E9PB61	THO complex subunit 4 OS=Homo sapiens GN=ALYREF PE=1 SV=1	2040.7	1978.8	2070.8	1930.1	2839.5	2326.5	2009.8	2000.5	2583	0.78	1	0.77
P62987	Ubiquitin-60S ribosomal protein L40 OS=Homo sapiens GN=UBA52 PE=1 SV=2	42.2	42.3	63.5	60.2	42.1	66.2	42.3	61.9	54.2	0.78	0.68	1.14
Q9BRJ6	Uncharacterized protein C7orf50 OS=Homo sapiens GN=C7orf50 PE=1 SV=1	875.6	947.2	1068.1	1010.8	1224.4	1115	911.4	1039.5	1169.7	0.78	0.88	0.89
Q9BX40	Protein LSM14 homolog B OS=Homo sapiens GN=LSM14B PE=1 SV=1	220	189.3	209.9	212.5	289.9	238	204.7	211.2	264	0.78	0.97	0.8
Q8WWY3	U4/U6 small nuclear ribonucleoprotein Prp31 OS=Homo sapiens GN=PRPF31 PE=1 SV=2	61.5	59.2	55.6	46.8	94.5	61	60.4	51.2	77.8	0.78	1.18	0.66
P27797	Calreticulin OS=Homo sapiens GN=CALR PE=1 SV=1	277.5	198.4	223.3	172.7	300.8	313.7	238	198	307.3	0.77	1.2	0.64
Q3KQU3	MAP7 domain-containing protein 1 OS=Homo sapiens GN=MAP7D1 PE=1 SV=1	151.9	147.9	159.1	138.4	228.1	160.5	149.9	148.8	194.3	0.77	1.01	0.77
O43660	Pleiotropic regulator 1 OS=Homo sapiens GN=PLRG1 PE=1 SV=1	86.4	72.8	72.8	78.2	115.9	90.3	79.6	75.5	103.1	0.77	1.05	0.73
P62316	Small nuclear ribonucleoprotein Sm D2 OS=Homo sapiens GN=SNRPD2 PE=1 SV=1	577.7	503.5	519.9	487.2	759.3	639	540.6	503.6	699.2	0.77	1.07	0.72
P23246	Splicing factor, proline- and glutamine-rich OS=Homo sapiens GN=SFPQ PE=1 SV=2	281.4	241.7	242.6	199.3	363.4	313.3	261.6	221	338.4	0.77	1.18	0.65
B3KTL8	cDNA FLJ38476 fis, clone FEBRA2022504, highly similar to YTH domain protein 1 OS=Homo sapiens PE=2 SV=1	295.6	343.6	348.5	348.6	469.7	361.5	319.6	348.6	415.6	0.77	0.92	0.84
P07355-2	Isoform 2 of Annexin A2 OS=Homo sapiens GN=ANXA2	377.4	354.2	394.2	333	499.6	453.6	365.8	363.6	476.6	0.77	1.01	0.76
O14828	Secretory carrier-associated membrane protein 3 OS=Homo sapiens GN=SCAMP3 PE=1 SV=3	264	271	266.1	205.9	415.8	280.7	267.5	236	348.3	0.77	1.13	0.68
Q9BV38	WD repeat-containing protein 18 OS=Homo sapiens GN=WDR18 PE=1 SV=2	302.2	303.2	310.3	262	451.8	335.8	302.7	286.2	393.8	0.77	1.06	0.73
Q9BZJ0	Crooked neck-like protein 1 OS=Homo sapiens GN=CRNKL1 PE=1 SV=4	572.7	543.3	533.5	472.2	812	645.6	558	502.9	728.8	0.77	1.11	0.69
Q9H0U4	Ras-related protein Rab-1B OS=Homo sapiens GN=RAB1B PE=1 SV=1	436	437.4	417.6	326.2	752.5	394	436.7	371.9	573.3	0.76	1.17	0.65
P48643	T-complex protein 1 subunit epsilon OS=Homo sapiens GN=CCT5 PE=1 SV=1	618.3	718	604.5	523.4	1175.8	575.4	668.2	564	875.6	0.76	1.18	0.64
O43290	U4/U6.U5 tri-snRNP-associated protein 1 OS=Homo sapiens GN=SART1 PE=1 SV=1	499.7	503.6	527.8	469.2	684.2	632.5	501.7	498.5	658.4	0.76	1.01	0.76
P51114	Fragile X mental retardation syndrome-related protein 1 OS=Homo sapiens GN=FXR1 PE=1 SV=3	361.1	283.2	318.6	333.4	447.8	400	322.2	326	423.9	0.76	0.99	0.77
Q7Z417	Nuclear fragile X mental retardation-interacting protein 2 OS=Homo sapiens GN=NUFIP2 PE=1 SV=1	4079.8	3968.9	4382.7	4337.1	5907	4741.9	4024.4	4359.9	5324.5	0.76	0.92	0.82
Q9NR30	Nucleolar RNA helicase 2 OS=Homo sapiens GN=DDX21 PE=1 SV=5	3614.2	3368.6	3665	3314.3	5321.8	3860.3	3491.4	3489.7	4591.1	0.76	1	0.76
Q9BPZ3	Polyadenylate-binding protein-interacting protein 2 OS=Homo sapiens GN=PAIP2 PE=1 SV=1	93	89.8	127.6	116	127.6	113.3	91.4	121.8	120.5	0.76	0.75	1.01
Q96DH6	RNA-binding protein Musashi homolog 2 OS=Homo sapiens GN=MSI2 PE=1 SV=1	1537.5	1521.2	1789.3	1591.8	2066.5	1970.8	1529.4	1690.6	2018.7	0.76	0.9	0.84
Q9Y295	Developmentally-regulated GTP-binding protein 1 OS=Homo sapiens GN=DRG1 PE=1 SV=1	784.7	740.9	770.7	607.5	906.2	1117.5	762.8	689.1	1011.9	0.75	1.11	0.68
P47897	Glutamine--tRNA ligase OS=Homo sapiens GN=QARS PE=1 SV=1	6732.9	6555.4	5913.9	5319.9	9017.1	8648.4	6644.2	5616.9	8832.8	0.75	1.18	0.64
Q3MHD2-2	Isoform 2 of Protein LSM12 homolog OS=Homo sapiens GN=LSM12	134.4	171.3	157.7	141	256.1	150.3	152.9	149.4	203.2	0.75	1.02	0.73
O75400	Pre-mRNA-processing factor 40 homolog A OS=Homo sapiens GN=PRPF40A PE=1 SV=2	78.9	86.5	101.4	93.2	111.4	108.7	82.7	97.3	110.1	0.75	0.85	0.88
H7C2I1	Protein arginine N-methyltransferase 1 OS=Homo sapiens GN=PRMT1 PE=1 SV=1	443.1	408.4	450.8	345.9	621.7	511.9	425.8	398.4	566.8	0.75	1.07	0.7
A0A087WWS1	THO complex subunit 1 OS=Homo sapiens GN=THOC1 PE=1 SV=1	534.3	489.2	503.7	411.2	755.1	608.8	511.8	457.5	682	0.75	1.12	0.67
Q15649	Zinc finger HIT domain-containing protein 3 OS=Homo sapiens GN=ZNHIT3 PE=1 SV=2	116.7	114.8	143.3	130	188.8	119.6	115.8	136.7	154.2	0.75	0.85	0.89
J3KR35	Coiled-coil domain containing 12, isoform CRA_a OS=Homo sapiens GN=CCDC12 PE=1 SV=1	119.5	154.3	134.2	144.5	177.5	188.4	136.9	139.4	183	0.75	0.98	0.76
Q15024	Exosome complex component RRP42 OS=Homo sapiens GN=EXOSC7 PE=1 SV=3	452.2	460.9	517.2	456.5	622.5	602.1	456.6	486.9	612.3	0.75	0.94	0.8
U3KQK0	Histone H2B OS=Homo sapiens GN=HIST1H2BN PE=1 SV=1	100.1	103	103.8	94.5	141.5	130.1	101.6	99.2	135.8	0.75	1.02	0.73
P24534	Elongation factor 1-beta OS=Homo sapiens GN=EEF1B2 PE=1 SV=3	1251.3	1148.4	1473	1366.7	1638.3	1593.1	1199.9	1419.9	1615.7	0.74	0.85	0.88
P16403	Histone H1.2 OS=Homo sapiens GN=HIST1H1C PE=1 SV=2	476	361	315.3	249.5	654.6	470.9	418.5	282.4	562.8	0.74	1.48	0.5
P56192	Methionine--tRNA ligase, cytoplasmic OS=Homo sapiens GN=MARS PE=1 SV=2	6531	6777.7	5784.2	5616.6	9189.3	8705.5	6654.4	5700.4	8947.4	0.74	1.17	0.64
Q13283	Ras GTPase-activating protein-binding protein 1 OS=Homo sapiens GN=G3BP1 PE=1 SV=1	6921.2	7986.4	9619.4	9933.5	10193.9	9860.7	7453.8	9776.5	10027.3	0.74	0.76	0.97
P29558	RNA-binding motif, single-stranded-interacting protein 1 OS=Homo sapiens GN=RBMS1 PE=1 SV=3	497.8	465.4	547.3	614.4	746.1	554.2	481.6	580.9	650.2	0.74	0.83	0.89
P50991	T-complex protein 1 subunit delta OS=Homo sapiens GN=CCT4 PE=1 SV=4	1194.4	1018.2	971.3	911.1	1862.6	1119.5	1106.3	941.2	1491.1	0.74	1.18	0.63
O75175	CCR4-NOT transcription complex subunit 3 OS=Homo sapiens GN=CNOT3 PE=1 SV=1	594.5	588.5	510.3	442.1	837	763.1	591.5	476.2	800.1	0.74	1.24	0.6
P67809	Nuclease-sensitive element-binding protein 1 OS=Homo sapiens GN=YBX1 PE=1 SV=3	6401.1	6309.9	6998.9	7739.5	10017.9	7265.2	6355.5	7369.2	8641.6	0.74	0.86	0.85
Q8NC51	Plasminogen activator inhibitor 1 RNA-binding protein OS=Homo sapiens GN=SERBP1 PE=1 SV=2	18689.7	18964.1	21323.5	21763.8	28824.3	22191.9	18826.9	21543.7	25508.1	0.74	0.87	0.84
Q9Y230	RuvB-like 2 OS=Homo sapiens GN=RUVBL2 PE=1 SV=3	732.8	787.9	725.7	614.9	1231.3	826.4	760.4	670.3	1028.9	0.74	1.13	0.65
Q92879	CUGBP Elav-like family member 1 OS=Homo sapiens GN=CELF1 PE=1 SV=2	312.9	291.5	345.2	293.2	511.6	311.1	302.2	319.2	411.4	0.73	0.95	0.78
O95816	BAG family molecular chaperone regulator 2 OS=Homo sapiens GN=BAG2 PE=1 SV=1	172.5	193.5	201.8	170	302	198.8	183	185.9	250.4	0.73	0.98	0.74
Q96F86	Enhancer of mRNA-decapping protein 3 OS=Homo sapiens GN=EDC3 PE=1 SV=1	833.6	750.2	744	580.1	1138.9	1031.6	791.9	662.1	1085.3	0.73	1.2	0.61
A0A0U1RRH7	Histone H2A OS=Homo sapiens PE=3 SV=1	676.5	670.9	589.6	511	832.2	1009	673.7	550.3	920.6	0.73	1.22	0.6
P50990	T-complex protein 1 subunit theta OS=Homo sapiens GN=CCT8 PE=1 SV=4	3523.1	3055.4	2964.3	2611.4	5598.1	3397.4	3289.3	2787.9	4497.8	0.73	1.18	0.62
Q6PJT7	Zinc finger CCCH domain-containing protein 14 OS=Homo sapiens GN=ZC3H14 PE=1 SV=1	215.4	219.3	201.3	171.2	343.9	250.8	217.4	186.3	297.4	0.73	1.17	0.63
P11387	DNA topoisomerase 1 OS=Homo sapiens GN=TOP1 PE=1 SV=2	147.3	151.4	166.5	156.9	262.9	148.8	149.4	161.7	205.9	0.73	0.92	0.79
P41252	Isoleucine--tRNA ligase, cytoplasmic OS=Homo sapiens GN=IARS PE=1 SV=2	10590.3	10960.2	9641.6	8960.9	14880.8	14712.6	10775.3	9301.3	14796.7	0.73	1.16	0.63
P62995	Transformer-2 protein homolog beta OS=Homo sapiens GN=TRA2B PE=1 SV=1	389.2	408.2	472.4	399.4	598.8	501.5	398.7	435.9	550.2	0.72	0.91	0.79
Q13155	Aminoacyl tRNA synthase complex-interacting multifunctional protein 2 OS=Homo sapiens GN=AIMP2 PE=1 SV=2	2468.1	2146.4	2084.4	1920.7	3381.3	2989.2	2307.3	2002.6	3185.3	0.72	1.15	0.63
P61221	ATP-binding cassette sub-family E member 1 OS=Homo sapiens GN=ABCE1 PE=1 SV=1	935	971.2	862.1	686.9	1398	1251.3	953.1	774.5	1324.7	0.72	1.23	0.58
Q10567	AP-1 complex subunit beta-1 OS=Homo sapiens GN=AP1B1 PE=1 SV=2	180	168.5	174.3	157.6	306	181.1	174.3	166	243.6	0.72	1.05	0.68
Q9C0B0	RING finger protein unkempt homolog OS=Homo sapiens GN=UNK PE=1 SV=2	187.6	177	228.9	211.8	260	249	182.3	220.4	254.5	0.72	0.83	0.87
Q16563	Synaptophysin-like protein 1 OS=Homo sapiens GN=SYPL1 PE=1 SV=1	192.2	200.2	240	183.8	308.6	239.2	196.2	211.9	273.9	0.72	0.93	0.77
P54136	Arginine--tRNA ligase, cytoplasmic OS=Homo sapiens GN=RARS PE=1 SV=2	10431.3	9725.4	9613	8729.6	14630.4	13675.2	10078.4	9171.3	14152.8	0.71	1.1	0.65
Q6IBR2	FARSLA protein OS=Homo sapiens GN=FARSLA PE=2 SV=1	345.5	328.1	522.8	469.8	464.8	481.6	336.8	496.3	473.2	0.71	0.68	1.05
Q9NWZ8	Gem-associated protein 8 OS=Homo sapiens GN=GEMIN8 PE=1 SV=1	226.9	180	220.7	217.5	297.5	275.8	203.5	219.1	286.7	0.71	0.93	0.76
P08238	Heat shock protein HSP 90-beta OS=Homo sapiens GN=HSP90AB1 PE=1 SV=4	1024.3	817.7	944.9	742.4	1523.7	1066.1	921	843.7	1294.9	0.71	1.09	0.65
Q13148	TAR DNA-binding protein 43 OS=Homo sapiens GN=TARDBP PE=1 SV=1	354.5	379.9	368.2	318.8	628.2	406.6	367.2	343.5	517.4	0.71	1.07	0.66
P09012	U1 small nuclear ribonucleoprotein A OS=Homo sapiens GN=SNRPA PE=1 SV=3	265	218.5	270	226	419.9	257.6	241.8	248	338.8	0.71	0.97	0.73
P16520	Guanine nucleotide-binding protein G(I)/G(S)/G(T) subunit beta-3 OS=Homo sapiens GN=GNB3 PE=1 SV=1	171.5	178.8	208.9	165.2	307.2	190.9	175.2	187.1	249.1	0.7	0.94	0.75
E5RJR5	S-phase kinase-associated protein 1 OS=Homo sapiens GN=SKP1 PE=1 SV=1	190.4	183.2	192.4	196.7	318.9	213.5	186.8	194.6	266.2	0.7	0.96	0.73
P49368	T-complex protein 1 subunit gamma OS=Homo sapiens GN=CCT3 PE=1 SV=4	1139.1	914	1005.4	949.2	1791.5	1123	1026.6	977.3	1457.3	0.7	1.05	0.67
Q96QR8	Transcriptional activator protein Pur-beta OS=Homo sapiens GN=PURB PE=1 SV=3	362.6	336.1	342.9	355.9	556.4	441.8	349.4	349.4	499.1	0.7	1	0.7
P51148-2	Isoform 2 of Ras-related protein Rab-5C OS=Homo sapiens GN=RAB5C	67.5	56.3	69.2	46	96	81.4	61.9	57.6	88.7	0.7	1.07	0.65
P31689	DnaJ homolog subfamily A member 1 OS=Homo sapiens GN=DNAJA1 PE=1 SV=2	233	159.7	191.3	151.4	360	206.8	196.4	171.4	283.4	0.69	1.15	0.6
P14868	Aspartate--tRNA ligase, cytoplasmic OS=Homo sapiens GN=DARS PE=1 SV=2	5221.3	5135.1	4667.4	4393.8	7975.9	7109.8	5178.2	4530.6	7542.9	0.69	1.14	0.6
Q13838-2	Isoform 2 of Spliceosome RNA helicase DDX39B OS=Homo sapiens GN=DDX39B	1478.6	1581.8	1486.7	1221.7	2760.7	1675.5	1530.2	1354.2	2218.1	0.69	1.13	0.61
P17987	T-complex protein 1 subunit alpha OS=Homo sapiens GN=TCP1 PE=1 SV=1	1683.9	1492.2	1396.3	1276.5	3028.8	1593.5	1588.1	1336.4	2311.2	0.69	1.19	0.58
O95985	DNA topoisomerase 3-beta-1 OS=Homo sapiens GN=TOP3B PE=1 SV=1	19.7	22.4	25.3	22.4	34.2	28.1	21.1	23.9	31.2	0.68	0.88	0.77
O00139-4	Isoform 4 of Kinesin-like protein KIF2A OS=Homo sapiens GN=KIF2A	96.6	100.6	101.1	90.4	176.1	116.8	98.6	95.8	146.5	0.67	1.03	0.65
Q9P2J5	Leucine--tRNA ligase, cytoplasmic OS=Homo sapiens GN=LARS PE=1 SV=2	13031.7	12489.2	11419.5	11104.1	19787.4	18072.8	12760.5	11261.8	18930.1	0.67	1.13	0.59
P49006	MARCKS-related protein OS=Homo sapiens GN=MARCKSL1 PE=1 SV=2	95.1	71.8	84.3	72	154.5	93.5	83.5	78.2	124	0.67	1.07	0.63
Q08170	Serine/arginine-rich splicing factor 4 OS=Homo sapiens GN=SRSF4 PE=1 SV=2	737.1	650.4	722.8	593	1229	833.4	693.8	657.9	1031.2	0.67	1.05	0.64
P19338	Nucleolin OS=Homo sapiens GN=NCL PE=1 SV=3	3600.5	4200.2	5290.7	4492.9	6207	5469.4	3900.4	4891.8	5838.2	0.67	0.8	0.84
Q15836	Vesicle-associated membrane protein 3 OS=Homo sapiens GN=VAMP3 PE=1 SV=3	188.5	193.6	197.4	160.3	353.3	219.4	191.1	178.9	286.4	0.67	1.07	0.62
Q15046	Lysine--tRNA ligase OS=Homo sapiens GN=KARS PE=1 SV=3	4744.1	4666.5	4657	4240.6	7425.8	6701.6	4705.3	4448.8	7063.7	0.67	1.06	0.63
P52298	Nuclear cap-binding protein subunit 2 OS=Homo sapiens GN=NCBP2 PE=1 SV=1	98.8	104.1	119.9	128.6	203.5	101.6	101.5	124.3	152.6	0.67	0.82	0.81
Q12904	Aminoacyl tRNA synthase complex-interacting multifunctional protein 1 OS=Homo sapiens GN=AIMP1 PE=1 SV=2	4214	3963.9	3698.5	3638.1	6584.3	5744.7	4089	3668.3	6164.5	0.66	1.11	0.6
Q13263	Transcription intermediary factor 1-beta OS=Homo sapiens GN=TRIM28 PE=1 SV=5	3582.3	3657.5	3998.2	3190	6165.5	4753.5	3619.9	3594.1	5459.5	0.66	1.01	0.66
P07814	Bifunctional glutamate/proline--tRNA ligase OS=Homo sapiens GN=EPRS PE=1 SV=5	19073.2	17421.8	16728.5	16370.7	29684.6	25801.4	18247.5	16549.6	27743	0.66	1.1	0.6
Q9Y3F4-2	Isoform 2 of Serine-threonine kinase receptor-associated protein OS=Homo sapiens GN=STRAP	1103.9	1246.5	1271.9	1243.4	1933.2	1637.2	1175.2	1257.7	1785.2	0.66	0.93	0.7
P16989-2	Isoform 2 of Y-box-binding protein 3 OS=Homo sapiens GN=YBX3	427.2	374.3	495.7	525.8	702.2	512	400.8	510.8	607.1	0.66	0.78	0.84
Q9UQ35	Serine/arginine repetitive matrix protein 2 OS=Homo sapiens GN=SRRM2 PE=1 SV=2	1004.8	983.7	1014.2	862.8	1761.5	1245.5	994.3	938.5	1503.5	0.66	1.06	0.62
Q16576-2	Isoform 2 of Histone-binding protein RBBP7 OS=Homo sapiens GN=RBBP7	79.4	81.6	88.9	74	133.4	111.8	80.5	81.5	122.6	0.66	0.99	0.66
Q92900	Regulator of nonsense transcripts 1 OS=Homo sapiens GN=UPF1 PE=1 SV=2	5099.5	5043.2	4096.8	3508.6	8584.7	6924.6	5071.4	3802.7	7754.7	0.65	1.33	0.49
Q5JWF2	Guanine nucleotide-binding protein G(s) subunit alpha isoforms XLas OS=Homo sapiens GN=GNAS PE=1 SV=2	360.9	312.7	421.6	277.3	624	409.3	336.8	349.5	516.7	0.65	0.96	0.68
Q8IU60	m7GpppN-mRNA hydrolase OS=Homo sapiens GN=DCP2 PE=1 SV=2	245	239.5	182.9	164.5	403.1	342.6	242.3	173.7	372.9	0.65	1.39	0.47
Q5SY16	Polynucleotide 5'-hydroxyl-kinase NOL9 OS=Homo sapiens GN=NOL9 PE=1 SV=1	105.4	95.7	92.2	78.9	172.2	139	100.6	85.6	155.6	0.65	1.18	0.55
P60903	Protein S100-A10 OS=Homo sapiens GN=S100A10 PE=1 SV=2	206.2	213.7	269.7	202.3	382.5	277.7	210	236	330.1	0.64	0.89	0.71
Q9UHC7	E3 ubiquitin-protein ligase makorin-1 OS=Homo sapiens GN=MKRN1 PE=1 SV=3	91.3	112.2	131	143.1	179.4	142	101.8	137.1	160.7	0.63	0.74	0.85
O43324	Eukaryotic translation elongation factor 1 epsilon-1 OS=Homo sapiens GN=EEF1E1 PE=1 SV=1	1015.9	1084.4	1032.9	985.2	1760.5	1568.2	1050.2	1009.1	1664.4	0.63	1.04	0.61
E7ERS3	Zinc finger CCCH domain-containing protein 18 OS=Homo sapiens GN=ZC3H18 PE=1 SV=1	49.4	53.2	40.1	39.3	109.5	53	51.3	39.7	81.3	0.63	1.29	0.49
P35613	Basigin OS=Homo sapiens GN=BSG PE=1 SV=2	563.7	497.3	720.6	473.4	1096.6	599.1	530.5	597	847.9	0.63	0.89	0.7
Q9Y5A9	YTH domain-containing family protein 2 OS=Homo sapiens GN=YTHDF2 PE=1 SV=2	1099.6	1118.2	1326.7	1313.1	2108.6	1437.6	1108.9	1319.9	1773.1	0.63	0.84	0.74
Q92843-2	Isoform 3 of Bcl-2-like protein 2 OS=Homo sapiens GN=BCL2L2	613.6	609.3	752.6	687	1121	852	611.5	719.8	986.5	0.62	0.85	0.73
Q14444	Caprin-1 OS=Homo sapiens GN=CAPRIN1 PE=1 SV=2	7271.4	7618	10728.8	11188.6	12758.7	11383.1	7444.7	10958.7	12070.9	0.62	0.68	0.91
Q15428	Splicing factor 3A subunit 2 OS=Homo sapiens GN=SF3A2 PE=1 SV=2	55.7	61.5	48.6	51.9	119.2	71.2	58.6	50.3	95.2	0.62	1.17	0.53
Q16629	Serine/arginine-rich splicing factor 7 OS=Homo sapiens GN=SRSF7 PE=1 SV=1	204.6	199.6	196.3	176.7	387.7	284.2	202.1	186.5	336	0.6	1.08	0.56
P62314	Small nuclear ribonucleoprotein Sm D1 OS=Homo sapiens GN=SNRPD1 PE=1 SV=1	100	83.9	94.3	94.2	179.2	132.9	92	94.3	156.1	0.59	0.98	0.6
Q7RTV0	PHD finger-like domain-containing protein 5A OS=Homo sapiens GN=PHF5A PE=1 SV=1	69.6	60.6	51.3	46.5	131.2	94.8	65.1	48.9	113	0.58	1.33	0.43
Q969S3	Zinc finger protein 622 OS=Homo sapiens GN=ZNF622 PE=1 SV=1	129.9	129.1	155.6	118.3	248.3	204.2	129.5	137	226.3	0.57	0.95	0.61
P20618	Proteasome subunit beta type-1 OS=Homo sapiens GN=PSMB1 PE=1 SV=2	118.5	78	89.4	56.6	244.4	105	98.3	73	174.7	0.56	1.35	0.42
P07237	Protein disulfide-isomerase OS=Homo sapiens GN=P4HB PE=1 SV=3	235.1	200.1	232.3	189.2	480.3	316.4	217.6	210.8	398.4	0.55	1.03	0.53
Q5RKV6	Exosome complex component MTR3 OS=Homo sapiens GN=EXOSC6 PE=1 SV=1	33.8	46.9	70	62.9	86	62.5	40.4	66.5	74.3	0.54	0.61	0.89
Q13242	Serine/arginine-rich splicing factor 9 OS=Homo sapiens GN=SRSF9 PE=1 SV=1	50.4	61.8	73.3	56.8	124.8	86.7	56.1	65.1	105.8	0.53	0.86	0.62
P62318	Small nuclear ribonucleoprotein Sm D3 OS=Homo sapiens GN=SNRPD3 PE=1 SV=1	166.5	225	205.1	200.8	493.7	266.2	195.8	203	380	0.52	0.96	0.53
P56537	Eukaryotic translation initiation factor 6 OS=Homo sapiens GN=EIF6 PE=1 SV=1	705.6	672.2	887.1	774.5	1609.2	1431.7	688.9	830.8	1520.5	0.45	0.83	0.55
O75822	Eukaryotic translation initiation factor 3 subunit J OS=Homo sapiens GN=EIF3J PE=1 SV=2	361.3	308.1	371.4	285.3	911.3	569.9	334.7	328.4	740.6	0.45	1.02	0.44
Q9NU22	Midasin OS=Homo sapiens GN=MDN1 PE=1 SV=2	47.9	65.3	66.9	52.5	152.8	101.2	56.6	59.7	127	0.45	0.95	0.47
P53985	Monocarboxylate transporter 1 OS=Homo sapiens GN=SLC16A1 PE=1 SV=3	109.7	66.8	129.7	79.9	282.7	118.9	88.3	104.8	200.8	0.44	0.84	0.52
P18583-9	Isoform I of Protein SON OS=Homo sapiens GN=SON	31.8	41.8	42.4	33.5	117.7	63	36.8	38	90.4	0.41	0.97	0.42
P12532-2	Isoform 2 of Creatine kinase U-type, mitochondrial OS=Homo sapiens GN=CKMT1A	158	204.4	231	172.8	519.4	428.3	181.2	201.9	473.9	0.38	0.9	0.43
O75534-4	Isoform 4 of Cold shock domain-containing protein E1 OS=Homo sapiens GN=CSDE1	3.5	10.1	16.5	14.1	33.8	16.4	6.8	15.3	25.1	0.27	0.44	0.61

## Sheet: ∆ZNF598 cells
The table shows tandem mass tag (TMT) mass spectrometry data obtained from polysome analysis in ∆ZNF598 cells. The quantitative value for each protein in each sample is indicated in the first set of columns. The next set of columns contains the average quantitative value of the two replicates. The last column contains the Low emetine/High emetine ratio.
Low eme = treatment with 1.8 µM emetine for 15 min
High eme = treatment with 360 µM emetine for 15 min
The data data are sorted in descending order by the "Low/High" column
Accession	Description	Low Eme 1	Low Eme 2	High Eme 1	High Eme 2	Low Avg	High Avg	Low/High
O60869	Endothelial differentiation-related factor 1 OS=Homo sapiens GN=EDF1 PE=1 SV=1	6451	5510.3	2046.9	2045.6	5980.7	2046.2	2.92283
P62913-2	Isoform 2 of 60S ribosomal protein L11 OS=Homo sapiens GN=RPL11	123.1	141.3	98.1	50.6	132.2	74.3	1.77927
P10412	Histone H1.4 OS=Homo sapiens GN=HIST1H1E PE=1 SV=2	5426.5	4121.2	2635.1	2751.7	4773.9	2693.4	1.77244
A0A024R4E5	High density lipoprotein binding protein (Vigilin), isoform CRA_a OS=Homo sapiens GN=HDLBP PE=1 SV=1	239.1	193.4	114.5	140.5	216.2	127.5	1.69569
P16403	Histone H1.2 OS=Homo sapiens GN=HIST1H1C PE=1 SV=2	606.7	463.6	331.1	331.1	535.2	331.1	1.61643
Q6Y7W6	PERQ amino acid-rich with GYF domain-containing protein 2 OS=Homo sapiens GN=GIGYF2 PE=1 SV=1	2336.8	2298.5	1461.2	1410.7	2317.7	1435.9	1.61411
E7EQ64	Trypsin-1 OS=Homo sapiens GN=PRSS1 PE=1 SV=1	703.5	1405	729.1	631.7	1054.2	680.4	1.54938
P18583-9	Isoform I of Protein SON OS=Homo sapiens GN=SON	99.3	52.9	53.9	46.3	76.1	50.1	1.51896
Q2TAY7	WD40 repeat-containing protein SMU1 OS=Homo sapiens GN=SMU1 PE=1 SV=2	121.3	174	107.9	88.5	147.7	98.2	1.50407
P62306	Small nuclear ribonucleoprotein F OS=Homo sapiens GN=SNRPF PE=1 SV=1	260.1	221.2	183.2	142.9	240.6	163.1	1.47517
Q13769	THO complex subunit 5 homolog OS=Homo sapiens GN=THOC5 PE=1 SV=2	155.4	149.7	119.3	90.1	152.6	104.7	1.4575
Q12986	Transcriptional repressor NF-X1 OS=Homo sapiens GN=NFX1 PE=1 SV=2	141.2	223.6	129.2	124	182.4	126.6	1.44076
Q9UL40-2	Isoform 2 of Zinc finger protein 346 OS=Homo sapiens GN=ZNF346	118.4	201.2	129.2	92.9	159.8	111.1	1.43834
P61221	ATP-binding cassette sub-family E member 1 OS=Homo sapiens GN=ABCE1 PE=1 SV=1	816.2	732.1	534.9	551.9	774.2	543.4	1.42473
Q9NYF8	Bcl-2-associated transcription factor 1 OS=Homo sapiens GN=BCLAF1 PE=1 SV=2	1944	1710.2	1384.3	1210.1	1827.1	1297.2	1.4085
P09651	Heterogeneous nuclear ribonucleoprotein A1 OS=Homo sapiens GN=HNRNPA1 PE=1 SV=5	1999.1	1170.4	1133	1117.7	1584.8	1125.4	1.40821
P52434-4	Isoform 4 of DNA-directed RNA polymerases I, II, and III subunit RPABC3 OS=Homo sapiens GN=POLR2H	50	68.4	47.8	38.6	59.2	43.2	1.37037
F8VZG9	RNA-binding protein fox-1 homolog 1 OS=Homo sapiens GN=RBFOX1 PE=4 SV=1	100.7	150.8	108.8	75.8	125.7	92.3	1.36186
P62273	40S ribosomal protein S29 OS=Homo sapiens GN=RPS29 PE=1 SV=2	1226.5	1407.7	1061.1	909.3	1317.1	985.2	1.33689
P84090	Enhancer of rudimentary homolog OS=Homo sapiens GN=ERH PE=1 SV=1	1664.3	1407.1	1193.9	1116.5	1535.7	1155.2	1.32938
Q7RTV0	PHD finger-like domain-containing protein 5A OS=Homo sapiens GN=PHF5A PE=1 SV=1	118.5	73	74	70.1	95.7	72.1	1.32732
A0A0A0MRR7	U1 small nuclear ribonucleoprotein C OS=Homo sapiens GN=SNRPC PE=1 SV=1	335.2	385.1	279.4	272.8	360.2	276.1	1.3046
Q15427	Splicing factor 3B subunit 4 OS=Homo sapiens GN=SF3B4 PE=1 SV=1	80.1	74.4	60.2	58.6	77.2	59.4	1.29966
Q13838-2	Isoform 2 of Spliceosome RNA helicase DDX39B OS=Homo sapiens GN=DDX39B	3558	2626.3	2468.2	2292.2	3092.2	2380.2	1.29913
Q9Y295	Developmentally-regulated GTP-binding protein 1 OS=Homo sapiens GN=DRG1 PE=1 SV=1	843.7	870.2	618.8	705.7	856.9	662.2	1.29402
Q13427	Peptidyl-prolyl cis-trans isomerase G OS=Homo sapiens GN=PPIG PE=1 SV=2	254.3	222.2	198.9	170.4	238.2	184.6	1.29036
Q15154	Pericentriolar material 1 protein OS=Homo sapiens GN=PCM1 PE=1 SV=4	1594.3	1705	1289.1	1272.9	1649.6	1281	1.28774
Q5BKZ1	DBIRD complex subunit ZNF326 OS=Homo sapiens GN=ZNF326 PE=1 SV=2	218.2	208.2	167.6	164.3	213.2	165.9	1.28511
Q53RG0	Eukaryotic translation initiation factor 4E member 2, isoform CRA_c OS=Homo sapiens GN=tmp_locus_9 PE=2 SV=1	526.3	667.4	405.6	523.4	596.8	464.5	1.28482
Q9UII4	E3 ISG15--protein ligase HERC5 OS=Homo sapiens GN=HERC5 PE=1 SV=2	333.8	442.8	328.2	277.9	388.3	303	1.28152
P08621	U1 small nuclear ribonucleoprotein 70 kDa OS=Homo sapiens GN=SNRNP70 PE=1 SV=2	761.6	773.3	635.3	563.1	767.4	599.2	1.28071
Q15459	Splicing factor 3A subunit 1 OS=Homo sapiens GN=SF3A1 PE=1 SV=1	566	417	404.4	366.9	491.5	385.6	1.27464
P38159	RNA-binding motif protein, X chromosome OS=Homo sapiens GN=RBMX PE=1 SV=3	3195.5	2014.4	2113.4	1978.6	2604.9	2046	1.27317
J3KTA4	Probable ATP-dependent RNA helicase DDX5 OS=Homo sapiens GN=DDX5 PE=1 SV=1	1569.9	1076.6	1090.1	990.4	1323.3	1040.3	1.27204
Q15428	Splicing factor 3A subunit 2 OS=Homo sapiens GN=SF3A2 PE=1 SV=2	137.8	74.1	88.3	80	106	84.1	1.2604
Q9UKZ1	CCR4-NOT transcription complex subunit 11 OS=Homo sapiens GN=CNOT11 PE=1 SV=1	227.4	257.2	188.8	197.2	242.3	193	1.25544
P08670	Vimentin OS=Homo sapiens GN=VIM PE=1 SV=4	9509.1	7609.4	7034.1	6627.1	8559.3	6830.6	1.25308
Q96F86	Enhancer of mRNA-decapping protein 3 OS=Homo sapiens GN=EDC3 PE=1 SV=1	514.3	662	473	468.1	588.1	470.5	1.24995
Q9BY77	Polymerase delta-interacting protein 3 OS=Homo sapiens GN=POLDIP3 PE=1 SV=2	663.2	735.5	575.5	544.2	699.3	559.8	1.2492
A0A087X2G6	Nucleolar protein 16 OS=Homo sapiens GN=NOP16 PE=1 SV=1	288.4	353.1	254.2	259.5	320.7	256.8	1.24883
Q15393	Splicing factor 3B subunit 3 OS=Homo sapiens GN=SF3B3 PE=1 SV=4	102.1	149.5	104.4	97.1	125.8	100.8	1.24802
Q9H840	Gem-associated protein 7 OS=Homo sapiens GN=GEMIN7 PE=1 SV=1	66.1	87	68.2	54.7	76.5	61.4	1.24593
P14866	Heterogeneous nuclear ribonucleoprotein L OS=Homo sapiens GN=HNRNPL PE=1 SV=2	9624	6777.6	6612.6	6589.2	8200.8	6600.9	1.24238
P09496-2	Isoform Non-brain of Clathrin light chain A OS=Homo sapiens GN=CLTA	927.7	1217.9	845.1	886.1	1072.8	865.6	1.23937
O15173-2	Isoform 2 of Membrane-associated progesterone receptor component 2 OS=Homo sapiens GN=PGRMC2	265.1	249	231	183.8	257	207.4	1.23915
Q15287	RNA-binding protein with serine-rich domain 1 OS=Homo sapiens GN=RNPS1 PE=1 SV=1	421.3	418.2	359.7	318.4	419.7	339.1	1.23769
S4R3H4	Apoptotic chromatin condensation inducer in the nucleus OS=Homo sapiens GN=ACIN1 PE=1 SV=1	2120.7	1754.5	1603	1528.7	1937.6	1565.8	1.23745
Q8WWY3	U4/U6 small nuclear ribonucleoprotein Prp31 OS=Homo sapiens GN=PRPF31 PE=1 SV=2	76	65.8	58.8	55.8	70.9	57.3	1.23735
V9GZ56	U6 snRNA-associated Sm-like protein LSm4 (Fragment) OS=Homo sapiens GN=LSM4 PE=1 SV=1	189.5	220.7	165.3	166.4	205.1	165.9	1.23629
P51991	Heterogeneous nuclear ribonucleoprotein A3 OS=Homo sapiens GN=HNRNPA3 PE=1 SV=2	3172.8	2059.2	2053.8	2187.4	2616	2120.6	1.23361
P22626	Heterogeneous nuclear ribonucleoproteins A2/B1 OS=Homo sapiens GN=HNRNPA2B1 PE=1 SV=2	5236.7	3506	3315.7	3773.4	4371.4	3544.6	1.23326
Q9NPI6	mRNA-decapping enzyme 1A OS=Homo sapiens GN=DCP1A PE=1 SV=2	232.3	254.4	207.8	187.2	243.3	197.5	1.2319
Q9NZM5	Glioma tumor suppressor candidate region gene 2 protein OS=Homo sapiens GN=GLTSCR2 PE=1 SV=2	65.7	87.4	62.4	62	76.6	62.2	1.23151
A8MXP9	Matrin-3 OS=Homo sapiens GN=MATR3 PE=1 SV=1	7942.8	7123.8	6357.5	5898.6	7533.3	6128	1.22932
Q9Y2W1	Thyroid hormone receptor-associated protein 3 OS=Homo sapiens GN=THRAP3 PE=1 SV=2	1756	1354.6	1256.1	1278.1	1555.3	1267.1	1.22745
Q6P2E9	Enhancer of mRNA-decapping protein 4 OS=Homo sapiens GN=EDC4 PE=1 SV=1	2644.6	3098.1	2412.5	2274.2	2871.3	2343.4	1.22527
M0R2Z9	SURP and G-patch domain-containing protein 2 OS=Homo sapiens GN=SUGP2 PE=1 SV=1	344.1	359.7	287.3	287.3	351.9	287.3	1.22485
Q96CT7	Coiled-coil domain-containing protein 124 OS=Homo sapiens GN=CCDC124 PE=1 SV=1	1206.1	1385.8	1050.1	1067.9	1295.9	1059	1.2237
P62316	Small nuclear ribonucleoprotein Sm D2 OS=Homo sapiens GN=SNRPD2 PE=1 SV=1	650.2	570.1	495.2	502.5	610.2	498.9	1.22309
P23246	Splicing factor, proline- and glutamine-rich OS=Homo sapiens GN=SFPQ PE=1 SV=2	523.4	434	409.8	375	478.7	392.4	1.21993
O75175	CCR4-NOT transcription complex subunit 3 OS=Homo sapiens GN=CNOT3 PE=1 SV=1	448	495.5	416.4	357.2	471.7	386.8	1.21949
Q99453	Paired mesoderm homeobox protein 2B OS=Homo sapiens GN=PHOX2B PE=1 SV=2	89.4	90.9	79.4	69	90.2	74.2	1.21563
Q96ST3	Paired amphipathic helix protein Sin3a OS=Homo sapiens GN=SIN3A PE=1 SV=2	69.8	83.1	65.3	60.9	76.5	63.1	1.21236
Q92522	Histone H1x OS=Homo sapiens GN=H1FX PE=1 SV=1	807.1	726.9	650.7	616.6	767	633.6	1.21054
J3KR35	Coiled-coil domain containing 12, isoform CRA_a OS=Homo sapiens GN=CCDC12 PE=1 SV=1	195.4	191.7	148.2	172.1	193.6	160.1	1.20924
A0A0A0MR39	Myelin expression factor 2 OS=Homo sapiens GN=MYEF2 PE=1 SV=1	247.8	208.1	199.3	178.3	227.9	188.8	1.2071
P06576	ATP synthase subunit beta, mitochondrial OS=Homo sapiens GN=ATP5B PE=1 SV=3	65.7	140.8	90.6	80.6	103.3	85.6	1.20678
P62891	60S ribosomal protein L39 OS=Homo sapiens GN=RPL39 PE=1 SV=2	202.3	265.9	180.8	208.9	234.1	194.8	1.20175
O00148	ATP-dependent RNA helicase DDX39A OS=Homo sapiens GN=DDX39A PE=1 SV=2	583.4	515.2	453.5	461.2	549.3	457.4	1.20092
H3BLZ8	Probable ATP-dependent RNA helicase DDX17 OS=Homo sapiens GN=DDX17 PE=1 SV=1	498.6	302.5	308.3	359.9	400.5	334.1	1.19874
P07910-2	Isoform C1 of Heterogeneous nuclear ribonucleoproteins C1/C2 OS=Homo sapiens GN=HNRNPC	15789.2	11908.5	11804.3	11357	13848.9	11580.5	1.19588
Q9Y3U8	60S ribosomal protein L36 OS=Homo sapiens GN=RPL36 PE=1 SV=3	2508.2	3064	2422.9	2238.3	2786.1	2330.6	1.19544
O75152	Zinc finger CCCH domain-containing protein 11A OS=Homo sapiens GN=ZC3H11A PE=1 SV=3	1182.9	924.6	895.1	869.4	1053.7	882.3	1.19426
H0YAR2	Polyadenylate-binding protein 1 (Fragment) OS=Homo sapiens GN=PABPC1 PE=1 SV=1	37.2	59.9	42.4	39	48.5	40.7	1.19165
Q9UKM9	RNA-binding protein Raly OS=Homo sapiens GN=RALY PE=1 SV=1	2051.4	1786.2	1633	1590.7	1918.8	1611.9	1.1904
Q9NW64	Pre-mRNA-splicing factor RBM22 OS=Homo sapiens GN=RBM22 PE=1 SV=1	277.5	261.5	219.8	233.4	269.5	226.6	1.18932
P55265-4	Isoform 4 of Double-stranded RNA-specific adenosine deaminase OS=Homo sapiens GN=ADAR	2032.6	1840.1	1615.5	1642.1	1936.3	1628.8	1.18879
Q8WU90	Zinc finger CCCH domain-containing protein 15 OS=Homo sapiens GN=ZC3H15 PE=1 SV=1	390.7	393.9	315.6	344.5	392.3	330.1	1.18843
P09012	U1 small nuclear ribonucleoprotein A OS=Homo sapiens GN=SNRPA PE=1 SV=3	419.7	339.1	326.1	313.1	379.4	319.6	1.18711
E9PB61	THO complex subunit 4 OS=Homo sapiens GN=ALYREF PE=1 SV=1	3377.8	2486.4	2536.8	2408.8	2932.1	2472.8	1.18574
Q9BV38	WD repeat-containing protein 18 OS=Homo sapiens GN=WDR18 PE=1 SV=2	325	322.6	287.1	259.3	323.8	273.2	1.18521
Q9Y3B4	Splicing factor 3B subunit 6 OS=Homo sapiens GN=SF3B6 PE=1 SV=1	161.8	157	145.5	123.8	159.4	134.6	1.18425
O43172	U4/U6 small nuclear ribonucleoprotein Prp4 OS=Homo sapiens GN=PRPF4 PE=1 SV=2	269.1	308.7	261.1	226.9	288.9	244	1.18402
Q9Y3Y2-3	Isoform 2 of Chromatin target of PRMT1 protein OS=Homo sapiens GN=CHTOP	1272.1	960.5	942.9	944.5	1116.3	943.7	1.1829
Q9HCS7	Pre-mRNA-splicing factor SYF1 OS=Homo sapiens GN=XAB2 PE=1 SV=2	178.2	200.5	156.7	163.6	189.4	160.2	1.18227
Q9BUQ8	Probable ATP-dependent RNA helicase DDX23 OS=Homo sapiens GN=DDX23 PE=1 SV=3	677.3	597.1	541	538.1	637.2	539.5	1.18109
P41208	Centrin-2 OS=Homo sapiens GN=CETN2 PE=1 SV=1	97.6	133.6	93.5	102.3	115.6	97.9	1.1808
A9Z1X7	Serine/arginine repetitive matrix protein 1 OS=Homo sapiens GN=SRRM1 PE=1 SV=1	1061.1	975.3	908.3	817.4	1018.2	862.8	1.18011
Q92900	Regulator of nonsense transcripts 1 OS=Homo sapiens GN=UPF1 PE=1 SV=2	3712.2	4103.1	3080.9	3550	3907.6	3315.4	1.17862
O75643	U5 small nuclear ribonucleoprotein 200 kDa helicase OS=Homo sapiens GN=SNRNP200 PE=1 SV=2	4832.1	4492.8	4142.5	3779.3	4662.5	3960.9	1.17713
E5RJR5	S-phase kinase-associated protein 1 OS=Homo sapiens GN=SKP1 PE=1 SV=1	378.9	254.6	271.7	267.2	316.7	269.4	1.17558
Q9Y4W2	Ribosomal biogenesis protein LAS1L OS=Homo sapiens GN=LAS1L PE=1 SV=2	367.1	387.1	330.3	311.9	377.1	321.1	1.1744
O75934	Pre-mRNA-splicing factor SPF27 OS=Homo sapiens GN=BCAS2 PE=1 SV=1	488	488.2	397.7	434.6	488.1	416.2	1.17275
P61353	60S ribosomal protein L27 OS=Homo sapiens GN=RPL27 PE=1 SV=2	5519.4	6218.6	5219.9	4799	5869	5009.4	1.1716
Q16629	Serine/arginine-rich splicing factor 7 OS=Homo sapiens GN=SRSF7 PE=1 SV=1	370.1	275.7	283.9	269.8	322.9	276.9	1.16612
Q13823	Nucleolar GTP-binding protein 2 OS=Homo sapiens GN=GNL2 PE=1 SV=1	471.6	622.3	487.8	450.2	546.9	469	1.1661
Q92879	CUGBP Elav-like family member 1 OS=Homo sapiens GN=CELF1 PE=1 SV=2	369	343	317.6	293.2	356	305.4	1.16568
P62263	40S ribosomal protein S14 OS=Homo sapiens GN=RPS14 PE=1 SV=3	7919.8	10094.4	7954.4	7513.3	9007.1	7733.9	1.16463
O75531	Barrier-to-autointegration factor OS=Homo sapiens GN=BANF1 PE=1 SV=1	819.3	679	620.7	668.3	749.1	644.5	1.1623
P62191	26S protease regulatory subunit 4 OS=Homo sapiens GN=PSMC1 PE=1 SV=1	106.6	153	115.1	108.6	129.8	111.9	1.15996
O75533	Splicing factor 3B subunit 1 OS=Homo sapiens GN=SF3B1 PE=1 SV=3	984.1	987.1	856.6	843	985.6	849.8	1.1598
Q3KQU3	MAP7 domain-containing protein 1 OS=Homo sapiens GN=MAP7D1 PE=1 SV=1	206.3	154.6	170.2	142	180.5	156.1	1.15631
Q15029	116 kDa U5 small nuclear ribonucleoprotein component OS=Homo sapiens GN=EFTUD2 PE=1 SV=1	3834.7	3474.3	3233.2	3092.8	3654.5	3163	1.15539
P25786-2	Isoform Long of Proteasome subunit alpha type-1 OS=Homo sapiens GN=PSMA1	221.3	313.6	235.7	227.6	267.5	231.6	1.15501
Q5SW79	Centrosomal protein of 170 kDa OS=Homo sapiens GN=CEP170 PE=1 SV=1	220.3	273.3	210.7	216.7	246.8	213.7	1.15489
A0A0D9SGE8	PHD finger protein 6 OS=Homo sapiens GN=PHF6 PE=1 SV=1	22.6	37.1	28.4	23.3	29.9	25.9	1.15444
Q13573	SNW domain-containing protein 1 OS=Homo sapiens GN=SNW1 PE=1 SV=1	560.3	435.8	445	418	498	431.5	1.15411
G8JLB6	Heterogeneous nuclear ribonucleoprotein H OS=Homo sapiens GN=HNRNPH1 PE=1 SV=1	1368.5	1319.7	1176.8	1152.9	1344.1	1164.8	1.15393
P40937	Replication factor C subunit 5 OS=Homo sapiens GN=RFC5 PE=1 SV=1	225.4	213.7	195.7	185.2	219.6	190.5	1.15276
Q13242	Serine/arginine-rich splicing factor 9 OS=Homo sapiens GN=SRSF9 PE=1 SV=1	116.3	76.4	77.3	89.9	96.3	83.6	1.15191
P79522	Proline-rich protein 3 OS=Homo sapiens GN=PRR3 PE=1 SV=2	62.3	109.9	85.6	64.1	86.1	74.9	1.14953
Q9Y3C6	Peptidyl-prolyl cis-trans isomerase-like 1 OS=Homo sapiens GN=PPIL1 PE=1 SV=1	158.1	128.2	120.6	128.8	143.2	124.7	1.14836
P84103	Serine/arginine-rich splicing factor 3 OS=Homo sapiens GN=SRSF3 PE=1 SV=1	1349.9	1143	1060.8	1112.7	1246.5	1086.8	1.14695
Q8IZL8	Proline-, glutamic acid- and leucine-rich protein 1 OS=Homo sapiens GN=PELP1 PE=1 SV=2	911.6	988.5	831.6	825.7	950	828.7	1.14637
Q7Z6E9	E3 ubiquitin-protein ligase RBBP6 OS=Homo sapiens GN=RBBP6 PE=1 SV=1	94.5	102.6	90.5	81.4	98.5	86	1.14535
Q9UMS4	Pre-mRNA-processing factor 19 OS=Homo sapiens GN=PRPF19 PE=1 SV=1	3613.7	3048.3	2920.1	2896.9	3331	2908.5	1.14526
Q13435	Splicing factor 3B subunit 2 OS=Homo sapiens GN=SF3B2 PE=1 SV=2	1217.8	1059.4	950.1	1039.6	1138.6	994.8	1.14455
A0A0U1RRH7	Histone H2A OS=Homo sapiens PE=3 SV=1	934.8	794.7	742.2	769.9	864.8	756	1.14392
P42766	60S ribosomal protein L35 OS=Homo sapiens GN=RPL35 PE=1 SV=2	5099.4	5236.8	4611.2	4434.3	5168.1	4522.8	1.14268
A0A0D9SF53	ATP-dependent RNA helicase DDX3X OS=Homo sapiens GN=DDX3X PE=1 SV=1	66.8	97	78.2	65.3	81.9	71.7	1.14226
Q9H0A0	RNA cytidine acetyltransferase OS=Homo sapiens GN=NAT10 PE=1 SV=2	96.9	131.5	102.3	97.7	114.2	100	1.142
Q12874	Splicing factor 3A subunit 3 OS=Homo sapiens GN=SF3A3 PE=1 SV=1	144.8	130.7	124.4	117.2	137.8	120.8	1.14073
Q8NI27	THO complex subunit 2 OS=Homo sapiens GN=THOC2 PE=1 SV=2	1087.2	789.9	840.1	807	938.6	823.6	1.13963
Q9BU76	Multiple myeloma tumor-associated protein 2 OS=Homo sapiens GN=MMTAG2 PE=1 SV=1	219.7	196.5	180.1	185.8	208.1	183	1.13716
Q13523	Serine/threonine-protein kinase PRP4 homolog OS=Homo sapiens GN=PRPF4B PE=1 SV=3	121	128.3	117.6	101.7	124.6	109.6	1.13686
P84098	60S ribosomal protein L19 OS=Homo sapiens GN=RPL19 PE=1 SV=1	6437.8	6864.2	6034.2	5686.4	6651	5860.3	1.13492
Q9NU22	Midasin OS=Homo sapiens GN=MDN1 PE=1 SV=2	108	63.6	76.3	74.9	85.8	75.6	1.13492
P49756	RNA-binding protein 25 OS=Homo sapiens GN=RBM25 PE=1 SV=3	409.7	466.8	404.9	368.4	438.3	386.7	1.13344
A5YKK6	CCR4-NOT transcription complex subunit 1 OS=Homo sapiens GN=CNOT1 PE=1 SV=2	3105.7	3779.4	3093.2	2985.5	3442.6	3039.3	1.1327
X6RAL5	Histone deacetylase complex subunit SAP18 OS=Homo sapiens GN=SAP18 PE=1 SV=1	529.6	454.5	443.9	425.9	492	434.9	1.13129
P09661	U2 small nuclear ribonucleoprotein A' OS=Homo sapiens GN=SNRPA1 PE=1 SV=2	621.1	612.6	524.7	568.1	616.8	546.4	1.12884
P62424	60S ribosomal protein L7a OS=Homo sapiens GN=RPL7A PE=1 SV=2	18392	19171.2	16906.8	16397	18781.6	16651.9	1.1279
P62805	Histone H4 OS=Homo sapiens GN=HIST1H4A PE=1 SV=2	132.8	101.8	97.4	110.6	117.3	104	1.12788
F8VZQ9	SAP domain-containing ribonucleoprotein OS=Homo sapiens GN=SARNP PE=1 SV=1	204.2	204.4	171.2	191.4	204.3	181.3	1.12686
P14678-3	Isoform SM-B1 of Small nuclear ribonucleoprotein-associated proteins B and B' OS=Homo sapiens GN=SNRPB	270.2	263.7	215.3	259.4	267	237.3	1.12516
Q9H4L4	Sentrin-specific protease 3 OS=Homo sapiens GN=SENP3 PE=1 SV=2	129.8	138.5	126.5	112.2	134.2	119.3	1.1249
Q15717-2	Isoform 2 of ELAV-like protein 1 OS=Homo sapiens GN=ELAVL1	2955.9	2859.2	2633.1	2542	2907.5	2587.6	1.12363
Q96PK6	RNA-binding protein 14 OS=Homo sapiens GN=RBM14 PE=1 SV=2	455.4	389.5	374.9	377.9	422.4	376.4	1.12221
P52597	Heterogeneous nuclear ribonucleoprotein F OS=Homo sapiens GN=HNRNPF PE=1 SV=3	498	527.5	466.6	447.2	512.7	456.9	1.12213
Q13243	Serine/arginine-rich splicing factor 5 OS=Homo sapiens GN=SRSF5 PE=1 SV=1	157.6	144.2	124.4	144.6	150.9	134.5	1.12193
E7ERS3	Zinc finger CCCH domain-containing protein 18 OS=Homo sapiens GN=ZC3H18 PE=1 SV=1	100.9	54.8	76.3	62.7	77.9	69.5	1.12086
Q6P2Q9	Pre-mRNA-processing-splicing factor 8 OS=Homo sapiens GN=PRPF8 PE=1 SV=2	4107.8	3502.1	3414.2	3378.6	3804.9	3396.4	1.12027
Q13151	Heterogeneous nuclear ribonucleoprotein A0 OS=Homo sapiens GN=HNRNPA0 PE=1 SV=1	1831.7	1445.7	1485.3	1445.9	1638.7	1465.6	1.11811
Q9H307	Pinin OS=Homo sapiens GN=PNN PE=1 SV=4	1721.2	1448.7	1344.2	1498.1	1584.9	1421.2	1.11518
Q53GS9	U4/U6.U5 tri-snRNP-associated protein 2 OS=Homo sapiens GN=USP39 PE=1 SV=2	469.1	427.6	416.3	388.7	448.4	402.5	1.11404
P31942	Heterogeneous nuclear ribonucleoprotein H3 OS=Homo sapiens GN=HNRNPH3 PE=1 SV=2	67.1	72.6	65.5	60.1	69.8	62.8	1.11146
O94906	Pre-mRNA-processing factor 6 OS=Homo sapiens GN=PRPF6 PE=1 SV=1	1432	1196.2	1128.6	1236.5	1314.1	1182.5	1.11129
Q1KMD3	Heterogeneous nuclear ribonucleoprotein U-like protein 2 OS=Homo sapiens GN=HNRNPUL2 PE=1 SV=1	2802.5	2490	2387.6	2387.5	2646.2	2387.6	1.10831
B3KY60	cDNA FLJ16777 fis, clone BRHIP2029567, highly similar to Cell division cycle 5-like protein OS=Homo sapiens PE=2 SV=1	2385.2	2170.7	2033.6	2081.3	2278	2057.4	1.10722
P38935	DNA-binding protein SMUBP-2 OS=Homo sapiens GN=IGHMBP2 PE=1 SV=3	153.3	198.7	150.7	167.3	176	159	1.10692
P42285	Superkiller viralicidic activity 2-like 2 OS=Homo sapiens GN=SKIV2L2 PE=1 SV=3	1214	1393.1	1191.3	1165.6	1303.6	1178.5	1.10615
P62995	Transformer-2 protein homolog beta OS=Homo sapiens GN=TRA2B PE=1 SV=1	589.8	526.2	495.3	514	558	504.6	1.10583
P26640	Valine--tRNA ligase OS=Homo sapiens GN=VARS PE=1 SV=4	192.7	195.5	165.9	186.1	194.1	176	1.10284
E9PAV3	Nascent polypeptide-associated complex subunit alpha, muscle-specific form OS=Homo sapiens GN=NACA PE=1 SV=1	577.4	712	568	602.5	644.7	585.2	1.10167
P37108	Signal recognition particle 14 kDa protein OS=Homo sapiens GN=SRP14 PE=1 SV=2	1035.1	894	868.6	884.9	964.6	876.8	1.10014
Q08211	ATP-dependent RNA helicase A OS=Homo sapiens GN=DHX9 PE=1 SV=4	9470.4	7865.6	8022.1	7775.6	8668	7898.8	1.09738
Q5SY16	Polynucleotide 5'-hydroxyl-kinase NOL9 OS=Homo sapiens GN=NOL9 PE=1 SV=1	133.9	118.2	116.2	114.1	126	115.1	1.0947
Q92600	Cell differentiation protein RCD1 homolog OS=Homo sapiens GN=RQCD1 PE=1 SV=1	595.5	716.7	575.2	623.6	656.1	599.4	1.09459
F8W727	60S ribosomal protein L32 OS=Homo sapiens GN=RPL32 PE=1 SV=1	11512.7	10843.8	10684.7	9745.3	11178.3	10215	1.0943
O00567	Nucleolar protein 56 OS=Homo sapiens GN=NOP56 PE=1 SV=4	72.2	95.5	85.6	67.9	83.9	76.8	1.09245
E9PAU2	Ribonucleoprotein PTB-binding 1 OS=Homo sapiens GN=RAVER1 PE=1 SV=1	296.7	324.7	308	261	310.7	284.5	1.09209
Q6I9Y2	THO complex subunit 7 homolog OS=Homo sapiens GN=THOC7 PE=1 SV=3	346.5	256.5	283.5	268.7	301.5	276.1	1.092
P62244	40S ribosomal protein S15a OS=Homo sapiens GN=RPS15A PE=1 SV=2	6007.5	6655	5857.4	5738.4	6331.2	5797.9	1.09198
Q96KR1	Zinc finger RNA-binding protein OS=Homo sapiens GN=ZFR PE=1 SV=2	1532	1394.4	1347.4	1334.6	1463.2	1341	1.09113
J3KTL2	Serine/arginine-rich-splicing factor 1 OS=Homo sapiens GN=SRSF1 PE=1 SV=1	1237.3	1168.4	1116	1091	1202.8	1103.5	1.08999
Q08170	Serine/arginine-rich splicing factor 4 OS=Homo sapiens GN=SRSF4 PE=1 SV=2	878.5	838.7	750.3	826.4	858.6	788.3	1.08918
P52272	Heterogeneous nuclear ribonucleoprotein M OS=Homo sapiens GN=HNRNPM PE=1 SV=3	11814.9	10559.1	10310.5	10251	11187	10280.8	1.08814
P35250	Replication factor C subunit 2 OS=Homo sapiens GN=RFC2 PE=1 SV=3	531.9	707.5	587.7	553.3	619.7	570.5	1.08624
Q8IU60	m7GpppN-mRNA hydrolase OS=Homo sapiens GN=DCP2 PE=1 SV=2	152.1	192.9	156.6	161.2	172.5	158.9	1.08559
J3KQN4	60S ribosomal protein L36a OS=Homo sapiens GN=RPL36A PE=3 SV=1	3422	3501.3	3187.5	3199.1	3461.7	3193.3	1.08405
O43823	A-kinase anchor protein 8 OS=Homo sapiens GN=AKAP8 PE=1 SV=1	180.7	200	177.2	174.5	190.4	175.8	1.08305
P20645	Cation-dependent mannose-6-phosphate receptor OS=Homo sapiens GN=M6PR PE=1 SV=1	810	905.8	774.4	810.1	857.9	792.2	1.08293
Q13144	Translation initiation factor eIF-2B subunit epsilon OS=Homo sapiens GN=EIF2B5 PE=1 SV=3	1576.7	1599.5	1414.7	1522	1588.1	1468.3	1.08159
O75494	Serine/arginine-rich splicing factor 10 OS=Homo sapiens GN=SRSF10 PE=1 SV=1	422	347.5	357.4	354.9	384.8	356.2	1.08029
Q8TDN6	Ribosome biogenesis protein BRX1 homolog OS=Homo sapiens GN=BRIX1 PE=1 SV=2	133.8	152.5	136.5	128.8	143.2	132.6	1.07994
Q9UHX1	Poly(U)-binding-splicing factor PUF60 OS=Homo sapiens GN=PUF60 PE=1 SV=1	139.5	135.2	137.7	117.2	137.4	127.5	1.07765
Q06265-2	Isoform 2 of Exosome complex component RRP45 OS=Homo sapiens GN=EXOSC9	334.2	396.8	353	325.4	365.5	339.2	1.07754
Q8N163	Cell cycle and apoptosis regulator protein 2 OS=Homo sapiens GN=CCAR2 PE=1 SV=2	594	542.3	514.4	540.6	568.2	527.5	1.07716
P26373	60S ribosomal protein L13 OS=Homo sapiens GN=RPL13 PE=1 SV=4	6702.7	6720.4	6240	6226	6711.5	6233	1.07677
P18621-3	Isoform 3 of 60S ribosomal protein L17 OS=Homo sapiens GN=RPL17	20493.6	21248.2	20036.6	18737	20870.9	19386.9	1.07655
P22087	rRNA 2'-O-methyltransferase fibrillarin OS=Homo sapiens GN=FBL PE=1 SV=2	2609	2587.8	2417.4	2411.7	2598.4	2414.6	1.07612
P42166	Lamina-associated polypeptide 2, isoform alpha OS=Homo sapiens GN=TMPO PE=1 SV=2	126.3	133.9	126.1	115.7	130.1	120.9	1.0761
Q9UQ35	Serine/arginine repetitive matrix protein 2 OS=Homo sapiens GN=SRRM2 PE=1 SV=2	1388.3	1268.6	1285.6	1186.7	1328.4	1236.1	1.07467
Q9BZJ0	Crooked neck-like protein 1 OS=Homo sapiens GN=CRNKL1 PE=1 SV=4	760.8	641.9	672.9	632.6	701.4	652.7	1.07461
Q9GZS3	WD repeat-containing protein 61 OS=Homo sapiens GN=WDR61 PE=1 SV=1	61.1	84.6	69.4	66.4	72.9	67.9	1.07364
P61927	60S ribosomal protein L37 OS=Homo sapiens GN=RPL37 PE=1 SV=2	3081.5	2810.2	2826.9	2663.2	2945.9	2745.1	1.07315
A0A0A0MTC5	Double-stranded RNA-binding protein Staufen homolog 2 OS=Homo sapiens GN=STAU2 PE=1 SV=1	836.4	993.6	878.2	829.5	915	853.8	1.07168
P27797	Calreticulin OS=Homo sapiens GN=CALR PE=1 SV=1	116.6	172.4	138.7	131.4	144.5	135.1	1.06958
Q9NXF1	Testis-expressed sequence 10 protein OS=Homo sapiens GN=TEX10 PE=1 SV=2	1026	916.5	919.3	897.2	971.2	908.3	1.06925
Q9NUQ6-3	Isoform 3 of SPATS2-like protein OS=Homo sapiens GN=SPATS2L	242.1	296.2	266.1	237.9	269.2	252	1.06825
P46779	60S ribosomal protein L28 OS=Homo sapiens GN=RPL28 PE=1 SV=3	5848.4	6171.6	5416.2	5839.3	6010	5627.7	1.06793
Q9Y5Q9	General transcription factor 3C polypeptide 3 OS=Homo sapiens GN=GTF3C3 PE=1 SV=1	128.5	108.6	103.3	118.7	118.5	111	1.06757
Q13148	TAR DNA-binding protein 43 OS=Homo sapiens GN=TARDBP PE=1 SV=1	503.2	454.9	458.3	439.4	479.1	448.9	1.06728
P12277	Creatine kinase B-type OS=Homo sapiens GN=CKB PE=1 SV=1	347.4	523.9	377.5	440.5	435.7	409	1.06528
A0A087WWS1	THO complex subunit 1 OS=Homo sapiens GN=THOC1 PE=1 SV=1	692.6	527.6	531.6	614.8	610.1	573.2	1.06438
Q6PJT7	Zinc finger CCCH domain-containing protein 14 OS=Homo sapiens GN=ZC3H14 PE=1 SV=1	331.8	238.2	264.6	271.1	285	267.8	1.06423
Q13868	Exosome complex component RRP4 OS=Homo sapiens GN=EXOSC2 PE=1 SV=2	107.1	121.2	108.2	106.8	114.2	107.5	1.06233
Q8IY81	pre-rRNA processing protein FTSJ3 OS=Homo sapiens GN=FTSJ3 PE=1 SV=2	58	72.4	60.1	62.7	65.2	61.4	1.06189
P46776	60S ribosomal protein L27a OS=Homo sapiens GN=RPL27A PE=1 SV=2	3758.4	4170.4	3686.2	3786.8	3964.4	3736.5	1.06099
P47813	Eukaryotic translation initiation factor 1A, X-chromosomal OS=Homo sapiens GN=EIF1AX PE=1 SV=2	788.7	644.6	614.9	736.8	716.7	675.9	1.06036
P49458	Signal recognition particle 9 kDa protein OS=Homo sapiens GN=SRP9 PE=1 SV=2	796.8	913.8	777.5	840.5	855.3	809	1.05723
A0A0A0MRX1	ELAV-like protein OS=Homo sapiens GN=ELAVL2 PE=1 SV=1	454.7	481.9	463.7	422.9	468.3	443.3	1.0564
Q07666	KH domain-containing, RNA-binding, signal transduction-associated protein 1 OS=Homo sapiens GN=KHDRBS1 PE=1 SV=1	1088.8	867.9	860.5	993.2	978.4	926.8	1.05568
Q7L2E3-2	Isoform 2 of Putative ATP-dependent RNA helicase DHX30 OS=Homo sapiens GN=DHX30	2013.5	2469	2157.7	2089.1	2241.3	2123.4	1.05552
P09497-2	Isoform Non-brain of Clathrin light chain B OS=Homo sapiens GN=CLTB	501.3	390	401	443.4	445.6	422.2	1.05542
P05387	60S acidic ribosomal protein P2 OS=Homo sapiens GN=RPLP2 PE=1 SV=1	11591	12984	11692.3	11598	12287.5	11645.3	1.05515
A0A024RA52	Proteasome subunit alpha type OS=Homo sapiens GN=PSMA2 PE=1 SV=1	25.6	43.5	28.5	37.1	34.6	32.8	1.05488
P18124	60S ribosomal protein L7 OS=Homo sapiens GN=RPL7 PE=1 SV=1	20772.7	20044.1	19683.6	19011	20408.4	19347.1	1.05486
O00505	Importin subunit alpha-4 OS=Homo sapiens GN=KPNA3 PE=1 SV=2	36.7	52.8	45.8	38.9	44.7	42.4	1.05425
A0A087WXF8	Nucleolar protein of 40 kDa OS=Homo sapiens GN=ZCCHC17 PE=1 SV=1	98.9	95.6	84.5	99.8	97.2	92.2	1.05423
O43143	Pre-mRNA-splicing factor ATP-dependent RNA helicase DHX15 OS=Homo sapiens GN=DHX15 PE=1 SV=2	760.9	721.5	730.4	677.3	741.2	703.9	1.05299
Q9BXP5	Serrate RNA effector molecule homolog OS=Homo sapiens GN=SRRT PE=1 SV=1	348.8	250.8	278.1	292.1	299.8	285.1	1.05156
P61978-2	Isoform 2 of Heterogeneous nuclear ribonucleoprotein K OS=Homo sapiens GN=HNRNPK	4617.3	3560.7	3876.1	3904.1	4089	3890.1	1.05113
O75822	Eukaryotic translation initiation factor 3 subunit J OS=Homo sapiens GN=EIF3J PE=1 SV=2	414.6	364.9	347.3	394.9	389.8	371.1	1.05039
Q6P158	Putative ATP-dependent RNA helicase DHX57 OS=Homo sapiens GN=DHX57 PE=1 SV=2	1391.3	1552.5	1414.7	1392.3	1471.9	1403.5	1.04874
P46063	ATP-dependent DNA helicase Q1 OS=Homo sapiens GN=RECQL PE=1 SV=3	248.1	285	246.3	262.4	266.6	254.3	1.04837
P55010	Eukaryotic translation initiation factor 5 OS=Homo sapiens GN=EIF5 PE=1 SV=2	1984.7	1483.9	1542.3	1768.1	1734.3	1655.2	1.04779
A0A0B4J220	Chromosome 11 open reading frame 48, isoform CRA_c OS=Homo sapiens GN=C11orf98 PE=1 SV=1	782.5	799.2	742.3	767.5	790.8	754.9	1.04756
O60306	Intron-binding protein aquarius OS=Homo sapiens GN=AQR PE=1 SV=4	139.8	124.7	109.6	143.2	132.2	126.4	1.04589
Q9Y3X0	Coiled-coil domain-containing protein 9 OS=Homo sapiens GN=CCDC9 PE=1 SV=1	431	391.5	373.8	412.6	411.2	393.2	1.04578
Q13200	26S proteasome non-ATPase regulatory subunit 2 OS=Homo sapiens GN=PSMD2 PE=1 SV=3	111.1	186.7	138.8	146.3	148.9	142.6	1.04418
P61247	40S ribosomal protein S3a OS=Homo sapiens GN=RPS3A PE=1 SV=2	18307.3	18195.6	17794.6	17186	18251.5	17490.3	1.04352
P26641	Elongation factor 1-gamma OS=Homo sapiens GN=EEF1G PE=1 SV=3	2548.4	2312.2	2123.7	2535.5	2430.3	2329.6	1.04323
P62917	60S ribosomal protein L8 OS=Homo sapiens GN=RPL8 PE=1 SV=2	9740.8	9806.1	9504.7	9235.6	9773.5	9370.2	1.04304
P46778	60S ribosomal protein L21 OS=Homo sapiens GN=RPL21 PE=1 SV=2	8736.8	8643.6	8382.4	8293.2	8690.2	8337.8	1.04227
Q14232	Translation initiation factor eIF-2B subunit alpha OS=Homo sapiens GN=EIF2B1 PE=1 SV=1	628.7	495.8	499.2	582.2	562.3	540.7	1.03995
P46783	40S ribosomal protein S10 OS=Homo sapiens GN=RPS10 PE=1 SV=1	9275.3	9809.7	9338.6	9014.4	9542.5	9176.5	1.03988
P62241	40S ribosomal protein S8 OS=Homo sapiens GN=RPS8 PE=1 SV=2	20683.3	19713.6	19362.6	19513	20198.5	19437.9	1.03913
Q9UN86	Ras GTPase-activating protein-binding protein 2 OS=Homo sapiens GN=G3BP2 PE=1 SV=2	1111.3	1408.6	1196.8	1230.4	1259.9	1213.6	1.03815
P62750	60S ribosomal protein L23a OS=Homo sapiens GN=RPL23A PE=1 SV=1	18241.3	18921.3	18010.2	17801	18581.3	17905.4	1.03775
P78362-2	Isoform 2 of SRSF protein kinase 2 OS=Homo sapiens GN=SRPK2	480.8	428.7	415.6	461	454.7	438.3	1.03742
Q9UHI6	Probable ATP-dependent RNA helicase DDX20 OS=Homo sapiens GN=DDX20 PE=1 SV=2	1145.8	1261.8	1137.8	1185.6	1203.8	1161.7	1.03624
P20618	Proteasome subunit beta type-1 OS=Homo sapiens GN=PSMB1 PE=1 SV=2	53.4	79.1	57.4	70.7	66.3	64	1.03594
Q13247	Serine/arginine-rich splicing factor 6 OS=Homo sapiens GN=SRSF6 PE=1 SV=2	279.6	329.5	267	321.2	304.5	294.1	1.03536
P47914	60S ribosomal protein L29 OS=Homo sapiens GN=RPL29 PE=1 SV=2	1759.3	1776.1	1625.5	1791.1	1767.7	1708.3	1.03477
Q9BRT6	Protein LLP homolog OS=Homo sapiens GN=LLPH PE=1 SV=1	626.5	522.2	548	562.6	574.4	555.3	1.0344
Q96GQ7	Probable ATP-dependent RNA helicase DDX27 OS=Homo sapiens GN=DDX27 PE=1 SV=2	360.5	417.6	375.9	376.3	389	376.1	1.0343
P14618	Pyruvate kinase PKM OS=Homo sapiens GN=PKM PE=1 SV=4	1075.7	1580.3	1215.3	1355.9	1328	1285.6	1.03298
P38919	Eukaryotic initiation factor 4A-III OS=Homo sapiens GN=EIF4A3 PE=1 SV=4	5408.7	4715.9	4938.4	4865.9	5062.3	4902.2	1.03266
Q659C4	La-related protein 1B OS=Homo sapiens GN=LARP1B PE=1 SV=2	128	205.5	169.1	154.3	166.8	161.7	1.03154
P61313	60S ribosomal protein L15 OS=Homo sapiens GN=RPL15 PE=1 SV=2	7007.9	6813.3	6928.7	6472.4	6910.6	6700.6	1.03134
O43660	Pleiotropic regulator 1 OS=Homo sapiens GN=PLRG1 PE=1 SV=1	153.9	100.1	124.3	122.1	127	123.2	1.03084
O75940	Survival of motor neuron-related-splicing factor 30 OS=Homo sapiens GN=SMNDC1 PE=1 SV=1	112.1	144.9	122.5	126.9	128.5	124.7	1.03047
Q02878	60S ribosomal protein L6 OS=Homo sapiens GN=RPL6 PE=1 SV=3	13371.4	14157.3	13327.6	13459	13764.4	13393.4	1.0277
P13010	X-ray repair cross-complementing protein 5 OS=Homo sapiens GN=XRCC5 PE=1 SV=3	3780.7	3536.8	3510.4	3618.8	3658.7	3564.6	1.0264
Q13428-4	Isoform 4 of Treacle protein OS=Homo sapiens GN=TCOF1	2319.8	2169.9	2226.6	2154.2	2244.8	2190.4	1.02484
O43390	Heterogeneous nuclear ribonucleoprotein R OS=Homo sapiens GN=HNRNPR PE=1 SV=1	6220.4	5468.2	5641.5	5764.4	5844.3	5703	1.02478
P30153	Serine/threonine-protein phosphatase 2A 65 kDa regulatory subunit A alpha isoform OS=Homo sapiens GN=PPP2R1A PE=1 SV=4	78.1	132	107.3	97.9	105.1	102.6	1.02437
Q9Y3Z3	Deoxynucleoside triphosphate triphosphohydrolase SAMHD1 OS=Homo sapiens GN=SAMHD1 PE=1 SV=2	53	90.2	69.4	70.4	71.6	69.9	1.02432
P20290	Transcription factor BTF3 OS=Homo sapiens GN=BTF3 PE=1 SV=1	152.9	154.6	158.2	142.3	153.8	150.2	1.02397
Q9BUJ2	Heterogeneous nuclear ribonucleoprotein U-like protein 1 OS=Homo sapiens GN=HNRNPUL1 PE=1 SV=2	315.7	247.5	297.4	252.8	281.6	275.1	1.02363
P04406	Glyceraldehyde-3-phosphate dehydrogenase OS=Homo sapiens GN=GAPDH PE=1 SV=3	988.2	1427.5	1145.3	1217.2	1207.9	1181.3	1.02252
Q9BQ67	Glutamate-rich WD repeat-containing protein 1 OS=Homo sapiens GN=GRWD1 PE=1 SV=1	234.8	276.9	241.8	258.7	255.9	250.3	1.02237
E9PR30	40S ribosomal protein S30 OS=Homo sapiens GN=FAU PE=1 SV=1	4401.3	4709.4	4154.2	4758	4555.3	4456.1	1.02226
J3QQ67	60S ribosomal protein L18 (Fragment) OS=Homo sapiens GN=RPL18 PE=1 SV=1	8869.3	8971.4	8694.2	8770.7	8920.3	8732.5	1.02151
Q01780	Exosome component 10 OS=Homo sapiens GN=EXOSC10 PE=1 SV=2	204.5	256.9	203.5	248.3	230.7	225.9	1.02125
P36578	60S ribosomal protein L4 OS=Homo sapiens GN=RPL4 PE=1 SV=5	30839.7	31963.9	30339.6	31275	31401.8	30807.4	1.01929
Q9HAN9	Nicotinamide/nicotinic acid mononucleotide adenylyltransferase 1 OS=Homo sapiens GN=NMNAT1 PE=1 SV=1	514.1	555.8	521	529.2	535	525.1	1.01885
Q15773	Myeloid leukemia factor 2 OS=Homo sapiens GN=MLF2 PE=1 SV=1	99.7	152.1	133.5	113.7	125.9	123.6	1.01861
P63220	40S ribosomal protein S21 OS=Homo sapiens GN=RPS21 PE=1 SV=1	1563.4	1467	1427.7	1548.2	1515.2	1488	1.01828
O95793	Double-stranded RNA-binding protein Staufen homolog 1 OS=Homo sapiens GN=STAU1 PE=1 SV=2	9044.6	9307.8	9024.9	9005.6	9176.2	9015.2	1.01786
P60866	40S ribosomal protein S20 OS=Homo sapiens GN=RPS20 PE=1 SV=1	3609.2	3632	3580.9	3533.6	3620.6	3557.2	1.01782
Q15363	Transmembrane emp24 domain-containing protein 2 OS=Homo sapiens GN=TMED2 PE=1 SV=1	55.7	85.3	81.7	56.8	70.5	69.3	1.01732
Q00839	Heterogeneous nuclear ribonucleoprotein U OS=Homo sapiens GN=HNRNPU PE=1 SV=6	15696	12744.2	14264.9	13738	14220.1	14001.6	1.01561
D6RF23	Receptor of-activated protein C kinase 1 OS=Homo sapiens GN=RACK1 PE=1 SV=1	369.1	369.8	326.2	401.4	369.4	363.8	1.01539
U3KQK0	Histone H2B OS=Homo sapiens GN=HIST1H2BN PE=1 SV=1	150.5	122.7	127	142.1	136.6	134.6	1.01486
Q9UHC7	E3 ubiquitin-protein ligase makorin-1 OS=Homo sapiens GN=MKRN1 PE=1 SV=3	144.1	121.8	142.2	120	133	131.1	1.01449
A0A0C4DG89	Probable ATP-dependent RNA helicase DDX46 OS=Homo sapiens GN=DDX46 PE=1 SV=1	221.5	287.9	258.6	243.8	254.7	251.2	1.01393
P61254	60S ribosomal protein L26 OS=Homo sapiens GN=RPL26 PE=1 SV=1	4742.6	4583.7	4494.8	4713.2	4663.1	4604	1.01284
Q5VZU9	Tripeptidyl-peptidase 2 OS=Homo sapiens GN=TPP2 PE=1 SV=1	3377.4	3913.5	3253.2	3953.4	3645.4	3603.3	1.01168
P31689	DnaJ homolog subfamily A member 1 OS=Homo sapiens GN=DNAJA1 PE=1 SV=2	202.3	204.7	203.4	199.1	203.5	201.2	1.01143
Q5R363	SRSF protein kinase 1 OS=Homo sapiens GN=SRPK1 PE=1 SV=2	3489.2	3270.6	3384.7	3308.3	3379.9	3346.5	1.00998
P62851	40S ribosomal protein S25 OS=Homo sapiens GN=RPS25 PE=1 SV=1	5246.9	5018.2	5024.1	5148.2	5132.5	5086.1	1.00912
P62906	60S ribosomal protein L10a OS=Homo sapiens GN=RPL10A PE=1 SV=2	12662.5	12849.6	12747.6	12543	12756	12645.1	1.00877
Q9NR30	Nucleolar RNA helicase 2 OS=Homo sapiens GN=DDX21 PE=1 SV=5	3534.6	3359.7	3462.4	3377.2	3447.2	3419.8	1.00801
Q9H0D6	5'-3' exoribonuclease 2 OS=Homo sapiens GN=XRN2 PE=1 SV=1	1558.5	1428.1	1459.7	1503.3	1493.3	1481.5	1.00796
P40429	60S ribosomal protein L13a OS=Homo sapiens GN=RPL13A PE=1 SV=2	11538.9	11400.7	11157.4	11633	11469.8	11395.3	1.00654
Q9Y3F4-2	Isoform 2 of Serine-threonine kinase receptor-associated protein OS=Homo sapiens GN=STRAP	1146.9	1163.3	1137.9	1158.8	1155.1	1148.3	1.00592
U3KQP1	Asparagine synthetase domain-containing protein 1 (Fragment) OS=Homo sapiens GN=ASNSD1 PE=1 SV=1	164	129.7	154.6	137.4	146.8	146	1.00548
Q9NX58	Cell growth-regulating nucleolar protein OS=Homo sapiens GN=LYAR PE=1 SV=2	172	142.3	152	160.9	157.2	156.4	1.00512
Q9BTD8	RNA-binding protein 42 OS=Homo sapiens GN=RBM42 PE=1 SV=1	876.6	747.3	784.2	832.9	811.9	808.5	1.00421
Q13155	Aminoacyl tRNA synthase complex-interacting multifunctional protein 2 OS=Homo sapiens GN=AIMP2 PE=1 SV=2	1673.7	1589.6	1630.9	1620.4	1631.7	1625.6	1.00375
A0A0C4DG17	40S ribosomal protein SA OS=Homo sapiens GN=RPSA PE=1 SV=1	15975.8	17199.3	16362.3	16691	16587.6	16526.7	1.00368
P35251	Replication factor C subunit 1 OS=Homo sapiens GN=RFC1 PE=1 SV=4	325.9	332.1	340.8	314.7	329	327.8	1.00366
P83731	60S ribosomal protein L24 OS=Homo sapiens GN=RPL24 PE=1 SV=1	13752.1	13340.5	13058.3	13942	13546.3	13500.1	1.00342
Q7L2J0	7SK snRNA methylphosphate capping enzyme OS=Homo sapiens GN=MEPCE PE=1 SV=1	231.1	248.3	226	251.7	239.7	238.9	1.00335
P61513	60S ribosomal protein L37a OS=Homo sapiens GN=RPL37A PE=1 SV=2	5134.2	5240.2	5084.1	5261.6	5187.2	5172.9	1.00276
Q9UN81	LINE-1 retrotransposable element ORF1 protein OS=Homo sapiens GN=L1RE1 PE=1 SV=1	108	126.6	109.3	124.6	117.3	117	1.00256
F8W930	Insulin-like growth factor 2 mRNA-binding protein 2 OS=Homo sapiens GN=IGF2BP2 PE=1 SV=1	971.9	1136.9	1038.7	1065.4	1054.4	1052.1	1.00219
P18077	60S ribosomal protein L35a OS=Homo sapiens GN=RPL35A PE=1 SV=2	14855.3	12547.5	13495.7	13865	13701.4	13680.5	1.00153
A0A087WX23	Retrotransposon-derived protein PEG10 OS=Homo sapiens GN=PEG10 PE=1 SV=1	251.3	275.5	246.7	279.5	263.4	263.1	1.00114
P27635	60S ribosomal protein L10 OS=Homo sapiens GN=RPL10 PE=1 SV=4	9477.8	9600.7	9353.3	9713	9539.2	9533.2	1.00063
O43290	U4/U6.U5 tri-snRNP-associated protein 1 OS=Homo sapiens GN=SART1 PE=1 SV=1	621.7	554.1	570.5	604.8	587.9	587.7	1.00034
P62314	Small nuclear ribonucleoprotein Sm D1 OS=Homo sapiens GN=SNRPD1 PE=1 SV=1	146.3	103.4	122.8	127.1	124.8	125	0.9984
Q8N3C0	Activating signal cointegrator 1 complex subunit 3 OS=Homo sapiens GN=ASCC3 PE=1 SV=3	299.1	277.9	287.2	291.6	288.5	289.4	0.99689
F8WB05	Ataxin-2 (Fragment) OS=Homo sapiens GN=ATXN2 PE=1 SV=2	22.7	26.7	24.9	24.6	24.7	24.8	0.995968
A0A0J9YX62	DnaJ homolog subfamily B member 6 OS=Homo sapiens GN=DNAJB6 PE=1 SV=1	61.4	72.9	65.1	69.8	67.1	67.4	0.995549
Q9UBI9	Headcase protein homolog OS=Homo sapiens GN=HECA PE=1 SV=1	52.3	57.2	61.3	49	54.8	55.1	0.994555
Q9BQG0-2	Isoform 2 of Myb-binding protein 1A OS=Homo sapiens GN=MYBBP1A	334.8	380.2	374.4	345.4	357.5	359.9	0.993331
O14893	Gem-associated protein 2 OS=Homo sapiens GN=GEMIN2 PE=1 SV=1	509.6	597.7	544.4	570.8	553.6	557.6	0.992826
P62277	40S ribosomal protein S13 OS=Homo sapiens GN=RPS13 PE=1 SV=2	9947.8	9408.4	9754.8	9744.4	9678.1	9749.6	0.992666
Q02543	60S ribosomal protein L18a OS=Homo sapiens GN=RPL18A PE=1 SV=2	7155	7116.4	7189	7205.6	7135.7	7197.3	0.991441
C9J6P4	Zinc finger CCCH-type antiviral protein 1 OS=Homo sapiens GN=ZC3HAV1 PE=1 SV=1	817.5	853.4	851.7	834.1	835.4	842.9	0.991102
O43395	U4/U6 small nuclear ribonucleoprotein Prp3 OS=Homo sapiens GN=PRPF3 PE=1 SV=2	152.3	165.1	139.6	180.8	158.7	160.2	0.990637
Q9Y4Y9	U6 snRNA-associated Sm-like protein LSm5 OS=Homo sapiens GN=LSM5 PE=1 SV=3	486.8	443.5	469.4	469.6	465.1	469.5	0.990628
Q13310-3	Isoform 3 of Polyadenylate-binding protein 4 OS=Homo sapiens GN=PABPC4	10122.3	9995.7	10359.8	9950.9	10059	10155.4	0.990508
Q9H9A5	CCR4-NOT transcription complex subunit 10 OS=Homo sapiens GN=CNOT10 PE=1 SV=1	568.6	579.8	545.4	614.3	574.2	579.9	0.990171
P62913	60S ribosomal protein L11 OS=Homo sapiens GN=RPL11 PE=1 SV=2	9658	9355.9	9631.9	9601.6	9507	9616.7	0.988593
Q13263	Transcription intermediary factor 1-beta OS=Homo sapiens GN=TRIM28 PE=1 SV=5	3736.3	4294.8	3870.7	4264.8	4015.6	4067.7	0.987192
P35268	60S ribosomal protein L22 OS=Homo sapiens GN=RPL22 PE=1 SV=2	4781.6	4974.9	4943.8	4940.4	4878.3	4942.1	0.987091
P42677	40S ribosomal protein S27 OS=Homo sapiens GN=RPS27 PE=1 SV=3	2816.4	2525	2856.1	2556.1	2670.7	2706.1	0.986918
J3QS41	Probable helicase with zinc finger domain OS=Homo sapiens GN=HELZ PE=1 SV=1	526.9	609.1	556.9	594.7	568	575.8	0.986454
Q9BWF3	RNA-binding protein 4 OS=Homo sapiens GN=RBM4 PE=1 SV=1	226.3	168.1	207.7	192.5	197.2	200.1	0.985507
O75179	Ankyrin repeat domain-containing protein 17 OS=Homo sapiens GN=ANKRD17 PE=1 SV=3	72.9	87.7	87	76	80.3	81.5	0.985276
Q9Y2X3	Nucleolar protein 58 OS=Homo sapiens GN=NOP58 PE=1 SV=1	93.5	121.7	110.6	107.9	107.6	109.3	0.984446
P63244	Receptor of activated protein C kinase 1 OS=Homo sapiens GN=RACK1 PE=1 SV=3	26036.8	25191	25660.3	26413	25613.9	26036.4	0.983773
P11387	DNA topoisomerase 1 OS=Homo sapiens GN=TOP1 PE=1 SV=2	177.6	141.8	161.9	163.2	159.7	162.5	0.982769
O75396	Vesicle-trafficking protein SEC22b OS=Homo sapiens GN=SEC22B PE=1 SV=4	74.2	116.7	95.1	99.3	95.5	97.2	0.98251
A0A087WVQ6	Clathrin heavy chain OS=Homo sapiens GN=CLTC PE=1 SV=1	9335.1	9334.4	9317.2	9700.5	9334.8	9508.9	0.981691
Q8IZH2	5'-3' exoribonuclease 1 OS=Homo sapiens GN=XRN1 PE=1 SV=1	253.4	304.1	279.6	289.4	278.8	284.5	0.979965
Q8TEQ6	Gem-associated protein 5 OS=Homo sapiens GN=GEMIN5 PE=1 SV=3	1795.7	1899.3	1807.3	1965.6	1847.5	1886.4	0.979379
Q9Y265	RuvB-like 1 OS=Homo sapiens GN=RUVBL1 PE=1 SV=1	1345.9	1556.5	1533	1431.8	1451.2	1482.4	0.978953
Q99729-3	Isoform 3 of Heterogeneous nuclear ribonucleoprotein A/B OS=Homo sapiens GN=HNRNPAB	8191.6	5526.7	6685.2	7333.6	6859.2	7009.4	0.978572
A0A0U1RQK7	Eukaryotic translation initiation factor 4 gamma 3 OS=Homo sapiens GN=EIF4G3 PE=1 SV=1	372.9	622.3	471.8	545.7	497.6	508.7	0.97818
P24534	Elongation factor 1-beta OS=Homo sapiens GN=EEF1B2 PE=1 SV=3	2062.1	1505.1	1619	2028.3	1783.6	1823.7	0.978012
O75400	Pre-mRNA-processing factor 40 homolog A OS=Homo sapiens GN=PRPF40A PE=1 SV=2	78	88	84.7	85.2	83	84.9	0.977621
P63104	14-3-3 protein zeta/delta OS=Homo sapiens GN=YWHAZ PE=1 SV=1	1991.9	2307.7	2158.2	2240.1	2149.8	2199.1	0.977582
Q7Z2T5	TRMT1-like protein OS=Homo sapiens GN=TRMT1L PE=1 SV=2	1384.5	1446.2	1450.6	1445.6	1415.3	1448.1	0.97735
P52292	Importin subunit alpha-1 OS=Homo sapiens GN=KPNA2 PE=1 SV=1	268.8	240	258.5	262.1	254.4	260.3	0.977334
P25398	40S ribosomal protein S12 OS=Homo sapiens GN=RPS12 PE=1 SV=3	13671	13403.4	13598.7	14140	13537.2	13869.3	0.976055
P08579	U2 small nuclear ribonucleoprotein B'' OS=Homo sapiens GN=SNRPB2 PE=1 SV=1	188.8	157.5	150.5	204.9	173.2	177.7	0.974676
Q14677-3	Isoform 3 of Clathrin interactor 1 OS=Homo sapiens GN=CLINT1	2674.7	2408.6	2574.1	2641.6	2541.6	2607.8	0.974615
P06733	Alpha-enolase OS=Homo sapiens GN=ENO1 PE=1 SV=2	1879.2	2785.3	2223.4	2564.6	2332.2	2394	0.974185
P39023	60S ribosomal protein L3 OS=Homo sapiens GN=RPL3 PE=1 SV=2	20517.7	19782.4	20350.6	21022	20150.1	20686.5	0.97407
Q13618	Cullin-3 OS=Homo sapiens GN=CUL3 PE=1 SV=2	142.4	156	144.8	161.6	149.2	153.2	0.97389
A0A0U1RRM4	Polypyrimidine tract-binding protein 1 OS=Homo sapiens GN=PTBP1 PE=1 SV=1	2873.2	2286.2	2588.3	2709.6	2579.7	2648.9	0.973876
P12956	X-ray repair cross-complementing protein 6 OS=Homo sapiens GN=XRCC6 PE=1 SV=2	4301.3	3849.6	4076	4294.7	4075.5	4185.4	0.973742
A0A087WUT6	Eukaryotic translation initiation factor 5B OS=Homo sapiens GN=EIF5B PE=1 SV=1	2841.8	2142.7	2305.3	2823.2	2492.3	2564.2	0.97196
Q9NY93	Probable ATP-dependent RNA helicase DDX56 OS=Homo sapiens GN=DDX56 PE=1 SV=1	72.2	80.2	71.2	85.7	76.2	78.4	0.971939
P30050	60S ribosomal protein L12 OS=Homo sapiens GN=RPL12 PE=1 SV=1	9236.8	8992	9242.9	9516.2	9114.4	9379.5	0.971736
Q9UJA5	tRNA (adenine(58)-N(1))-methyltransferase non-catalytic subunit TRM6 OS=Homo sapiens GN=TRMT6 PE=1 SV=1	918	853.6	878.2	945	885.8	911.6	0.971698
Q12905	Interleukin enhancer-binding factor 2 OS=Homo sapiens GN=ILF2 PE=1 SV=2	6449.2	5730.8	6451	6085	6090	6268	0.971602
Q9H0U9	Testis-specific Y-encoded-like protein 1 OS=Homo sapiens GN=TSPYL1 PE=1 SV=3	153.8	153.6	159	157.9	153.7	158.5	0.969716
P35249	Replication factor C subunit 4 OS=Homo sapiens GN=RFC4 PE=1 SV=2	508.3	499.7	542.6	497.6	504	520.1	0.969044
P68104	Elongation factor 1-alpha 1 OS=Homo sapiens GN=EEF1A1 PE=1 SV=1	1471.6	1330.8	1286.3	1608.3	1401.2	1447.3	0.968148
Q9NZB2-6	Isoform F of Constitutive coactivator of PPAR-gamma-like protein 1 OS=Homo sapiens GN=FAM120A	3329.1	3204	3347.1	3405.8	3266.6	3376.5	0.967452
P62318	Small nuclear ribonucleoprotein Sm D3 OS=Homo sapiens GN=SNRPD3 PE=1 SV=1	317.1	259.1	269.9	325.6	288.1	297.8	0.967428
P62829	60S ribosomal protein L23 OS=Homo sapiens GN=RPL23 PE=1 SV=1	12107.7	13434.5	12767.6	13650	12771.1	13208.7	0.96687
Q9BZI7	Regulator of nonsense transcripts 3B OS=Homo sapiens GN=UPF3B PE=1 SV=1	265.9	285.1	290	280.5	275.5	285.2	0.965989
P62899	60S ribosomal protein L31 OS=Homo sapiens GN=RPL31 PE=1 SV=1	6520	6598.3	6709.1	6871.7	6559.1	6790.4	0.965937
Q7Z460	CLIP-associating protein 1 OS=Homo sapiens GN=CLASP1 PE=1 SV=1	93.1	97.9	101.3	96.6	95.5	98.9	0.965622
A0A087WW66	26S proteasome non-ATPase regulatory subunit 1 OS=Homo sapiens GN=PSMD1 PE=1 SV=1	25.6	35	34.1	28.6	30.3	31.4	0.964968
Q15366-3	Isoform 3 of Poly(rC)-binding protein 2 OS=Homo sapiens GN=PCBP2	1197.7	1189	1201	1272.7	1193.3	1236.8	0.964829
P49770	Translation initiation factor eIF-2B subunit beta OS=Homo sapiens GN=EIF2B2 PE=1 SV=3	454.3	302.2	347.3	436.7	378.2	392	0.964796
P78527	DNA-dependent protein kinase catalytic subunit OS=Homo sapiens GN=PRKDC PE=1 SV=3	14845.4	13116.5	13331.7	15697	13981	14514.3	0.963257
P05198	Eukaryotic translation initiation factor 2 subunit 1 OS=Homo sapiens GN=EIF2S1 PE=1 SV=3	1956.2	2000	2009.5	2098.5	1978.1	2054	0.963048
H7C2Q8	EBNA1 binding protein 2, isoform CRA_d OS=Homo sapiens GN=EBNA1BP2 PE=1 SV=1	318.1	324.7	326.4	341.8	321.4	334.1	0.961987
Q6PGP7	Tetratricopeptide repeat protein 37 OS=Homo sapiens GN=TTC37 PE=1 SV=1	220.7	224.5	241.9	221.9	222.6	231.9	0.959897
O15226-2	Isoform 2 of NF-kappa-B-repressing factor OS=Homo sapiens GN=NKRF	554.7	469.3	517.7	549.1	512	533.4	0.95988
Q92843-2	Isoform 3 of Bcl-2-like protein 2 OS=Homo sapiens GN=BCL2L2	1996.1	1111.7	1520.7	1719.8	1553.9	1620.2	0.959079
O14654	Insulin receptor substrate 4 OS=Homo sapiens GN=IRS4 PE=1 SV=1	143.9	206	200.9	164.1	175	182.5	0.958904
Q16576-2	Isoform 2 of Histone-binding protein RBBP7 OS=Homo sapiens GN=RBBP7	112.5	85.1	99.6	106.8	98.8	103.2	0.957364
Q99471	Prefoldin subunit 5 OS=Homo sapiens GN=PFDN5 PE=1 SV=2	62.1	85.2	70.8	83.2	73.7	77	0.957143
P46777	60S ribosomal protein L5 OS=Homo sapiens GN=RPL5 PE=1 SV=3	16847.6	16016.8	16696	17665	16432.2	17180.6	0.956439
Q12906-7	Isoform 7 of Interleukin enhancer-binding factor 3 OS=Homo sapiens GN=ILF3	13136.9	10924.5	12570.6	12598	12030.7	12584.4	0.956001
Q9BX40	Protein LSM14 homolog B OS=Homo sapiens GN=LSM14B PE=1 SV=1	204.3	193.9	206.9	209.8	199.1	208.3	0.955833
P62269	40S ribosomal protein S18 OS=Homo sapiens GN=RPS18 PE=1 SV=3	9036.5	8441.3	8685.1	9619.7	8738.9	9152.4	0.954821
P62280	40S ribosomal protein S11 OS=Homo sapiens GN=RPS11 PE=1 SV=3	12154.4	10904.7	11829.6	12326	11529.6	12077.6	0.954627
P41091	Eukaryotic translation initiation factor 2 subunit 3 OS=Homo sapiens GN=EIF2S3 PE=1 SV=3	2513.4	2060.8	2241.6	2557.2	2287.1	2399.4	0.953197
Q15365	Poly(rC)-binding protein 1 OS=Homo sapiens GN=PCBP1 PE=1 SV=2	432.5	445.9	469.8	451.7	439.2	460.8	0.953125
P62857	40S ribosomal protein S28 OS=Homo sapiens GN=RPS28 PE=1 SV=1	3943.1	3527.3	3753.3	4089.5	3735.2	3921.4	0.952517
P63173	60S ribosomal protein L38 OS=Homo sapiens GN=RPL38 PE=1 SV=2	8789.3	9150.3	9532.8	9302.7	8969.8	9417.7	0.952441
P62979	Ubiquitin-40S ribosomal protein S27a OS=Homo sapiens GN=RPS27A PE=1 SV=2	2485.9	2371.2	2267.3	2841.4	2428.5	2554.3	0.95075
H7C2I1	Protein arginine N-methyltransferase 1 OS=Homo sapiens GN=PRMT1 PE=1 SV=1	377.3	382.4	405.7	393.5	379.9	399.6	0.950701
Q5T1Z8	Pumilio homolog 1 OS=Homo sapiens GN=PUM1 PE=1 SV=1	984.7	1026.9	1071.3	1049.8	1005.8	1060.6	0.948331
Q9BYG3	MKI67 FHA domain-interacting nucleolar phosphoprotein OS=Homo sapiens GN=NIFK PE=1 SV=1	550.9	508.6	582.9	534.5	529.7	558.7	0.948094
Q9UNQ2	Probable dimethyladenosine transferase OS=Homo sapiens GN=DIMT1 PE=1 SV=1	657	791.8	767.9	760.8	724.4	764.4	0.947671
Q9NRA8-3	Isoform 3 of Eukaryotic translation initiation factor 4E transporter OS=Homo sapiens GN=EIF4ENIF1	405.2	453.1	464.7	440.9	429.1	452.8	0.947659
B3KMB1	Structural maintenance of chromosomes protein OS=Homo sapiens PE=2 SV=1	205.2	202.3	241.6	188.3	203.7	215	0.947442
O76021	Ribosomal L1 domain-containing protein 1 OS=Homo sapiens GN=RSL1D1 PE=1 SV=3	1253.5	1307.4	1377.1	1326	1280.4	1351.6	0.947322
P50990	T-complex protein 1 subunit theta OS=Homo sapiens GN=CCT8 PE=1 SV=4	2295.2	3058.9	2626.3	3027	2677	2826.7	0.947041
P13807	Glycogen [starch] synthase, muscle OS=Homo sapiens GN=GYS1 PE=1 SV=2	8082.6	9737.5	9540.2	9287.7	8910	9414	0.946463
Q8WYQ5	Microprocessor complex subunit DGCR8 OS=Homo sapiens GN=DGCR8 PE=1 SV=1	288	298	286.9	333.3	293	310.1	0.944856
P26196	Probable ATP-dependent RNA helicase DDX6 OS=Homo sapiens GN=DDX6 PE=1 SV=2	3029.9	3119.7	3114.3	3395.1	3074.8	3254.7	0.944726
P19388	DNA-directed RNA polymerases I, II, and III subunit RPABC1 OS=Homo sapiens GN=POLR2E PE=1 SV=4	134.1	141.2	155.8	135.9	137.7	145.8	0.944444
Q9H7E2-3	Isoform 3 of Tudor domain-containing protein 3 OS=Homo sapiens GN=TDRD3	314.2	374	371.3	357.7	344.1	364.5	0.944033
Q13347	Eukaryotic translation initiation factor 3 subunit I OS=Homo sapiens GN=EIF3I PE=1 SV=1	3127.2	3115.4	3300.6	3314.5	3121.3	3307.6	0.943675
Q6PKG0	La-related protein 1 OS=Homo sapiens GN=LARP1 PE=1 SV=2	11131.2	10897.2	11639	11730	11014.2	11684.6	0.942625
Q08945	FACT complex subunit SSRP1 OS=Homo sapiens GN=SSRP1 PE=1 SV=1	151.8	177.7	183.8	166.1	164.8	175	0.941714
P62987	Ubiquitin-60S ribosomal protein L40 OS=Homo sapiens GN=UBA52 PE=1 SV=2	70.3	59	75.9	61.4	64.6	68.6	0.941691
Q8WWM7-3	Isoform 3 of Ataxin-2-like protein OS=Homo sapiens GN=ATXN2L	3328.8	3658.2	3630.4	3789.8	3493.5	3710.1	0.941619
A0A087WV05	Uncharacterized protein OS=Homo sapiens PE=4 SV=1	588.7	702.2	703.6	667.5	645.4	685.6	0.941365
Q92615	La-related protein 4B OS=Homo sapiens GN=LARP4B PE=1 SV=3	5162.3	4928.3	5456.3	5264.4	5045.3	5360.3	0.941235
Q96A72	Protein mago nashi homolog 2 OS=Homo sapiens GN=MAGOHB PE=1 SV=1	2847.9	2215.4	2649	2734.2	2531.6	2691.6	0.940556
P16989	Y-box-binding protein 3 OS=Homo sapiens GN=YBX3 PE=1 SV=4	2752.2	2605.9	2822.7	2874	2679	2848.4	0.940528
Q00577	Transcriptional activator protein Pur-alpha OS=Homo sapiens GN=PURA PE=1 SV=2	1266.6	1400.9	1406.3	1430.9	1333.8	1418.6	0.940223
P56192	Methionine--tRNA ligase, cytoplasmic OS=Homo sapiens GN=MARS PE=1 SV=2	4795.8	4626.3	5126.1	4904.5	4711.1	5015.3	0.939346
F8W8D3	Histone RNA hairpin-binding protein OS=Homo sapiens GN=SLBP PE=1 SV=1	53.8	56.5	53.4	64.2	55.2	58.8	0.938776
P15880	40S ribosomal protein S2 OS=Homo sapiens GN=RPS2 PE=1 SV=2	28015.6	27843.4	30299.2	29227	27929.5	29763	0.938397
Q9GZR7	ATP-dependent RNA helicase DDX24 OS=Homo sapiens GN=DDX24 PE=1 SV=1	1542.7	1693.5	1732.2	1717.1	1618.1	1724.7	0.938192
P62753	40S ribosomal protein S6 OS=Homo sapiens GN=RPS6 PE=1 SV=1	17460.1	17204.2	18203.8	18762	17332.1	18482.7	0.937747
A0A0U1RQC9	Cellular tumor antigen p53 OS=Homo sapiens GN=TP53 PE=1 SV=1	57.6	70.5	67.1	69.7	64.1	68.4	0.937134
O14979-2	Isoform 2 of Heterogeneous nuclear ribonucleoprotein D-like OS=Homo sapiens GN=HNRNPDL	3117.7	2042.5	2471.2	3040.1	2580.1	2755.7	0.936278
P06748	Nucleophosmin OS=Homo sapiens GN=NPM1 PE=1 SV=2	5984.8	4898.8	5507.2	6124.7	5441.8	5816	0.93566
B3KT93	Polyadenylate-binding protein OS=Homo sapiens PE=2 SV=1	16914.8	16086	17537.2	17735	16500.4	17636	0.935609
O75821	Eukaryotic translation initiation factor 3 subunit G OS=Homo sapiens GN=EIF3G PE=1 SV=2	2877.6	2632.9	2999.2	2892.1	2755.3	2945.6	0.935395
A0A087WYN9	ATP-dependent RNA helicase DHX29 OS=Homo sapiens GN=DHX29 PE=1 SV=1	533.3	516.3	540	583.8	524.8	561.9	0.933974
Q9BVP2	Guanine nucleotide-binding protein-like 3 OS=Homo sapiens GN=GNL3 PE=1 SV=2	5423.5	5347.4	5658.2	5875	5385.5	5766.6	0.933913
P62081	40S ribosomal protein S7 OS=Homo sapiens GN=RPS7 PE=1 SV=1	9317.9	9215.2	9826.4	10034	9266.5	9930.4	0.933145
Q6NZY4	Zinc finger CCHC domain-containing protein 8 OS=Homo sapiens GN=ZCCHC8 PE=1 SV=2	64.5	55.2	62.2	66	59.8	64.1	0.932917
Q09161	Nuclear cap-binding protein subunit 1 OS=Homo sapiens GN=NCBP1 PE=1 SV=1	374.6	362.9	406.8	384.7	368.8	395.7	0.932019
P62847-4	Isoform 4 of 40S ribosomal protein S24 OS=Homo sapiens GN=RPS24	5625.5	5727.5	6029.4	6173.5	5676.5	6101.5	0.930345
Q15024	Exosome complex component RRP42 OS=Homo sapiens GN=EXOSC7 PE=1 SV=3	536.7	462.7	519.3	555	499.7	537.2	0.930194
P62888	60S ribosomal protein L30 OS=Homo sapiens GN=RPL30 PE=1 SV=2	9553.4	7601.5	9154.2	9359.2	8577.4	9256.7	0.926615
P46976	Glycogenin-1 OS=Homo sapiens GN=GYG1 PE=1 SV=4	893.4	1180.9	1095.7	1143.1	1037.2	1119.4	0.926568
Q9BZE4	Nucleolar GTP-binding protein 1 OS=Homo sapiens GN=GTPBP4 PE=1 SV=3	3066.5	2834.4	3142.2	3230.4	2950.4	3186.3	0.925964
P49207	60S ribosomal protein L34 OS=Homo sapiens GN=RPL34 PE=1 SV=3	9629.5	7706.1	8839.5	9887.7	8667.8	9363.6	0.925691
P50914	60S ribosomal protein L14 OS=Homo sapiens GN=RPL14 PE=1 SV=4	7253	7859.9	8001	8329.6	7556.5	8165.3	0.925441
Q7Z417	Nuclear fragile X mental retardation-interacting protein 2 OS=Homo sapiens GN=NUFIP2 PE=1 SV=1	3817.7	3855.1	4106.8	4187.3	3836.4	4147.1	0.92508
Q96DH6	RNA-binding protein Musashi homolog 2 OS=Homo sapiens GN=MSI2 PE=1 SV=1	1502.9	1550.1	1583.9	1718.6	1526.5	1651.2	0.924479
P16989-2	Isoform 2 of Y-box-binding protein 3 OS=Homo sapiens GN=YBX3	490.2	449.7	479.3	537.5	469.9	508.4	0.924272
Q9NSD9	Phenylalanine--tRNA ligase beta subunit OS=Homo sapiens GN=FARSB PE=1 SV=3	1961.9	1355.2	1569.2	2020.2	1658.6	1794.7	0.924166
Q8NCA5	Protein FAM98A OS=Homo sapiens GN=FAM98A PE=1 SV=1	1508.4	1502.2	1560	1704.5	1505.3	1632.2	0.922252
Q9Y5S9	RNA-binding protein 8A OS=Homo sapiens GN=RBM8A PE=1 SV=1	2620.1	1856.3	2363.9	2489.9	2238.2	2426.9	0.922246
P26368	Splicing factor U2AF 65 kDa subunit OS=Homo sapiens GN=U2AF2 PE=1 SV=4	32.4	41.1	43.6	36.1	36.7	39.8	0.922111
E7EQZ4	Survival motor neuron protein OS=Homo sapiens GN=SMN1 PE=1 SV=1	417.9	452.8	441.8	502.6	435.4	472.2	0.922067
P08238	Heat shock protein HSP 90-beta OS=Homo sapiens GN=HSP90AB1 PE=1 SV=4	761.8	873.7	855.4	924	817.7	889.7	0.919074
O00425	Insulin-like growth factor 2 mRNA-binding protein 3 OS=Homo sapiens GN=IGF2BP3 PE=1 SV=2	5899.7	6049.3	6602.3	6400.2	5974.5	6501.2	0.918984
Q96T21	Selenocysteine insertion sequence-binding protein 2 OS=Homo sapiens GN=SECISBP2 PE=1 SV=2	44.7	65.6	53	67.3	55.2	60.1	0.918469
Q71RC2-4	Isoform 4 of La-related protein 4 OS=Homo sapiens GN=LARP4	2752.6	2751.2	2897.8	3098.6	2751.9	2998.2	0.917851
Q9UQ80-2	Isoform 2 of Proliferation-associated protein 2G4 OS=Homo sapiens GN=PA2G4	514.8	477.7	510.6	570.7	496.2	540.7	0.917699
Q99436	Proteasome subunit beta type-7 OS=Homo sapiens GN=PSMB7 PE=1 SV=1	264.5	331.8	305.7	344.6	298.1	325.1	0.916949
P57678	Gem-associated protein 4 OS=Homo sapiens GN=GEMIN4 PE=1 SV=2	1260.6	1386.5	1373.1	1514	1323.6	1443.5	0.916938
P29558	RNA-binding motif, single-stranded-interacting protein 1 OS=Homo sapiens GN=RBMS1 PE=1 SV=3	528.5	433.5	517.8	531.5	481	524.6	0.916889
P49006	MARCKS-related protein OS=Homo sapiens GN=MARCKSL1 PE=1 SV=2	73.2	65.6	79.9	71.5	69.4	75.7	0.916777
P07814	Bifunctional glutamate/proline--tRNA ligase OS=Homo sapiens GN=EPRS PE=1 SV=5	13795	12181.1	14227.2	14129	12988.1	14178.1	0.916068
P41252	Isoleucine--tRNA ligase, cytoplasmic OS=Homo sapiens GN=IARS PE=1 SV=2	7841.5	7454.1	8281.8	8426	7647.8	8353.9	0.915477
K7ELC2	40S ribosomal protein S15 OS=Homo sapiens GN=RPS15 PE=1 SV=1	8770.6	8424.1	9214.4	9584.5	8597.4	9399.4	0.914675
Q96MX6	WD repeat-containing protein 92 OS=Homo sapiens GN=WDR92 PE=1 SV=1	47.1	56.5	53.2	60.2	51.8	56.7	0.91358
P81605-2	Isoform 2 of Dermcidin OS=Homo sapiens GN=DCD	1226.4	979.8	614.2	1800.9	1103.1	1207.6	0.913465
P80723	Brain acid soluble protein 1 OS=Homo sapiens GN=BASP1 PE=1 SV=2	54.5	72.2	63.4	75.1	63.3	69.3	0.91342
Q9NZI8	Insulin-like growth factor 2 mRNA-binding protein 1 OS=Homo sapiens GN=IGF2BP1 PE=1 SV=2	10247.4	10137	11125.8	11195	10192.2	11160.2	0.913263
Q14103	Heterogeneous nuclear ribonucleoprotein D0 OS=Homo sapiens GN=HNRNPD PE=1 SV=1	4573.1	2629.2	3532.1	4355.7	3601.1	3943.9	0.913081
P35030	Trypsin-3 OS=Homo sapiens GN=PRSS3 PE=1 SV=2	355.8	595.9	412.8	630.9	475.9	521.9	0.911861
P50991	T-complex protein 1 subunit delta OS=Homo sapiens GN=CCT4 PE=1 SV=4	932.5	1013.1	998	1137.1	972.8	1067.6	0.911203
P51116	Fragile X mental retardation syndrome-related protein 2 OS=Homo sapiens GN=FXR2 PE=1 SV=2	1480	1710.4	1754	1752.5	1595.2	1753.3	0.909827
Q10567	AP-1 complex subunit beta-1 OS=Homo sapiens GN=AP1B1 PE=1 SV=2	173.9	147.7	173.5	180.2	160.8	176.8	0.909502
Q9Y230	RuvB-like 2 OS=Homo sapiens GN=RUVBL2 PE=1 SV=3	723.4	725.5	781.7	811.5	724.5	796.6	0.90949
P35998	26S protease regulatory subunit 7 OS=Homo sapiens GN=PSMC2 PE=1 SV=3	125	156.4	145.1	164.6	140.7	154.9	0.908328
P47897	Glutamine--tRNA ligase OS=Homo sapiens GN=QARS PE=1 SV=1	4285.2	4161.3	4652.6	4652.9	4223.3	4652.8	0.90769
P08708	40S ribosomal protein S17 OS=Homo sapiens GN=RPS17 PE=1 SV=2	12426.1	12187.9	13192.5	13939	12307	13565.7	0.907215
Q9HCE1	Putative helicase MOV-10 OS=Homo sapiens GN=MOV10 PE=1 SV=2	2078.9	2086.1	2262.8	2331.5	2082.5	2297.1	0.906578
Q96I24	Far upstream element-binding protein 3 OS=Homo sapiens GN=FUBP3 PE=1 SV=2	91.2	110.3	115.1	107.1	100.7	111.1	0.906391
O60506	Heterogeneous nuclear ribonucleoprotein Q OS=Homo sapiens GN=SYNCRIP PE=1 SV=2	21800.5	18970.9	21951.1	23052	20385.7	22501.6	0.905967
Q9H6S0	Probable ATP-dependent RNA helicase YTHDC2 OS=Homo sapiens GN=YTHDC2 PE=1 SV=2	875.1	935.1	1040.4	959.2	905.1	999.8	0.905281
Q9NWZ8	Gem-associated protein 8 OS=Homo sapiens GN=GEMIN8 PE=1 SV=1	169	190.1	179.3	217.5	179.6	198.4	0.905242
P62249	40S ribosomal protein S16 OS=Homo sapiens GN=RPS16 PE=1 SV=2	12450.7	10532.4	12597.7	12838	11491.6	12717.7	0.903591
A0A0G2JIW1	Heat shock 70 kDa protein 1B OS=Homo sapiens GN=HSPA1B PE=1 SV=1	1028.1	1102.2	1242.5	1116.1	1065.2	1179.3	0.903248
P05388	60S acidic ribosomal protein P0 OS=Homo sapiens GN=RPLP0 PE=1 SV=1	19203.9	19320.5	20947.9	21721	19262.2	21334.4	0.90287
Q06787	Synaptic functional regulator FMR1 OS=Homo sapiens GN=FMR1 PE=1 SV=1	1574.5	1629.4	1829.2	1724.7	1602	1777	0.901519
Q99832	T-complex protein 1 subunit eta OS=Homo sapiens GN=CCT7 PE=1 SV=2	497.5	624.2	578.4	667.1	560.8	622.7	0.900594
P62266	40S ribosomal protein S23 OS=Homo sapiens GN=RPS23 PE=1 SV=3	9606	8005.7	8895.2	10662	8805.8	9778.7	0.900508
P12532-2	Isoform 2 of Creatine kinase U-type, mitochondrial OS=Homo sapiens GN=CKMT1A	290.8	311.3	354.4	315.5	301	334.9	0.898776
P39019	40S ribosomal protein S19 OS=Homo sapiens GN=RPS19 PE=1 SV=2	21365.2	18153.3	21275.4	22694	19759.2	21984.7	0.898771
Q9UKV8	Protein argonaute-2 OS=Homo sapiens GN=AGO2 PE=1 SV=3	528.8	557.9	582.4	626.8	543.3	604.6	0.898611
Q9Y3I0	tRNA-splicing ligase RtcB homolog OS=Homo sapiens GN=RTCB PE=1 SV=1	4183	4009.8	4412.3	4725.3	4096.4	4568.8	0.896603
Q9H2U1	ATP-dependent RNA helicase DHX36 OS=Homo sapiens GN=DHX36 PE=1 SV=2	884	993.1	1028.1	1065.7	938.5	1046.9	0.896456
P32969	60S ribosomal protein L9 OS=Homo sapiens GN=RPL9 PE=1 SV=1	10162.7	9911.1	10915.7	11532	10036.9	11223.7	0.894259
P31946	14-3-3 protein beta/alpha OS=Homo sapiens GN=YWHAB PE=1 SV=3	1189.3	1243.2	1316.9	1406	1216.2	1361.4	0.893345
P62136-2	Isoform 2 of Serine/threonine-protein phosphatase PP1-alpha catalytic subunit OS=Homo sapiens GN=PPP1CA	199.1	174	208.8	209.2	186.6	209	0.892823
P40227	T-complex protein 1 subunit zeta OS=Homo sapiens GN=CCT6A PE=1 SV=3	699.4	878.3	836	930.9	788.8	883.5	0.892813
P23396	40S ribosomal protein S3 OS=Homo sapiens GN=RPS3 PE=1 SV=2	27074.8	24653.3	28444.5	29499	25864	28971.8	0.89273
Q15046	Lysine--tRNA ligase OS=Homo sapiens GN=KARS PE=1 SV=3	4018.8	3435.7	4152.5	4212.1	3727.2	4182.3	0.891184
P68363	Tubulin alpha-1B chain OS=Homo sapiens GN=TUBA1B PE=1 SV=1	597.8	782.6	770.5	781	690.2	775.7	0.889777
Q9Y520-7	Isoform 7 of Protein PRRC2C OS=Homo sapiens GN=PRRC2C	5582.6	5539.9	6194.2	6320.8	5561.3	6257.5	0.888742
Q9P2J5	Leucine--tRNA ligase, cytoplasmic OS=Homo sapiens GN=LARS PE=1 SV=2	9757.2	8642.2	10339.1	10380	9199.7	10359.6	0.888036
O75817	Ribonuclease P protein subunit p20 OS=Homo sapiens GN=POP7 PE=1 SV=2	137.7	130.5	138.2	164.1	134.1	151.1	0.887492
P20042	Eukaryotic translation initiation factor 2 subunit 2 OS=Homo sapiens GN=EIF2S2 PE=1 SV=2	5049.4	4008.2	4724.3	5483.2	4528.8	5103.8	0.887339
E7ERK9	Translation initiation factor eIF-2B subunit delta OS=Homo sapiens GN=EIF2B4 PE=1 SV=1	294.6	232	276.9	316.9	263.3	296.9	0.886831
P56537	Eukaryotic translation initiation factor 6 OS=Homo sapiens GN=EIF6 PE=1 SV=1	570.2	579.7	641	658.2	575	649.6	0.88516
Q12904	Aminoacyl tRNA synthase complex-interacting multifunctional protein 1 OS=Homo sapiens GN=AIMP1 PE=1 SV=2	3119.2	2770.2	3207.6	3454.3	2944.7	3330.9	0.884055
P48634	Protein PRRC2A OS=Homo sapiens GN=PRRC2A PE=1 SV=3	1835.1	1816.8	2080.8	2050.6	1825.9	2065.7	0.883913
P49755	Transmembrane emp24 domain-containing protein 10 OS=Homo sapiens GN=TMED10 PE=1 SV=2	90.8	106.6	114.4	109	98.7	111.7	0.883617
Q8N5L8	Ribonuclease P protein subunit p25-like protein OS=Homo sapiens GN=RPP25L PE=1 SV=1	58.1	57.2	67.1	63.6	57.7	65.3	0.883614
P67809	Nuclease-sensitive element-binding protein 1 OS=Homo sapiens GN=YBX1 PE=1 SV=3	7549.8	6245.7	7736.3	7894.8	6897.7	7815.6	0.882555
Q08J23	tRNA (cytosine(34)-C(5))-methyltransferase OS=Homo sapiens GN=NSUN2 PE=1 SV=2	6545.6	5559.4	6260.2	7472.1	6052.5	6866.2	0.881492
P07237	Protein disulfide-isomerase OS=Homo sapiens GN=P4HB PE=1 SV=3	130.3	163.1	168	165.3	146.7	166.6	0.880552
P46781	40S ribosomal protein S9 OS=Homo sapiens GN=RPS9 PE=1 SV=3	15462.6	14343.4	16593.5	17285	14903	16939.4	0.879783
P54136	Arginine--tRNA ligase, cytoplasmic OS=Homo sapiens GN=RARS PE=1 SV=2	7722.3	6847.6	8081	8503.7	7285	8292.4	0.878515
P60709	Actin, cytoplasmic 1 OS=Homo sapiens GN=ACTB PE=1 SV=1	455.4	557.3	596.7	557.8	506.3	577.2	0.877166
Q15649	Zinc finger HIT domain-containing protein 3 OS=Homo sapiens GN=ZNHIT3 PE=1 SV=2	200.4	141.7	194.2	195.8	171	195	0.876923
P46782	40S ribosomal protein S5 OS=Homo sapiens GN=RPS5 PE=1 SV=4	14926	12832	15593.7	16062	13879	15827.8	0.876875
Q9NVU7	Protein SDA1 homolog OS=Homo sapiens GN=SDAD1 PE=1 SV=3	244.5	229.1	270.8	269.3	236.8	270.1	0.876712
O00139-4	Isoform 4 of Kinesin-like protein KIF2A OS=Homo sapiens GN=KIF2A	135.5	109.2	146.7	132.4	122.3	139.5	0.876703
Q5RKV6	Exosome complex component MTR3 OS=Homo sapiens GN=EXOSC6 PE=1 SV=1	78.2	45.5	61.4	79.6	61.8	70.5	0.876596
B1AHD1	NHP2-like protein 1 OS=Homo sapiens GN=SNU13 PE=1 SV=1	166	127.3	160.1	174.7	146.7	167.4	0.876344
P62736	Actin, aortic smooth muscle OS=Homo sapiens GN=ACTA2 PE=1 SV=1	309.4	401.8	413.1	399.8	355.6	406.4	0.875
P14868	Aspartate--tRNA ligase, cytoplasmic OS=Homo sapiens GN=DARS PE=1 SV=2	3938.9	3370.8	4134.2	4230.7	3654.9	4182.4	0.873876
P78371	T-complex protein 1 subunit beta OS=Homo sapiens GN=CCT2 PE=1 SV=4	518.2	674.5	615.4	749.4	596.3	682.4	0.873828
E9PRY8	Elongation factor 1-delta OS=Homo sapiens GN=EEF1D PE=1 SV=1	174.4	189.3	169.6	246.9	181.8	208.2	0.873199
P60228	Eukaryotic translation initiation factor 3 subunit E OS=Homo sapiens GN=EIF3E PE=1 SV=1	3353.3	3527.8	3860.4	4047.7	3440.6	3954.1	0.870135
Q99613	Eukaryotic translation initiation factor 3 subunit C OS=Homo sapiens GN=EIF3C PE=1 SV=1	6838.9	6589.8	7508.9	7960.7	6714.3	7734.8	0.868064
B3KSH1	Eukaryotic translation initiation factor 3 subunit F OS=Homo sapiens GN=EIF3F PE=2 SV=1	2263.4	2504.7	2646.5	2848.1	2384	2747.3	0.867761
P51149	Ras-related protein Rab-7a OS=Homo sapiens GN=RAB7A PE=1 SV=1	93.7	111.9	131	106	102.8	118.5	0.867511
Q9NUD5	Zinc finger CCHC domain-containing protein 3 OS=Homo sapiens GN=ZCCHC3 PE=1 SV=1	475.2	485.4	535.3	572.3	480.3	553.8	0.867281
Q5JSZ5	Protein PRRC2B OS=Homo sapiens GN=PRRC2B PE=1 SV=2	1272.2	1174.7	1345.3	1476.2	1223.4	1410.7	0.867229
B0QY89	Eukaryotic translation initiation factor 3 subunit L OS=Homo sapiens GN=EIF3L PE=1 SV=1	6901.4	7251.6	8070.8	8284.8	7076.5	8177.8	0.865331
Q9NW13	RNA-binding protein 28 OS=Homo sapiens GN=RBM28 PE=1 SV=3	1028	1101.9	1196.6	1270	1064.9	1233.3	0.863456
Q99700	Ataxin-2 OS=Homo sapiens GN=ATXN2 PE=1 SV=2	798	891.4	1031.2	930.2	844.7	980.7	0.861324
P05386	60S acidic ribosomal protein P1 OS=Homo sapiens GN=RPLP1 PE=1 SV=1	7059.5	6464.1	7638.1	8064.2	6761.8	7851.2	0.861244
P62701	40S ribosomal protein S4, X isoform OS=Homo sapiens GN=RPS4X PE=1 SV=2	23165.4	20250.8	24097	26345	21708.1	25220.8	0.860722
P60842	Eukaryotic initiation factor 4A-I OS=Homo sapiens GN=EIF4A1 PE=1 SV=1	2291.6	2308.9	2739	2610.8	2300.3	2674.9	0.859957
O43324	Eukaryotic translation elongation factor 1 epsilon-1 OS=Homo sapiens GN=EEF1E1 PE=1 SV=1	826.7	697.8	857.5	917.6	762.3	887.5	0.85893
Q9H361	Polyadenylate-binding protein 3 OS=Homo sapiens GN=PABPC3 PE=1 SV=2	552.2	542.8	604.6	670.5	547.5	637.6	0.858689
Q92499	ATP-dependent RNA helicase DDX1 OS=Homo sapiens GN=DDX1 PE=1 SV=2	3888.4	3776.5	4258	4674.1	3832.4	4466.1	0.858109
Q7KZF4	Staphylococcal nuclease domain-containing protein 1 OS=Homo sapiens GN=SND1 PE=1 SV=1	424.4	461.4	484	548.3	442.9	516.2	0.858001
Q6ZN17	Protein lin-28 homolog B OS=Homo sapiens GN=LIN28B PE=1 SV=1	322.2	315	333.1	409.6	318.6	371.4	0.857835
P19338	Nucleolin OS=Homo sapiens GN=NCL PE=1 SV=3	8636.2	5498.9	6705.6	9816.6	7067.5	8261.1	0.855516
Q9UBQ5	Eukaryotic translation initiation factor 3 subunit K OS=Homo sapiens GN=EIF3K PE=1 SV=1	1655.5	1850.1	2011.1	2093.8	1752.8	2052.4	0.854025
Q9NZT1	Calmodulin-like protein 5 OS=Homo sapiens GN=CALML5 PE=1 SV=2	71.1	83.7	94.7	86.9	77.4	90.8	0.852423
Q96FX7	tRNA (adenine(58)-N(1))-methyltransferase catalytic subunit TRMT61A OS=Homo sapiens GN=TRMT61A PE=1 SV=1	68	77.1	79.5	91.1	72.5	85.3	0.849941
Q9Y224	UPF0568 protein C14orf166 OS=Homo sapiens GN=C14orf166 PE=1 SV=1	3137.5	3127.8	3623.3	3769.7	3132.7	3696.5	0.847477
P51148-2	Isoform 2 of Ras-related protein Rab-5C OS=Homo sapiens GN=RAB5C	47.1	52.9	60.8	57.2	50	59	0.847458
P53396	ATP-citrate synthase OS=Homo sapiens GN=ACLY PE=1 SV=3	242.7	249.2	272.9	307.8	246	290.4	0.847107
P61981	14-3-3 protein gamma OS=Homo sapiens GN=YWHAG PE=1 SV=2	634.3	640.8	725.1	782.2	637.5	753.6	0.845939
Q14152	Eukaryotic translation initiation factor 3 subunit A OS=Homo sapiens GN=EIF3A PE=1 SV=1	13841.1	13474.4	15971.4	16343	13657.8	16157	0.845318
P51114	Fragile X mental retardation syndrome-related protein 1 OS=Homo sapiens GN=FXR1 PE=1 SV=3	287	287.6	317.4	364.5	287.3	340.9	0.842769
O15371	Eukaryotic translation initiation factor 3 subunit D OS=Homo sapiens GN=EIF3D PE=1 SV=1	4631.1	4423.8	5249.3	5552	4527.5	5400.7	0.838317
Q9H074	Polyadenylate-binding protein-interacting protein 1 OS=Homo sapiens GN=PAIP1 PE=1 SV=1	67.1	74.8	79.6	89.5	70.9	84.6	0.838061
Q86UK7	Zinc finger protein 598 OS=Homo sapiens GN=ZNF598 PE=1 SV=1	9.8	4.4	9	7.9	7.1	8.5	0.835294
O00410-3	Isoform 3 of Importin-5 OS=Homo sapiens GN=IPO5	74.7	88.6	101.6	94.3	81.7	98	0.833673
Q9Y5A9	YTH domain-containing family protein 2 OS=Homo sapiens GN=YTHDF2 PE=1 SV=2	1395	1221.8	1499.7	1639.3	1308.4	1569.5	0.833641
Q969S3	Zinc finger protein 622 OS=Homo sapiens GN=ZNF622 PE=1 SV=1	83.7	125.9	118.1	133.5	104.8	125.8	0.833068
P63261	Actin, cytoplasmic 2 OS=Homo sapiens GN=ACTG1 PE=1 SV=1	334.3	446.8	490.9	446.9	390.5	468.9	0.8328
Q8ND56	Protein LSM14 homolog A OS=Homo sapiens GN=LSM14A PE=1 SV=3	1271.3	1151.4	1496.9	1424.7	1211.4	1460.8	0.829272
Q6IBR2	FARSLA protein OS=Homo sapiens GN=FARSLA PE=2 SV=1	607.1	485.9	517.3	803.9	546.5	660.6	0.827278
Q9BZK3	Putative nascent polypeptide-associated complex subunit alpha-like protein OS=Homo sapiens GN=NACAP1 PE=5 SV=1	157.1	149.5	162	208.9	153.3	185.4	0.826861
P11586	C-1-tetrahydrofolate synthase, cytoplasmic OS=Homo sapiens GN=MTHFD1 PE=1 SV=3	6878.1	4629.2	6213	7742.1	5753.7	6977.5	0.824608
O75569	Interferon-inducible double-stranded RNA-dependent protein kinase activator A OS=Homo sapiens GN=PRKRA PE=1 SV=1	431.2	427.2	512.4	529.2	429.2	520.8	0.824117
P08195-4	Isoform 4 of 4F2 cell-surface antigen heavy chain OS=Homo sapiens GN=SLC3A2	104.1	162.9	173.8	150.8	133.5	162.3	0.822551
Q9UIV1	CCR4-NOT transcription complex subunit 7 OS=Homo sapiens GN=CNOT7 PE=1 SV=3	303.9	300.4	354.9	380.1	302.2	367.5	0.822313
O75534-4	Isoform 4 of Cold shock domain-containing protein E1 OS=Homo sapiens GN=CSDE1	16.6	13.3	15.2	21.5	15	18.3	0.819672
P11142	Heat shock cognate 71 kDa protein OS=Homo sapiens GN=HSPA8 PE=1 SV=1	3076.2	2447.3	3598.3	3145.1	2761.8	3371.7	0.819112
P48643	T-complex protein 1 subunit epsilon OS=Homo sapiens GN=CCT5 PE=1 SV=1	492.4	593.2	610.2	717.3	542.8	663.8	0.817716
Q96QR8	Transcriptional activator protein Pur-beta OS=Homo sapiens GN=PURB PE=1 SV=3	301.8	223.5	318.7	324	262.7	321.3	0.817616
Q14694-2	Isoform 2 of Ubiquitin carboxyl-terminal hydrolase 10 OS=Homo sapiens GN=USP10	1434.8	1897.5	2017	2060.8	1666.2	2038.9	0.817205
B3KTL8	cDNA FLJ38476 fis, clone FEBRA2022504, highly similar to YTH domain protein 1 OS=Homo sapiens PE=2 SV=1	414.1	341.9	456.7	468.7	378	462.7	0.816944
P49368	T-complex protein 1 subunit gamma OS=Homo sapiens GN=CCT3 PE=1 SV=4	830.2	1005.8	1036.5	1211.9	918	1124.2	0.816581
Q3MHD2-2	Isoform 2 of Protein LSM12 homolog OS=Homo sapiens GN=LSM12	148.3	121.4	169.2	161.6	134.9	165.4	0.815599
P62158	Calmodulin OS=Homo sapiens GN=CALM1 PE=1 SV=2	446.6	549.9	602.1	622.1	498.3	612.1	0.814083
P17987	T-complex protein 1 subunit alpha OS=Homo sapiens GN=TCP1 PE=1 SV=1	1148.7	1530.5	1397.7	1893.8	1339.6	1645.7	0.814
Q9UQ80	Proliferation-associated protein 2G4 OS=Homo sapiens GN=PA2G4 PE=1 SV=3	16220.6	14258.5	17464.1	19988	15239.5	18726.1	0.813811
B3KS98	Eukaryotic translation initiation factor 3 subunit H OS=Homo sapiens GN=EIF3H PE=1 SV=1	1702.5	1615.3	2000.3	2086.5	1658.9	2043.4	0.811833
P52298	Nuclear cap-binding protein subunit 2 OS=Homo sapiens GN=NCBP2 PE=1 SV=1	161.8	98.1	159.6	160.7	129.9	160.1	0.811368
Q8NC51	Plasminogen activator inhibitor 1 RNA-binding protein OS=Homo sapiens GN=SERBP1 PE=1 SV=2	19228.1	17401.1	22217.2	23165	18314.6	22690.9	0.807134
P55884-2	Isoform 2 of Eukaryotic translation initiation factor 3 subunit B OS=Homo sapiens GN=EIF3B	7441.7	7203.1	8749.7	9402.2	7322.4	9076	0.806787
Q9BRJ6	Uncharacterized protein C7orf50 OS=Homo sapiens GN=C7orf50 PE=1 SV=1	905.1	919.2	1004.5	1259.4	912.2	1132	0.80583
Q96HR8	H/ACA ribonucleoprotein complex non-core subunit NAF1 OS=Homo sapiens GN=NAF1 PE=1 SV=2	70.7	92.8	105.9	97	81.7	101.5	0.804926
Q14157-5	Isoform 5 of Ubiquitin-associated protein 2-like OS=Homo sapiens GN=UBAP2L	1659.1	1783.1	2032	2267.9	1721.1	2150	0.800512
Q15650	Activating signal cointegrator 1 OS=Homo sapiens GN=TRIP4 PE=1 SV=4	99.6	95.6	122.1	122.3	97.6	122.2	0.798691
O60832	H/ACA ribonucleoprotein complex subunit 4 OS=Homo sapiens GN=DKC1 PE=1 SV=3	225.6	193.2	271.9	253.8	209.4	262.8	0.796804
P62854	40S ribosomal protein S26 OS=Homo sapiens GN=RPS26 PE=1 SV=3	3193.9	2619.9	3679.2	3622.2	2906.9	3650.7	0.796258
Q9C0B0	RING finger protein unkempt homolog OS=Homo sapiens GN=UNK PE=1 SV=2	159.3	157.9	200.5	198.8	158.6	199.6	0.794589
Q7L2H7	Eukaryotic translation initiation factor 3 subunit M OS=Homo sapiens GN=EIF3M PE=1 SV=1	2129	2260.8	2646.2	2883.6	2194.9	2764.9	0.793844
O43399-7	Isoform 7 of Tumor protein D54 OS=Homo sapiens GN=TPD52L2	250.6	373.9	421.2	369.9	312.3	395.5	0.789633
Q8N6T3-2	Isoform 2 of ADP-ribosylation factor GTPase-activating protein 1 OS=Homo sapiens GN=ARFGAP1	128.7	189.3	198.9	204.3	159	201.6	0.78869
O95816	BAG family molecular chaperone regulator 2 OS=Homo sapiens GN=BAG2 PE=1 SV=1	236.2	212.3	265.7	306.9	224.3	286.3	0.783444
P05455	Lupus La protein OS=Homo sapiens GN=SSB PE=1 SV=2	2122.1	2094	2597.3	2787.9	2108.1	2692.6	0.782924
P06730-2	Isoform 2 of Eukaryotic translation initiation factor 4E OS=Homo sapiens GN=EIF4E	1046.7	1079.1	1299.4	1425.7	1062.9	1362.5	0.78011
D3DQV9	Eukaryotic translation initiation factor 4 gamma 2 (Fragment) OS=Homo sapiens GN=EIF4G2 PE=1 SV=1	2775.4	2790.5	3475.3	3665.1	2782.9	3570.2	0.77948
P62258	14-3-3 protein epsilon OS=Homo sapiens GN=YWHAE PE=1 SV=1	4391.3	3745.9	5085.8	5403.5	4068.6	5244.6	0.775769
P62820	Ras-related protein Rab-1A OS=Homo sapiens GN=RAB1A PE=1 SV=3	348.9	471.3	553.3	514.3	410.1	533.8	0.768265
O95985	DNA topoisomerase 3-beta-1 OS=Homo sapiens GN=TOP3B PE=1 SV=1	32.2	19	30.7	36.8	25.6	33.8	0.757396
O43760-2	Isoform 2 of Synaptogyrin-2 OS=Homo sapiens GN=SYNGR2	155.2	208.6	271.2	209.4	181.9	240.3	0.75697
O15234	Protein CASC3 OS=Homo sapiens GN=CASC3 PE=1 SV=2	181.5	191.2	232.5	262.6	186.3	247.5	0.752727
P27348	14-3-3 protein theta OS=Homo sapiens GN=YWHAQ PE=1 SV=1	203.9	195.4	259.4	282.9	199.6	271.2	0.735988
Q9BPZ3	Polyadenylate-binding protein-interacting protein 2 OS=Homo sapiens GN=PAIP2 PE=1 SV=1	102.5	105.1	132.7	151.4	103.8	142.1	0.730472
E7EQR4	Ezrin OS=Homo sapiens GN=EZR PE=1 SV=3	150	208.3	249.5	254	179.1	251.7	0.711561
Q04637-8	Isoform 8 of Eukaryotic translation initiation factor 4 gamma 1 OS=Homo sapiens GN=EIF4G1	8456.2	8036	11435.8	11959	8246.1	11697.5	0.704946
Q15836	Vesicle-associated membrane protein 3 OS=Homo sapiens GN=VAMP3 PE=1 SV=3	120.4	155.3	227.1	174.3	137.9	200.7	0.687095
P13639	Elongation factor 2 OS=Homo sapiens GN=EEF2 PE=1 SV=4	35454.3	32017.8	49273.6	49476	33736.1	49374.6	0.683268
O14828	Secretory carrier-associated membrane protein 3 OS=Homo sapiens GN=SCAMP3 PE=1 SV=3	193.6	218.3	306.4	297.6	206	302	0.682119
P07195	L-lactate dehydrogenase B chain OS=Homo sapiens GN=LDHB PE=1 SV=2	97.7	129.7	140.5	195	113.7	167.7	0.677996
Q9H0U4	Ras-related protein Rab-1B OS=Homo sapiens GN=RAB1B PE=1 SV=1	313.9	375.5	547.9	475.6	344.7	511.8	0.673505
F8W7C6	60S ribosomal protein L10 OS=Homo sapiens GN=RPL10 PE=1 SV=2	1907.8	1640.5	2282	2998.7	1774.2	2640.3	0.671969
Q16563	Synaptophysin-like protein 1 OS=Homo sapiens GN=SYPL1 PE=1 SV=1	178	246.5	336.6	298.2	212.3	317.4	0.668872
P07355-2	Isoform 2 of Annexin A2 OS=Homo sapiens GN=ANXA2	308.8	386.7	516.4	525.5	347.8	520.9	0.667691
Q14444	Caprin-1 OS=Homo sapiens GN=CAPRIN1 PE=1 SV=2	5926	6459.5	8913.8	9739.9	6192.8	9326.9	0.663972
Q13283	Ras GTPase-activating protein-binding protein 1 OS=Homo sapiens GN=G3BP1 PE=1 SV=1	5990.9	6442.1	9586.1	9856	6216.5	9721.1	0.639485
P05556-3	Isoform 3 of Integrin beta-1 OS=Homo sapiens GN=ITGB1	142.9	169.5	258.8	231	156.2	244.9	0.637811
Q15758	Neutral amino acid transporter B(0) OS=Homo sapiens GN=SLC1A5 PE=1 SV=2	222.8	310.9	458.8	395.9	266.9	427.4	0.624474
P16520	Guanine nucleotide-binding protein G(I)/G(S)/G(T) subunit beta-3 OS=Homo sapiens GN=GNB3 PE=1 SV=1	149.4	165.2	286.4	252.7	157.3	269.5	0.583673
P35613	Basigin OS=Homo sapiens GN=BSG PE=1 SV=2	488.7	517.2	984.6	840.1	503	912.4	0.551293
P05023	Sodium/potassium-transporting ATPase subunit alpha-1 OS=Homo sapiens GN=ATP1A1 PE=1 SV=1	796.6	996.6	1720.5	1550.4	896.6	1635.4	0.548245
Q5JWF2	Guanine nucleotide-binding protein G(s) subunit alpha isoforms XLas OS=Homo sapiens GN=GNAS PE=1 SV=2	241.4	307.9	556.8	477.9	274.7	517.3	0.531026
P54709	Sodium/potassium-transporting ATPase subunit beta-3 OS=Homo sapiens GN=ATP1B3 PE=1 SV=1	137.3	165.2	306	272.2	151.2	289.1	0.523002
P60903	Protein S100-A10 OS=Homo sapiens GN=S100A10 PE=1 SV=2	198	215.3	454.8	386.3	206.7	420.6	0.491441
P53985	Monocarboxylate transporter 1 OS=Homo sapiens GN=SLC16A1 PE=1 SV=3	76.4	80.7	206.4	170.3	78.5	188.3	0.416888
