# Supplementary figures and images for: Ribosome collisions trigger cis-acting feedback inhibition of translation initiation
Source: eLife journal article supplement (doi:10.7554/elife.60038), 2020-07-13

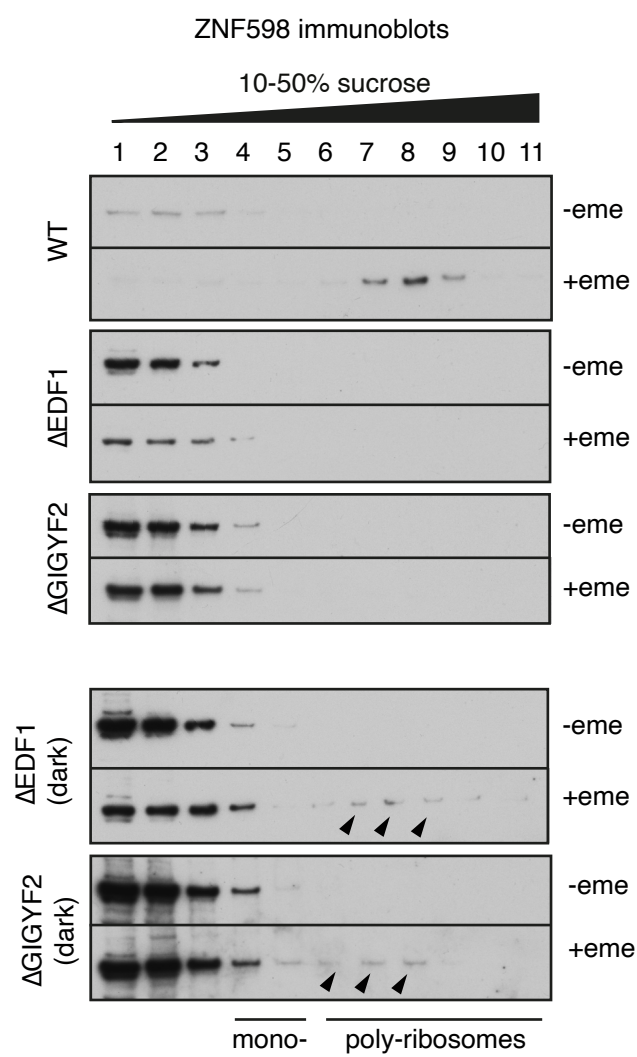

Supplement: supp [file elife-60038-supp-v1.zip]

A

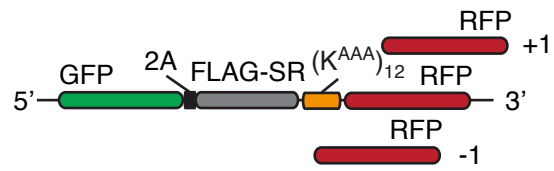

C

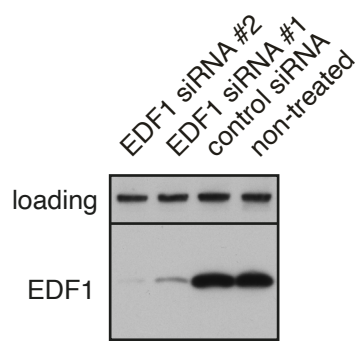

B

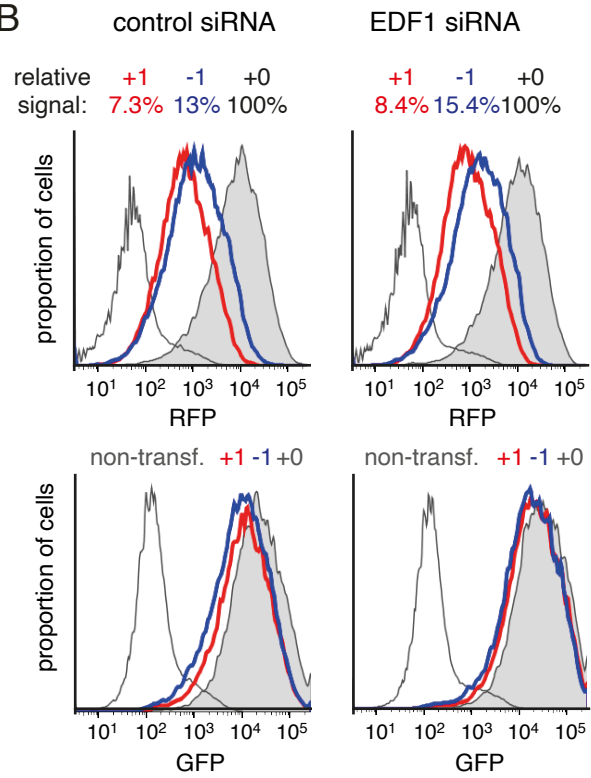

Supplement: supp [file elife-60038-supp-v1.zip]

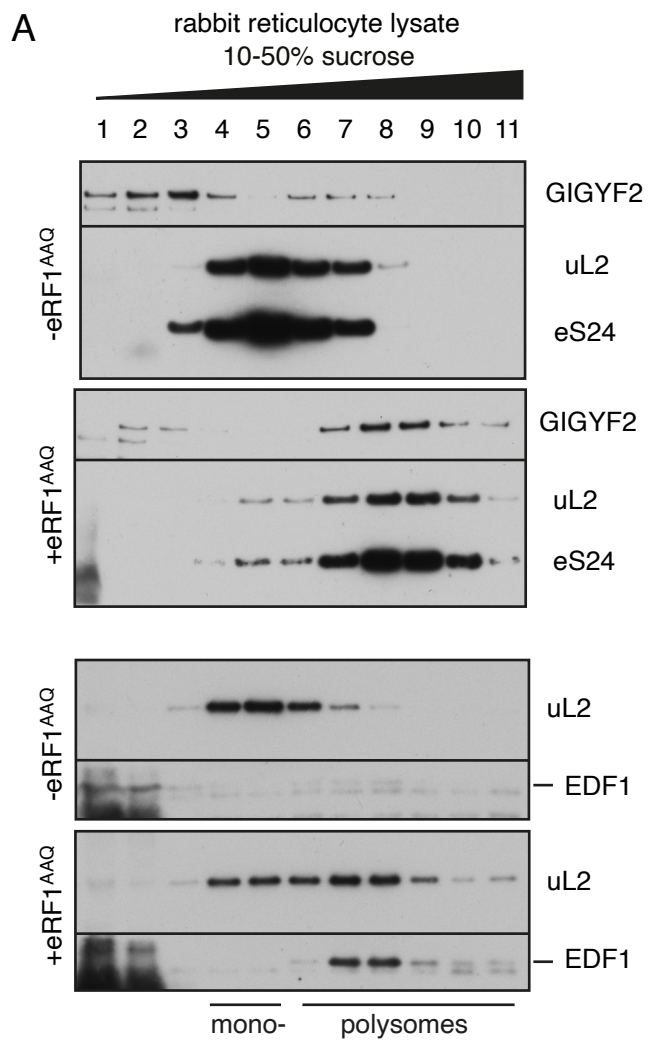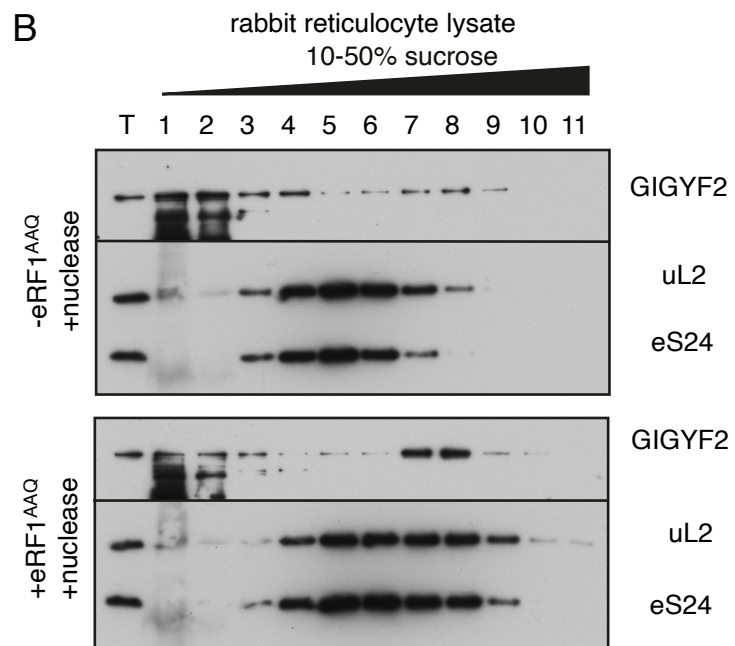

Supplement: supp [file elife-60038-supp-v1.zip]

A

WT XBP1

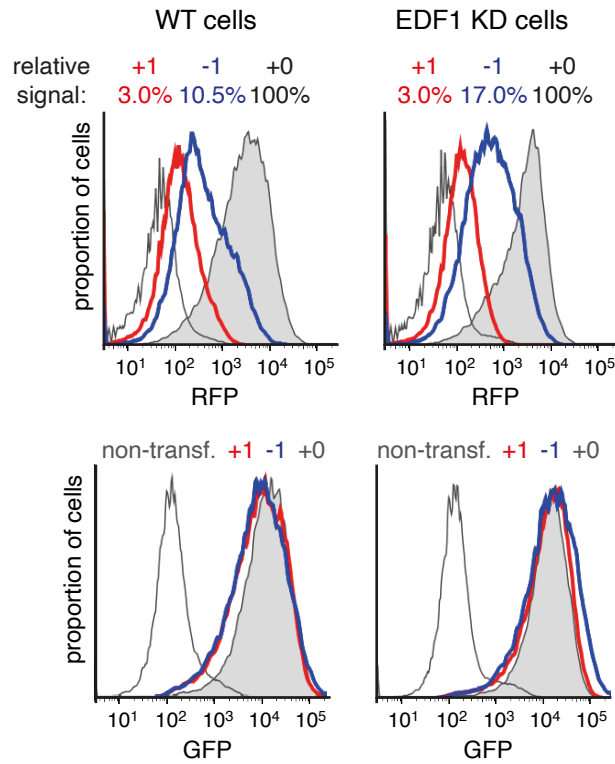

B

XBP1(S255A)

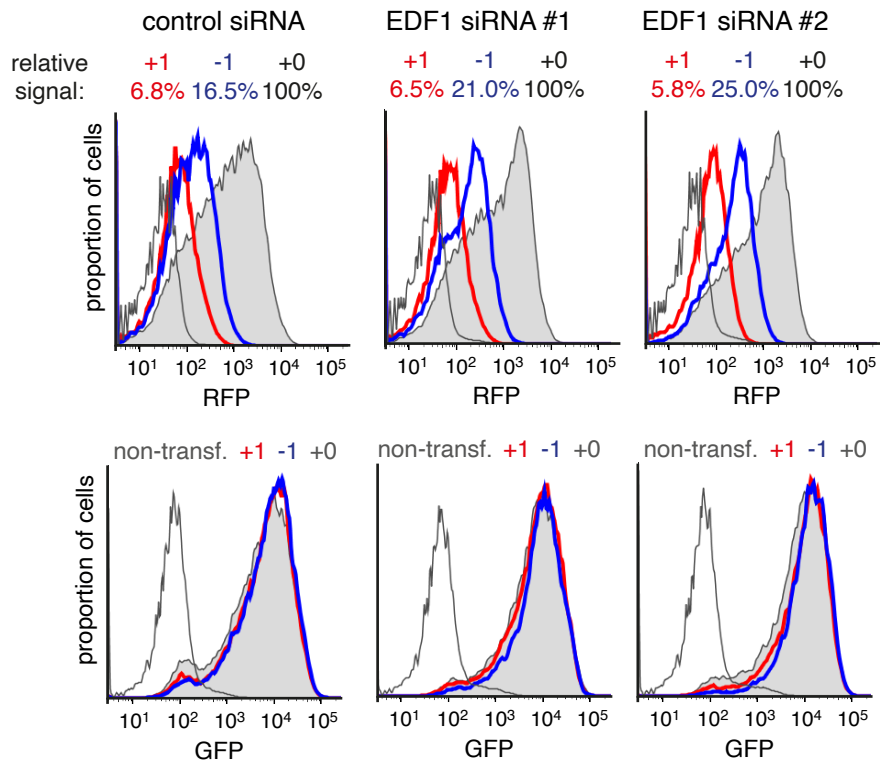

Supplement: supp [file elife-60038-supp-v1.zip]

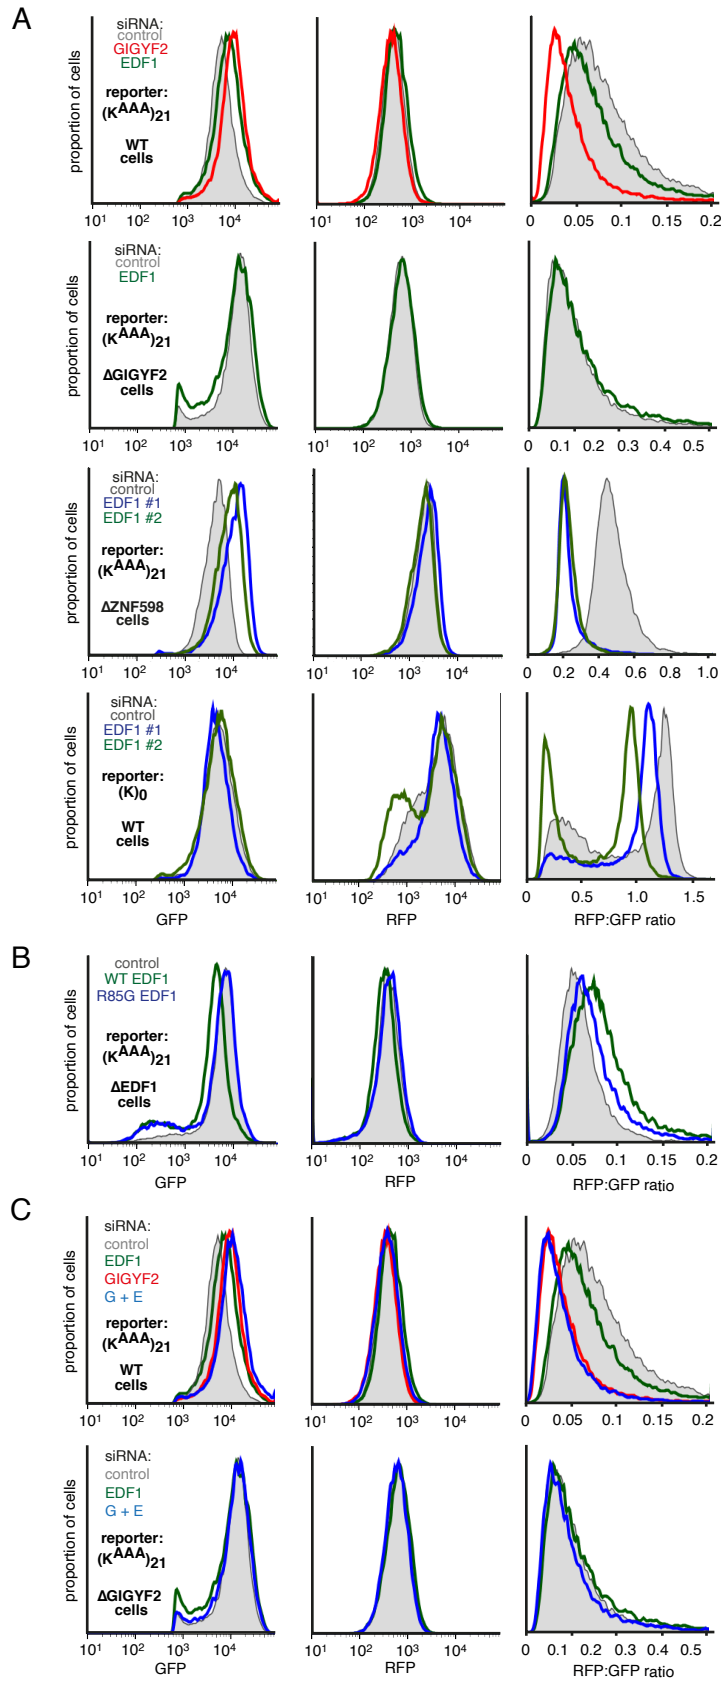

Supplement: supp [file elife-60038-supp-v1.zip]

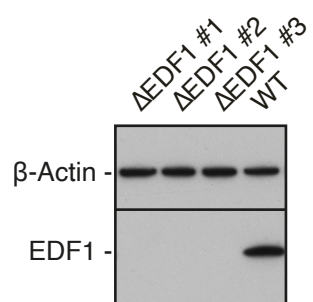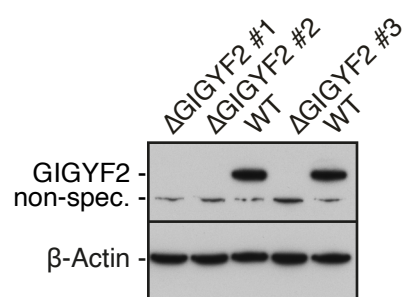

Supplement: supp [file elife-60038-supp-v1.zip]

A

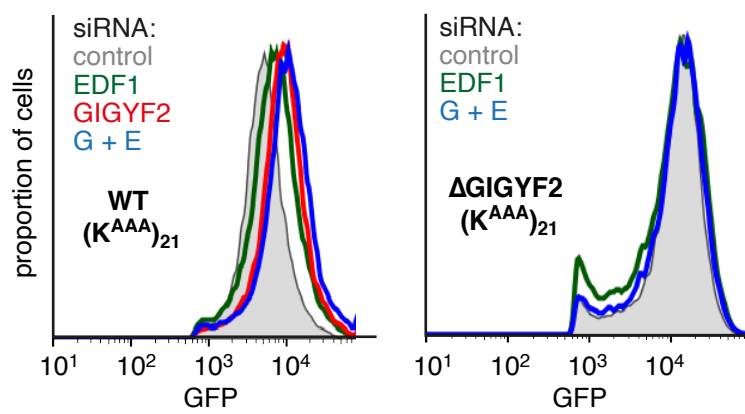

B

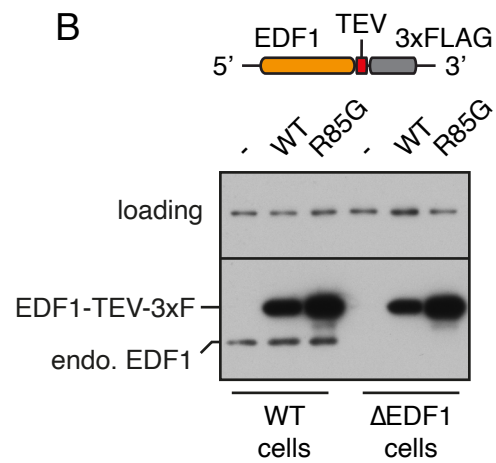

Supplement: supp [file elife-60038-supp-v1.zip]

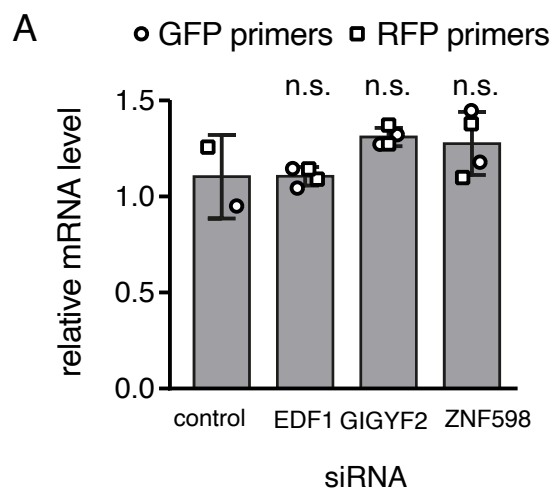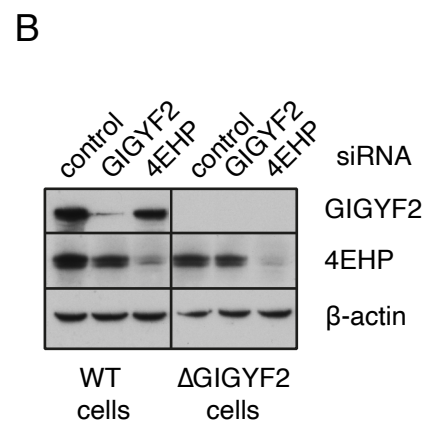

Supplement: supp [file elife-60038-supp-v1.zip]

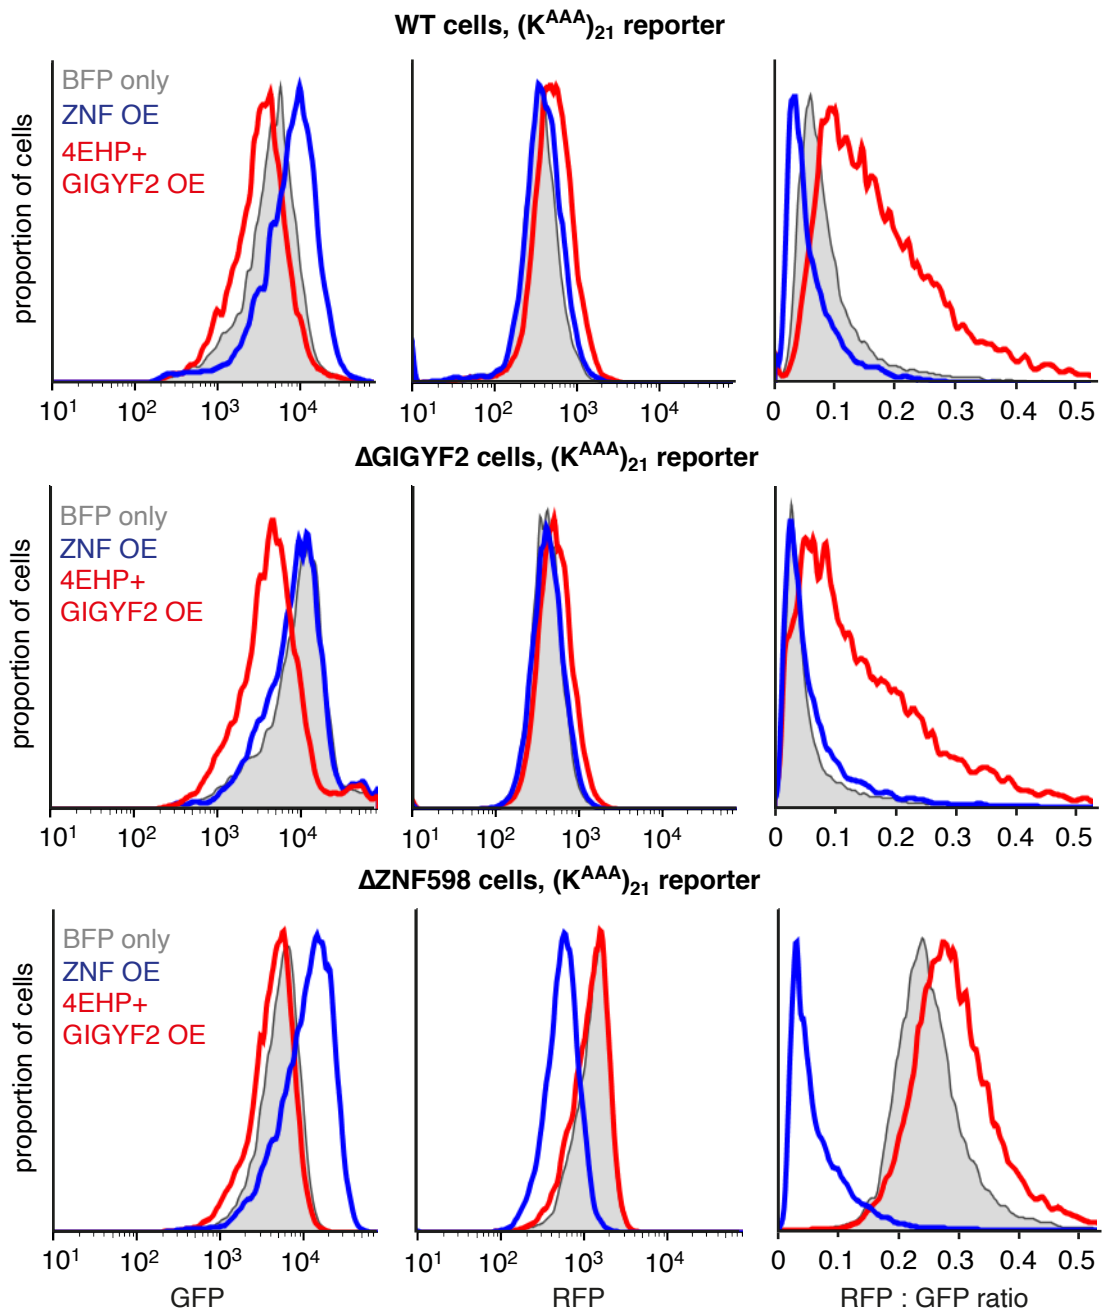

Supplement: supp [file elife-60038-supp-v1.zip]
